# Supplementary material for: Determining the structures, acidity and adsorption properties of Al substituted HZSM-5
Source: Royal Society of Chemistry journal article supplement (doi:10.1039/c9cp04050a), 2019-01-01
Supplement: c9cp04050a1.pdf [file c9cp04050a1.pdf]

## Supporting Information

Nan Zhang,<sup>a</sup> Chunli Liu,<sup>b,c,d</sup> Jinghong Ma,<sup>a</sup> Ruifeng Li,<sup>\*a</sup> Haijun Jiao<sup>\*b,e</sup>

(a) College of Chemistry and Chemical Engineering, Taiyuan University of Technology, Taiyuan, 030024, China. b) State Key Laboratory of Coal Conversion, Institute of Coal Chemistry, Chinese Academy of Sciences, Taiyuan, 030001, China; c) National Energy Center for Coal to Liquids, Synfuels China Co., Ltd, Huairou District, Beijing, 101400, China; d) University of Chinese Academy of Sciences, No. 19A Yuquan Road, Beijing, 100049, China; e) Leibniz-Institut für Katalyse e.V. an der Universität Rostock, Albert-Einstein Strasse 29a, 18059 Rostock, Germany E-mail: [rfli@tyut.edu.cn](mailto:rfli@tyut.edu.cn); [haijun.jiao@catalysis.de](mailto:haijun.jiao@catalysis.de)

## Contents

|                                                                                                                                                                                                                                                   |    |
|---------------------------------------------------------------------------------------------------------------------------------------------------------------------------------------------------------------------------------------------------|----|
| Table S1: Computed electronic energies (eV) of all 48 acidic sites for one Al substitution .....                                                                                                                                                  | 2  |
| Table S2: Bader charge (BC) for H atom in the bare HZSM5 structures .....                                                                                                                                                                         | 3  |
| Table S3: Computed electronic energies (eV) of pyridine adsorption at all 48 acidic sites for one Al substitution.....                                                                                                                            | 4  |
| Table S4: Computed electronic energies (eV) of ammonia adsorption at all 48 acidic sites for one Al substitution.....                                                                                                                             | 5  |
| Table S5: Computed electronic energies (eV) of the adsorption of NH <sub>2</sub> CH <sub>3</sub> , NH(CH <sub>3</sub> ) <sub>2</sub> and N(CH <sub>3</sub> ) <sub>3</sub> at the T1, T3, T5, T7, T11 and T12 centers for one Al substitution..... | 6  |
| Table S6: All simulated desorption temperature of pyridine and NH <sub>3</sub> .....                                                                                                                                                              | 7  |
| Table S7: Computed electronic energies (eV) of the adsorption of benzene, toluene and p-xylene at the T1, T3, T5, T7, T11 and T12 centers for one Al substitution.....                                                                            | 8  |
| Figure S1: The optimized configurations of all 48 acidic sites for one Al substitution in the framework .....                                                                                                                                     | 9  |
| Figure S2: Calculated Bader charge as a function of relative energy of all 48 acid sites and pyridine adsorption enthalpy .....                                                                                                                   | 21 |
| Figure S3: The optimized configurations of pyridine adsorption at all 48 acidic sites of one Al substitution in the framework.....                                                                                                                | 22 |
| Figure S4: The optimized configurations of ammonia adsorption at all 48 acidic sites of one Al substitution in the framework.....                                                                                                                 | 34 |
| Figure S5: The optimized configurations of the adsorption of NH <sub>2</sub> CH <sub>3</sub> at the acidic sites of the Al substituted T1, T3, T5, T7, T11 and T12 sites in the framework.....                                                    | 46 |
| Figure S6: The optimized configurations of the adsorption of NH(CH <sub>3</sub> ) <sub>2</sub> at the acidic sites of the Al substituted T1, T3, T5, T7, T11 and T12 sites in the framework.....                                                  | 52 |
| Figure S7: The optimized configurations of the adsorption of N(CH <sub>3</sub> ) <sub>3</sub> at the acidic sites of the Al substituted T1, T3, T5, T7, T11 and T12 sites in the framework.....                                                   | 58 |
| Figure S8: The optimized configurations of benzene adsorption at the acidic sites of the Al substituted T1, T3, T5, T7, T11 and T12 sites in the framework .....                                                                                  | 64 |
| Figure S9: The optimized configurations of toluene adsorption at the acidic sites of the Al substituted T1, T3, T5, T7, T11 and T12 sites in the framework .....                                                                                  | 70 |
| Figure S10: The optimized configurations of p-xylene adsorption at the acidic sites of the Al substituted T1, T3, T5, T7, T11 and T12 sites in the framework .....                                                                                | 76 |

Table S1: Computed electronic energies (eV) of all 48 acidic sites for one Al substitution

|            |                            |                               |                               |                               |
|------------|----------------------------|-------------------------------|-------------------------------|-------------------------------|
| <b>T1</b>  | $T_1^{Al-O^H-T_2^{Si}}$    | $T_1^{Al-O^H-T_{10}^{Si}}$    | $T_1^{Al-O^H-T_5^{Si}}$       | $T_1^{Al-O^H-T_4^{Si}}$       |
| <i>E</i>   | -2296.63                   | -2296.54                      | -2296.53                      | -2296.34                      |
| <b>T2</b>  | $T_2^{Al-O^H-T_6^{Si}}$    | $T_2^{Al-O^H-T_1^{Si}}$       | $T_2^{Al-O^H-T_8^{Si}}$       | $T_2^{Al-O^H-T_3^{Si}}$       |
| <i>E</i>   | -2296.68                   | -2296.61                      | -2296.54                      | -2296.49                      |
| <b>T3</b>  | $T_3^{Al-O^H-T_4^{Si}}$    | $T_3^{Al-O^H-T_6^{Si}}$       | $T_3^{Al-O^H-T_{12}^{Si}}$    | $T_3^{Al-O^H-T_2^{Si}}$       |
| <i>E</i>   | -2296.67                   | -2296.65                      | -2296.63                      | -2296.61                      |
| <b>T4</b>  | $T_4^{Al-O^H-T_7^{Si}}$    | $T_4^{Al-O^H-T_5^{Si}}$       | $T_4^{Al-O^H-T_1^{Si}}$       | $T_4^{Al-O^H-T_3^{Si}}$       |
| <i>E</i>   | -2296.68                   | -2296.64                      | -2296.57                      | -2296.51                      |
| <b>T5</b>  | $T_5^{Al-O^H-T_{11}^{Si}}$ | $T_5^{Al-O^H-T_6^{Si}}$       | $T_5^{Al-O^H-T_1^{Si}}$       | $T_5^{Al-O^H-T_4^{Si}}$       |
| <i>E</i>   | -2296.58                   | -2296.57                      | -2296.57                      | -2296.45                      |
| <b>T6</b>  | $T_6^{Al-O^H-T_2^{Si}}$    | $T_6^{Al-O^H-T_3^{Si}}$       | $T_6^{Al-O^H-T_5^{Si}}$       | $T_6^{Al-O^H-T_9^{Si}}$       |
| <i>E</i>   | -2296.63                   | -2296.60                      | -2296.58                      | -2296.51                      |
| <b>T7</b>  | $T_7^{Al-O^H-T_{11}^{Si}}$ | $T_7^{Al-O^H-T_8^{Si}}$       | $T_7^{Al-O^H-T_4^{Si}}$       | $T_7^{Al-O^H-T_7^{Si}}$       |
| <i>E</i>   | -2296.64                   | -2296.62                      | -2296.62                      | -2296.58                      |
| <b>T8</b>  | $T_8^{Al-O^H-T_{12}^{Si}}$ | $T_8^{Al-O^H-T_7^{Si}}$       | $T_8^{Al-O^H-T_9^{Si}}$       | $T_8^{Al-O^H-T_2^{Si}}$       |
| <i>E</i>   | -2296.73                   | -2296.59                      | -2296.50                      | -2296.46                      |
| <b>T9</b>  | $T_9^{Al-O^H-T_{10}^{Si}}$ | $T_9^{Al-O^H-T_9^{Si}}$       | $T_9^{Al-O^H-T_6^{Si}}$       | $T_9^{Al-O^H-T_8^{Si}}$       |
| <i>E</i>   | -2296.69                   | -2296.54                      | -2296.53                      | -2296.47                      |
| <b>T10</b> | $T_{10}^{Al-O^H-T_1^{Si}}$ | $T_{10}^{Al-O^H-T_{10}^{Si}}$ | $T_{10}^{Al-O^H-T_{11}^{Si}}$ | $T_{10}^{Al-O^H-T_9^{Si}}$    |
| <i>E</i>   | -2296.62                   | -2296.53                      | -2296.39                      | -2296.35                      |
| <b>T11</b> | $T_{11}^{Al-O^H-T_5^{Si}}$ | $T_{11}^{Al-O^H-T_7^{Si}}$    | $T_{11}^{Al-O^H-T_{12}^{Si}}$ | $T_{11}^{Al-O^H-T_{10}^{Si}}$ |
| <i>E</i>   | -2296.62                   | -2296.59                      | -2296.58                      | -2296.46                      |
| <b>T12</b> | $T_{12}^{Al-O^H-T_8^{Si}}$ | $T_{12}^{Al-O^H-T_{12}^{Si}}$ | $T_{12}^{Al-O^H-T_3^{Si}}$    | $T_{12}^{Al-O^H-T_{11}^{Si}}$ |
| <i>E</i>   | -2296.70                   | -2296.63                      | -2296.62                      | -2296.58                      |

Table S2: Bader charge (BC) for H atom in the bare HZSM5 structures

|                       |                            |                               |                               |                               |
|-----------------------|----------------------------|-------------------------------|-------------------------------|-------------------------------|
| <b>T1</b>             | $T_1^{Al}-O^H-T_2^{Si}$    | $T_1^{Al}-O^H-T_{10}^{Si}$    | $T_1^{Al}-O^H-T_5^{Si}$       | $T_1^{Al}-O^H-T_4^{Si}$       |
| <i>BC/bare HZSM-5</i> | 0.67                       | 0.68                          | 0.67                          | 0.65                          |
| <b>T2</b>             | $T_2^{Al}-O^H-T_6^{Si}$    | $T_2^{Al}-O^H-T_1^{Si}$       | $T_2^{Al}-O^H-T_8^{Si}$       | $T_2^{Al}-O^H-T_3^{Si}$       |
| <i>BC/bare HZSM-5</i> | 0.64                       | 0.70                          | 0.68                          | 0.72                          |
| <b>T3</b>             | $T_3^{Al}-O^H-T_4^{Si}$    | $T_3^{Al}-O^H-T_6^{Si}$       | $T_3^{Al}-O^H-T_{12}^{Si}$    | $T_3^{Al}-O^H-T_2^{Si}$       |
| <i>BC/bare HZSM-5</i> | 0.72                       | 0.71                          | 0.71                          | 0.69                          |
| <b>T4</b>             | $T_4^{Al}-O^H-T_7^{Si}$    | $T_4^{Al}-O^H-T_5^{Si}$       | $T_4^{Al}-O^H-T_1^{Si}$       | $T_4^{Al}-O^H-T_3^{Si}$       |
| <i>BC/bare HZSM-5</i> | 0.68                       | 0.67                          | 0.67                          | 0.68                          |
| <b>T5</b>             | $T_5^{Al}-O^H-T_{11}^{Si}$ | $T_5^{Al}-O^H-T_6^{Si}$       | $T_5^{Al}-O^H-T_1^{Si}$       | $T_5^{Al}-O^H-T_4^{Si}$       |
| <i>BC/bare HZSM-5</i> | 0.66                       | 0.70                          | 0.68                          | 0.66                          |
| <b>T6</b>             | $T_6^{Al}-O^H-T_2^{Si}$    | $T_6^{Al}-O^H-T_3^{Si}$       | $T_6^{Al}-O^H-T_5^{Si}$       | $T_6^{Al}-O^H-T_9^{Si}$       |
| <i>BC/bare HZSM-5</i> | 0.68                       | 0.68                          | 0.71                          | 0.67                          |
| <b>T7</b>             | $T_7^{Al}-O^H-T_{11}^{Si}$ | $T_7^{Al}-O^H-T_8^{Si}$       | $T_7^{Al}-O^H-T_4^{Si}$       | $T_7^{Al}-O^H-T_7^{Si}$       |
| <i>BC/bare HZSM-5</i> | 0.67                       | 0.67                          | 0.67                          | 0.67                          |
| <b>T8</b>             | $T_8^{Al}-O^H-T_{12}^{Si}$ | $T_8^{Al}-O^H-T_7^{Si}$       | $T_8^{Al}-O^H-T_9^{Si}$       | $T_8^{Al}-O^H-T_2^{Si}$       |
| <i>BC/bare HZSM-5</i> | 0.69                       | 0.70                          | 0.68                          | 0.67                          |
| <b>T9</b>             | $T_9^{Al}-O^H-T_{10}^{Si}$ | $T_9^{Al}-O^H-T_9^{Si}$       | $T_9^{Al}-O^H-T_6^{Si}$       | $T_9^{Al}-O^H-T_8^{Si}$       |
| <i>BC/bare HZSM-5</i> | 0.70                       | 0.69                          | 0.67                          | 0.69                          |
| <b>T10</b>            | $T_{10}^{Al}-O^H-T_1^{Si}$ | $T_{10}^{Al}-O^H-T_{10}^{Si}$ | $T_{10}^{Al}-O^H-T_{11}^{Si}$ | $T_{10}^{Al}-O^H-T_9^{Si}$    |
| <i>BC/bare HZSM-5</i> | 0.70                       | 0.70                          | 0.66                          | 0.68                          |
| <b>T11</b>            | $T_{11}^{Al}-O^H-T_5^{Si}$ | $T_{11}^{Al}-O^H-T_7^{Si}$    | $T_{11}^{Al}-O^H-T_{12}^{Si}$ | $T_{11}^{Al}-O^H-T_{10}^{Si}$ |
| <i>BC/bare HZSM-5</i> | 0.66                       | 0.64                          | 0.67                          | 0.65                          |
| <b>T12</b>            | $T_{12}^{Al}-O^H-T_8^{Si}$ | $T_{12}^{Al}-O^H-T_{12}^{Si}$ | $T_{12}^{Al}-O^H-T_3^{Si}$    | $T_{12}^{Al}-O^H-T_{11}^{Si}$ |
| <i>BC/bare HZSM-5</i> | 0.68                       | 0.71                          | 0.68                          | 0.68                          |

Table S3: Computed electronic energies (eV) of pyridine adsorption at all 48 acidic sites for one Al substitution

|                   |                            |                               |                               |                               |
|-------------------|----------------------------|-------------------------------|-------------------------------|-------------------------------|
| <b>T1</b>         | $T_1^{Al}-O^H-T_2^{Si}$    | $T_1^{Al}-O^H-T_{10}^{Si}$    | $T_1^{Al}-O^H-T_5^{Si}$       | $T_1^{Al}-O^H-T_4^{Si}$       |
| <i>E/Pyridine</i> | -2370.13                   | -2370.00                      | -2370.04                      | -2368.43                      |
| <b>T2</b>         | $T_2^{Al}-O^H-T_6^{Si}$    | $T_2^{Al}-O^H-T_1^{Si}$       | $T_2^{Al}-O^H-T_8^{Si}$       | $T_2^{Al}-O^H-T_3^{Si}$       |
| <i>E/Pyridine</i> | -2369.82                   | -2370.03                      | -2369.42                      | -2369.96                      |
| <b>T3</b>         | $T_3^{Al}-O^H-T_4^{Si}$    | $T_3^{Al}-O^H-T_6^{Si}$       | $T_3^{Al}-O^H-T_{12}^{Si}$    | $T_3^{Al}-O^H-T_2^{Si}$       |
| <i>E/Pyridine</i> | -2369.88                   | -2370.02                      | -2370.07                      | -2370.05                      |
| <b>T4</b>         | $T_4^{Al}-O^H-T_7^{Si}$    | $T_4^{Al}-O^H-T_5^{Si}$       | $T_4^{Al}-O^H-T_1^{Si}$       | $T_4^{Al}-O^H-T_3^{Si}$       |
| <i>E/Pyridine</i> | -2369.68                   | -2369.87                      | -2368.47                      | -2369.90                      |
| <b>T5</b>         | $T_5^{Al}-O^H-T_{11}^{Si}$ | $T_5^{Al}-O^H-T_6^{Si}$       | $T_5^{Al}-O^H-T_1^{Si}$       | $T_5^{Al}-O^H-T_4^{Si}$       |
| <i>E/Pyridine</i> | -2368.37                   | -2370.03                      | -2369.68                      | -2369.67                      |
| <b>T6</b>         | $T_6^{Al}-O^H-T_2^{Si}$    | $T_6^{Al}-O^H-T_3^{Si}$       | $T_6^{Al}-O^H-T_5^{Si}$       | $T_6^{Al}-O^H-T_9^{Si}$       |
| <i>E/Pyridine</i> | -2369.56                   | -2369.17                      | -2369.86                      | -2369.84                      |
| <b>T7</b>         | $T_7^{Al}-O^H-T_{11}^{Si}$ | $T_7^{Al}-O^H-T_8^{Si}$       | $T_7^{Al}-O^H-T_4^{Si}$       | $T_7^{Al}-O^H-T_7^{Si}$       |
| <i>E/Pyridine</i> | -2370.13                   | -2370.07                      | -2370.11                      | -2370.09                      |
| <b>T8</b>         | $T_8^{Al}-O^H-T_{12}^{Si}$ | $T_8^{Al}-O^H-T_7^{Si}$       | $T_8^{Al}-O^H-T_9^{Si}$       | $T_8^{Al}-O^H-T_2^{Si}$       |
| <i>E/Pyridine</i> | -2368.49                   | -2370.00                      | -2369.97                      | -2369.48                      |
| <b>T9</b>         | $T_9^{Al}-O^H-T_{10}^{Si}$ | $T_9^{Al}-O^H-T_9^{Si}$       | $T_9^{Al}-O^H-T_6^{Si}$       | $T_9^{Al}-O^H-T_8^{Si}$       |
| <i>E/Pyridine</i> | -2369.62                   | -2369.80                      | -2369.83                      | -2369.98                      |
| <b>T10</b>        | $T_{10}^{Al}-O^H-T_1^{Si}$ | $T_{10}^{Al}-O^H-T_{10}^{Si}$ | $T_{10}^{Al}-O^H-T_{11}^{Si}$ | $T_{10}^{Al}-O^H-T_9^{Si}$    |
| <i>E/Pyridine</i> | -2370.06                   | -2370.02                      | -2368.65                      | -2369.81                      |
| <b>T11</b>        | $T_{11}^{Al}-O^H-T_5^{Si}$ | $T_{11}^{Al}-O^H-T_7^{Si}$    | $T_{11}^{Al}-O^H-T_{12}^{Si}$ | $T_{11}^{Al}-O^H-T_{10}^{Si}$ |
| <i>E/Pyridine</i> | -2369.35                   | -2370.02                      | -2370.09                      | -2369.85                      |
| <b>T12</b>        | $T_{12}^{Al}-O^H-T_8^{Si}$ | $T_{12}^{Al}-O^H-T_{12}^{Si}$ | $T_{12}^{Al}-O^H-T_3^{Si}$    | $T_{12}^{Al}-O^H-T_{11}^{Si}$ |
| <i>E/Pyridine</i> | -2369.69                   | -2369.95                      | -2370.06                      | -2369.99                      |

Table S4: Computed electronic energies (eV) of ammonia adsorption at all 48 acidic sites for one Al substitution

|                         |                                                          |                                                             |                                                             |                                                             |
|-------------------------|----------------------------------------------------------|-------------------------------------------------------------|-------------------------------------------------------------|-------------------------------------------------------------|
| <b>T1</b>               | $T_1^{\text{Al-O}^{\text{H}}-\text{T}_2^{\text{Si}}}$    | $T_1^{\text{Al-O}^{\text{H}}-\text{T}_{10}^{\text{Si}}}$    | $T_1^{\text{Al-O}^{\text{H}}-\text{T}_5^{\text{Si}}}$       | $T_1^{\text{Al-O}^{\text{H}}-\text{T}_4^{\text{Si}}}$       |
| <i>E/NH<sub>3</sub></i> | -2317.63                                                 | -2317.60                                                    | -2317.63                                                    | -2317.31                                                    |
| <b>T2</b>               | $T_2^{\text{Al-O}^{\text{H}}-\text{T}_6^{\text{Si}}}$    | $T_2^{\text{Al-O}^{\text{H}}-\text{T}_1^{\text{Si}}}$       | $T_2^{\text{Al-O}^{\text{H}}-\text{T}_8^{\text{Si}}}$       | $T_2^{\text{Al-O}^{\text{H}}-\text{T}_3^{\text{Si}}}$       |
| <i>E/NH<sub>3</sub></i> | -2317.66                                                 | -2317.63                                                    | -2317.45                                                    | -2317.63                                                    |
| <b>T3</b>               | $T_3^{\text{Al-O}^{\text{H}}-\text{T}_4^{\text{Si}}}$    | $T_3^{\text{Al-O}^{\text{H}}-\text{T}_6^{\text{Si}}}$       | $T_3^{\text{Al-O}^{\text{H}}-\text{T}_{12}^{\text{Si}}}$    | $T_3^{\text{Al-O}^{\text{H}}-\text{T}_2^{\text{Si}}}$       |
| <i>E/NH<sub>3</sub></i> | -2317.66                                                 | -2317.64                                                    | -2317.65                                                    | -2317.64                                                    |
| <b>T4</b>               | $T_4^{\text{Al-O}^{\text{H}}-\text{T}_7^{\text{Si}}}$    | $T_4^{\text{Al-O}^{\text{H}}-\text{T}_5^{\text{Si}}}$       | $T_4^{\text{Al-O}^{\text{H}}-\text{T}_1^{\text{Si}}}$       | $T_4^{\text{Al-O}^{\text{H}}-\text{T}_3^{\text{Si}}}$       |
| <i>E/NH<sub>3</sub></i> | -2317.75                                                 | -2317.82                                                    | -2316.60                                                    | -2317.74                                                    |
| <b>T5</b>               | $T_5^{\text{Al-O}^{\text{H}}-\text{T}_{11}^{\text{Si}}}$ | $T_5^{\text{Al-O}^{\text{H}}-\text{T}_6^{\text{Si}}}$       | $T_5^{\text{Al-O}^{\text{H}}-\text{T}_1^{\text{Si}}}$       | $T_5^{\text{Al-O}^{\text{H}}-\text{T}_4^{\text{Si}}}$       |
| <i>E/NH<sub>3</sub></i> | -2317.61                                                 | -2317.67                                                    | -2317.67                                                    | -2317.61                                                    |
| <b>T6</b>               | $T_6^{\text{Al-O}^{\text{H}}-\text{T}_2^{\text{Si}}}$    | $T_6^{\text{Al-O}^{\text{H}}-\text{T}_3^{\text{Si}}}$       | $T_6^{\text{Al-O}^{\text{H}}-\text{T}_5^{\text{Si}}}$       | $T_6^{\text{Al-O}^{\text{H}}-\text{T}_9^{\text{Si}}}$       |
| <i>E/NH<sub>3</sub></i> | -2317.59                                                 | -2317.55                                                    | -2317.64                                                    | -2317.56                                                    |
| <b>T7</b>               | $T_7^{\text{Al-O}^{\text{H}}-\text{T}_{11}^{\text{Si}}}$ | $T_7^{\text{Al-O}^{\text{H}}-\text{T}_8^{\text{Si}}}$       | $T_7^{\text{Al-O}^{\text{H}}-\text{T}_4^{\text{Si}}}$       | $T_7^{\text{Al-O}^{\text{H}}-\text{T}_7^{\text{Si}}}$       |
| <i>E/NH<sub>3</sub></i> | -2317.72                                                 | -2317.72                                                    | -2317.72                                                    | -2317.72                                                    |
| <b>T8</b>               | $T_8^{\text{Al-O}^{\text{H}}-\text{T}_{12}^{\text{Si}}}$ | $T_8^{\text{Al-O}^{\text{H}}-\text{T}_7^{\text{Si}}}$       | $T_8^{\text{Al-O}^{\text{H}}-\text{T}_9^{\text{Si}}}$       | $T_8^{\text{Al-O}^{\text{H}}-\text{T}_2^{\text{Si}}}$       |
| <i>E/NH<sub>3</sub></i> | -2316.81                                                 | -2317.63                                                    | -2317.58                                                    | -2317.50                                                    |
| <b>T9</b>               | $T_9^{\text{Al-O}^{\text{H}}-\text{T}_{10}^{\text{Si}}}$ | $T_9^{\text{Al-O}^{\text{H}}-\text{T}_9^{\text{Si}}}$       | $T_9^{\text{Al-O}^{\text{H}}-\text{T}_6^{\text{Si}}}$       | $T_9^{\text{Al-O}^{\text{H}}-\text{T}_8^{\text{Si}}}$       |
| <i>E/NH<sub>3</sub></i> | -2316.20                                                 | -2317.64                                                    | -2317.59                                                    | -2317.64                                                    |
| <b>T10</b>              | $T_{10}^{\text{Al-O}^{\text{H}}-\text{T}_1^{\text{Si}}}$ | $T_{10}^{\text{Al-O}^{\text{H}}-\text{T}_{10}^{\text{Si}}}$ | $T_{10}^{\text{Al-O}^{\text{H}}-\text{T}_{11}^{\text{Si}}}$ | $T_{10}^{\text{Al-O}^{\text{H}}-\text{T}_9^{\text{Si}}}$    |
| <i>E/NH<sub>3</sub></i> | -2317.65                                                 | -2317.68                                                    | -2317.68                                                    | -2317.47                                                    |
| <b>T11</b>              | $T_{11}^{\text{Al-O}^{\text{H}}-\text{T}_5^{\text{Si}}}$ | $T_{11}^{\text{Al-O}^{\text{H}}-\text{T}_7^{\text{Si}}}$    | $T_{11}^{\text{Al-O}^{\text{H}}-\text{T}_{12}^{\text{Si}}}$ | $T_{11}^{\text{Al-O}^{\text{H}}-\text{T}_{10}^{\text{Si}}}$ |
| <i>E/NH<sub>3</sub></i> | -2317.65                                                 | -2317.64                                                    | -2317.71                                                    | -2317.54                                                    |
| <b>T12</b>              | $T_{12}^{\text{Al-O}^{\text{H}}-\text{T}_8^{\text{Si}}}$ | $T_{12}^{\text{Al-O}^{\text{H}}-\text{T}_{12}^{\text{Si}}}$ | $T_{12}^{\text{Al-O}^{\text{H}}-\text{T}_3^{\text{Si}}}$    | $T_{12}^{\text{Al-O}^{\text{H}}-\text{T}_{11}^{\text{Si}}}$ |
| <i>E/NH<sub>3</sub></i> | -2316.57                                                 | -2317.64                                                    | -2317.62                                                    | -2317.62                                                    |

Table S5: Computed electronic energies (eV) of the adsorption of  $\text{NH}_2\text{CH}_3$ ,  $\text{NH}(\text{CH}_3)_2$  and  $\text{N}(\text{CH}_3)_3$  at the T1, T3, T5, T7, T11 and T12 centers for one Al substitution

|                              |                                                                        |                                                                           |                                                                           |                                                                           |
|------------------------------|------------------------------------------------------------------------|---------------------------------------------------------------------------|---------------------------------------------------------------------------|---------------------------------------------------------------------------|
| <b>T1</b>                    | $\text{T}_1^{\text{Al}}\text{-O}^{\text{H}}\text{-T}_2^{\text{Si}}$    | $\text{T}_1^{\text{Al}}\text{-O}^{\text{H}}\text{-T}_{10}^{\text{Si}}$    | $\text{T}_1^{\text{Al}}\text{-O}^{\text{H}}\text{-T}_5^{\text{Si}}$       | $\text{T}_1^{\text{Al}}\text{-O}^{\text{H}}\text{-T}_4^{\text{Si}}$       |
| $E/\text{NH}_2\text{CH}_3$   | -2334.23                                                               | -2334.16                                                                  | -2334.23                                                                  | -2332.68                                                                  |
| $E/\text{NH}(\text{CH}_3)_2$ | -2350.82                                                               | -2350.79                                                                  | -2350.82                                                                  | -2348.95                                                                  |
| $E/\text{N}(\text{CH}_3)_3$  | -2367.28                                                               | -2367.21                                                                  | -2367.10                                                                  | -2365.55                                                                  |
| <b>T3</b>                    | $\text{T}_3^{\text{Al}}\text{-O}^{\text{H}}\text{-T}_4^{\text{Si}}$    | $\text{T}_3^{\text{Al}}\text{-O}^{\text{H}}\text{-T}_6^{\text{Si}}$       | $\text{T}_3^{\text{Al}}\text{-O}^{\text{H}}\text{-T}_{12}^{\text{Si}}$    | $\text{T}_3^{\text{Al}}\text{-O}^{\text{H}}\text{-T}_2^{\text{Si}}$       |
| $E/\text{NH}_2\text{CH}_3$   | -2334.24                                                               | -2334.16                                                                  | -2334.16                                                                  | -2334.16                                                                  |
| $E/\text{NH}(\text{CH}_3)_2$ | -2350.79                                                               | -2350.79                                                                  | -2350.76                                                                  | -2350.82                                                                  |
| $E/\text{N}(\text{CH}_3)_3$  | -2367.21                                                               | -2367.21                                                                  | -2366.91                                                                  | -2367.18                                                                  |
| <b>T5</b>                    | $\text{T}_5^{\text{Al}}\text{-O}^{\text{H}}\text{-T}_{11}^{\text{Si}}$ | $\text{T}_5^{\text{Al}}\text{-O}^{\text{H}}\text{-T}_6^{\text{Si}}$       | $\text{T}_5^{\text{Al}}\text{-O}^{\text{H}}\text{-T}_1^{\text{Si}}$       | $\text{T}_5^{\text{Al}}\text{-O}^{\text{H}}\text{-T}_4^{\text{Si}}$       |
| $E/\text{NH}_2\text{CH}_3$   | -2334.15                                                               | -2334.21                                                                  | -2334.16                                                                  | -2334.18                                                                  |
| $E/\text{NH}(\text{CH}_3)_2$ | -2350.76                                                               | -2350.82                                                                  | -2350.78                                                                  | -2350.80                                                                  |
| $E/\text{N}(\text{CH}_3)_3$  | -2366.86                                                               | -2367.08                                                                  | -2367.25                                                                  | -2367.22                                                                  |
| <b>T7</b>                    | $\text{T}_7^{\text{Al}}\text{-O}^{\text{H}}\text{-T}_{11}^{\text{Si}}$ | $\text{T}_7^{\text{Al}}\text{-O}^{\text{H}}\text{-T}_8^{\text{Si}}$       | $\text{T}_7^{\text{Al}}\text{-O}^{\text{H}}\text{-T}_4^{\text{Si}}$       | $\text{T}_7^{\text{Al}}\text{-O}^{\text{H}}\text{-T}_7^{\text{Si}}$       |
| $E/\text{NH}_2\text{CH}_3$   | -2334.17                                                               | -2334.25                                                                  | -2334.36                                                                  | -2334.27                                                                  |
| $E/\text{NH}(\text{CH}_3)_2$ | -2350.84                                                               | -2350.78                                                                  | -2350.94                                                                  | -2350.89                                                                  |
| $E/\text{N}(\text{CH}_3)_3$  | -2367.22                                                               | -2367.22                                                                  | -2367.29                                                                  | -2367.11                                                                  |
| <b>T11</b>                   | $\text{T}_{11}^{\text{Al}}\text{-O}^{\text{H}}\text{-T}_5^{\text{Si}}$ | $\text{T}_{11}^{\text{Al}}\text{-O}^{\text{H}}\text{-T}_7^{\text{Si}}$    | $\text{T}_{11}^{\text{Al}}\text{-O}^{\text{H}}\text{-T}_{12}^{\text{Si}}$ | $\text{T}_{11}^{\text{Al}}\text{-O}^{\text{H}}\text{-T}_{10}^{\text{Si}}$ |
| $E/\text{NH}_2\text{CH}_3$   | -2334.04                                                               | -2334.06                                                                  | -2334.23                                                                  | -2334.05                                                                  |
| $E/\text{NH}(\text{CH}_3)_2$ | -2350.78                                                               | -2350.83                                                                  | -2350.85                                                                  | -2350.20                                                                  |
| $E/\text{N}(\text{CH}_3)_3$  | -2366.98                                                               | -2367.23                                                                  | -2367.20                                                                  | -2365.49                                                                  |
| <b>T12</b>                   | $\text{T}_{12}^{\text{Al}}\text{-O}^{\text{H}}\text{-T}_8^{\text{Si}}$ | $\text{T}_{12}^{\text{Al}}\text{-O}^{\text{H}}\text{-T}_{12}^{\text{Si}}$ | $\text{T}_{12}^{\text{Al}}\text{-O}^{\text{H}}\text{-T}_3^{\text{Si}}$    | $\text{T}_{12}^{\text{Al}}\text{-O}^{\text{H}}\text{-T}_{11}^{\text{Si}}$ |
| $E/\text{NH}_2\text{CH}_3$   | -2332.06                                                               | -2334.17                                                                  | -2334.04                                                                  | -2334.13                                                                  |
| $E/\text{NH}(\text{CH}_3)_2$ | -2348.75                                                               | -2350.73                                                                  | -2350.75                                                                  | -2350.71                                                                  |
| $E/\text{N}(\text{CH}_3)_3$  | -2365.63                                                               | -2367.27                                                                  | -2367.24                                                                  | -2367.18                                                                  |

Table S6: All simulated desorption temperature of pyridine and NH<sub>3</sub>

| <b>T1</b>                               |              | A=E11/K | A=E12/K | A=E13/K | A=E14/K |
|-----------------------------------------|--------------|---------|---------|---------|---------|
| $\Delta H_{\text{ads}}/\text{NH}_3$     | -128.2/-1.33 | 482     | 452     | 425     | 401     |
| $\Delta H_{\text{ads}}/\text{Pyridine}$ | -204.7/-2.12 | 760     | 712     | 670     | 631     |
| <hr/>                                   |              |         |         |         |         |
| <b>T2</b>                               |              |         |         |         |         |
| $\Delta H_{\text{ads}}/\text{NH}_3$     | -125.6/-1.30 | 473     | 442     | 416     | 392     |
| $\Delta H_{\text{ads}}/\text{Pyridine}$ | -191.0/-1.98 | 711     | 666     | 626     | 591     |
| <hr/>                                   |              |         |         |         |         |
| <b>T3</b>                               |              |         |         |         |         |
| $\Delta H_{\text{ads}}/\text{NH}_3$     | -128.3/-1.33 | 484     | 451     | 424     | 400     |
| $\Delta H_{\text{ads}}/\text{Pyridine}$ | -204.5/-2.12 | 758     | 712     | 670     | 631     |
| <hr/>                                   |              |         |         |         |         |
| <b>T4</b>                               |              |         |         |         |         |
| $\Delta H_{\text{ads}}/\text{NH}_3$     | -141.6/-1.47 | 531     | 498     | 468     | 441     |
| $\Delta H_{\text{ads}}/\text{Pyridine}$ | -175.7/-1.83 | 654     | 614     | 577     | 545     |
| <hr/>                                   |              |         |         |         |         |
| <b>T5</b>                               |              |         |         |         |         |
| $\Delta H_{\text{ads}}/\text{NH}_3$     | -139.0/-1.44 | 521     | 488     | 458     | 433     |
| $\Delta H_{\text{ads}}/\text{Pyridine}$ | -200.6/-2.08 | 744     | 699     | 656     | 620     |
| <hr/>                                   |              |         |         |         |         |
| <b>T6</b>                               |              |         |         |         |         |
| $\Delta H_{\text{ads}}/\text{NH}_3$     | -128.6/-1.33 | 483     | 453     | 426     | 402     |
| $\Delta H_{\text{ads}}/\text{Pyridine}$ | -180.0/-1.87 | 671     | 629     | 592     | 558     |
| <hr/>                                   |              |         |         |         |         |
| <b>T7</b>                               |              |         |         |         |         |
| $\Delta H_{\text{ads}}/\text{NH}_3$     | -140.7/-1.46 | 528     | 495     | 464     | 438     |
| $\Delta H_{\text{ads}}/\text{Pyridine}$ | -203.4/-2.12 | 756     | 707     | 665     | 629     |
| <hr/>                                   |              |         |         |         |         |
| <b>T8</b>                               |              |         |         |         |         |
| $\Delta H_{\text{ads}}/\text{NH}_3$     | -120.5/-1.25 | 454     | 426     | 400     | 376     |
| $\Delta H_{\text{ads}}/\text{Pyridine}$ | -182.1/-1.89 | 678     | 637     | 598     | 563     |
| <hr/>                                   |              |         |         |         |         |
| <b>T9</b>                               |              |         |         |         |         |
| $\Delta H_{\text{ads}}/\text{NH}_3$     | -122.5/-1.27 | 462     | 432     | 407     | 382     |
| $\Delta H_{\text{ads}}/\text{Pyridine}$ | -182.0/-1.89 | 678     | 634     | 597     | 564     |
| <hr/>                                   |              |         |         |         |         |
| <b>T10</b>                              |              |         |         |         |         |
| $\Delta H_{\text{ads}}/\text{NH}_3$     | -133.9/-1.39 | 502     | 472     | 442     | 418     |
| $\Delta H_{\text{ads}}/\text{Pyridine}$ | -178.0/-1.84 | 663     | 621     | 584     | 552     |
| <hr/>                                   |              |         |         |         |         |
| <b>T11</b>                              |              |         |         |         |         |
| $\Delta H_{\text{ads}}/\text{NH}_3$     | -136.1/-1.41 | 511     | 479     | 450     | 424     |
| $\Delta H_{\text{ads}}/\text{Pyridine}$ | -201.3/-2.09 | 747     | 700     | 659     | 623     |
| <hr/>                                   |              |         |         |         |         |
| <b>T12</b>                              |              |         |         |         |         |
| $\Delta H_{\text{ads}}/\text{NH}_3$     | -126.1/-1.31 | 475     | 444     | 417     | 394     |
| $\Delta H_{\text{ads}}/\text{Pyridine}$ | -189.2/-1.96 | 706     | 662     | 621     | 586     |

Table S7: Computed electronic energies (eV) of the adsorption of benzene, toluene and p-xylene at the T1, T3, T5, T7, T11 and T12 centers for one Al substitution

|                    |                            |                               |                               |                               |
|--------------------|----------------------------|-------------------------------|-------------------------------|-------------------------------|
| <b>T1</b>          | $T_1^{Al}-O^H-T_2^{Si}$    | $T_1^{Al}-O^H-T_{10}^{Si}$    | $T_1^{Al}-O^H-T_5^{Si}$       | $T_1^{Al}-O^H-T_4^{Si}$       |
| <i>E</i> /benzene  | -2373.73                   | -2373.45                      | -2373.57                      | -2372.94                      |
| <i>E</i> /toluene  | -2390.43                   | -2390.38                      | -2390.35                      | -2390.07                      |
| <i>E</i> /p-xylene | -2407.26                   | -2406.98                      | -2407.17                      | -2406.66                      |
| <b>T3</b>          | $T_3^{Al}-O^H-T_4^{Si}$    | $T_3^{Al}-O^H-T_6^{Si}$       | $T_3^{Al}-O^H-T_{12}^{Si}$    | $T_3^{Al}-O^H-T_2^{Si}$       |
| <i>E</i> /benzene  | -2373.43                   | -2373.43                      | -2373.70                      | -2373.55                      |
| <i>E</i> /toluene  | -2390.30                   | -2390.32                      | -2390.51                      | -2390.51                      |
| <i>E</i> /p-xylene | -2406.87                   | -2406.40                      | -2407.17                      | -2407.19                      |
| <b>T5</b>          | $T_5^{Al}-O^H-T_{11}^{Si}$ | $T_5^{Al}-O^H-T_6^{Si}$       | $T_5^{Al}-O^H-T_1^{Si}$       | $T_5^{Al}-O^H-T_4^{Si}$       |
| <i>E</i> /benzene  | -2373.27                   | -2373.54                      | -2373.55                      | -2373.38                      |
| <i>E</i> /toluene  | -2389.98                   | -2390.15                      | -2390.31                      | -2389.83                      |
| <i>E</i> /p-xylene | -2406.62                   | -2406.96                      | -2407.21                      | -2406.87                      |
| <b>T7</b>          | $T_7^{Al}-O^H-T_{11}^{Si}$ | $T_7^{Al}-O^H-T_8^{Si}$       | $T_7^{Al}-O^H-T_4^{Si}$       | $T_7^{Al}-O^H-T_7^{Si}$       |
| <i>E</i> /benzene  | -2373.43                   | -2373.71                      | -2373.62                      | -2373.17                      |
| <i>E</i> /toluene  | -2390.40                   | -2390.55                      | -2390.36                      | -2390.03                      |
| <i>E</i> /p-xylene | -2407.23                   | -2407.16                      | -2407.18                      | -2406.67                      |
| <b>T11</b>         | $T_{11}^{Al}-O^H-T_5^{Si}$ | $T_{11}^{Al}-O^H-T_7^{Si}$    | $T_{11}^{Al}-O^H-T_{12}^{Si}$ | $T_{11}^{Al}-O^H-T_{10}^{Si}$ |
| <i>E</i> /benzene  | -2373.22                   | -2373.47                      | -2373.62                      | -2373.19                      |
| <i>E</i> /toluene  | -2389.71                   | -2390.33                      | -2390.40                      | -2389.99                      |
| <i>E</i> /p-xylene | -2406.78                   | -2407.07                      | -2406.92                      | -2406.77                      |
| <b>T12</b>         | $T_{12}^{Al}-O^H-T_8^{Si}$ | $T_{12}^{Al}-O^H-T_{12}^{Si}$ | $T_{12}^{Al}-O^H-T_3^{Si}$    | $T_{12}^{Al}-O^H-T_{11}^{Si}$ |
| <i>E</i> /benzene  | -2372.56                   | -2373.63                      | -2373.68                      | -2373.52                      |
| <i>E</i> /toluene  | -2390.20                   | -2390.55                      | -2390.44                      | -2390.32                      |
| <i>E</i> /p-xylene | -2406.78                   | -2406.89                      | -2407.16                      | -2406.94                      |



Atoms  
 Al  
 Si  
 O  
 H  
 C  
 N

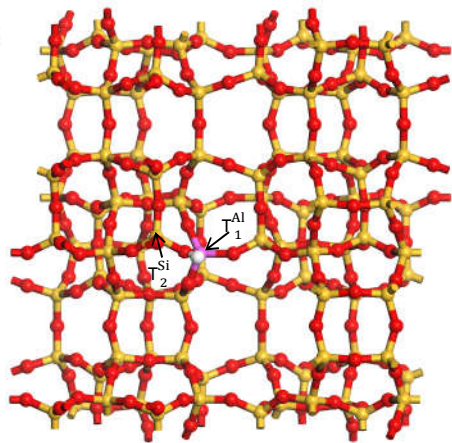

$T_1^{Al}-O^H-T_2^{Si}$

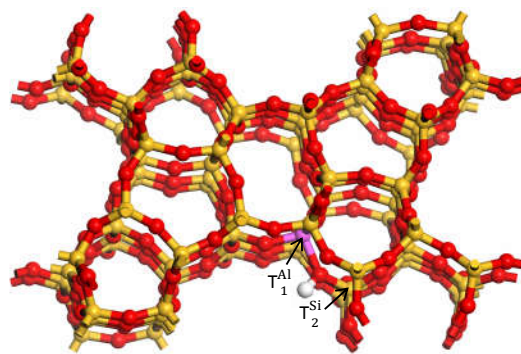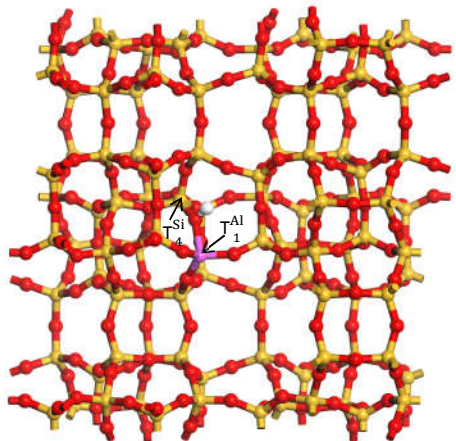

$T_1^{Al}-O^H-T_4^{Si}$

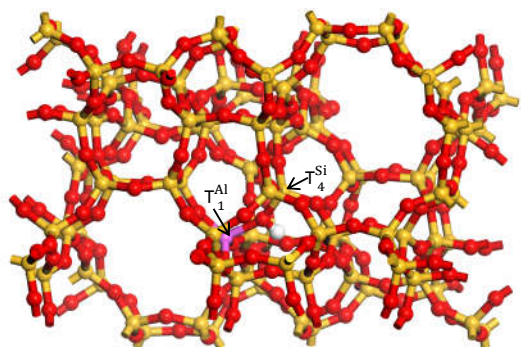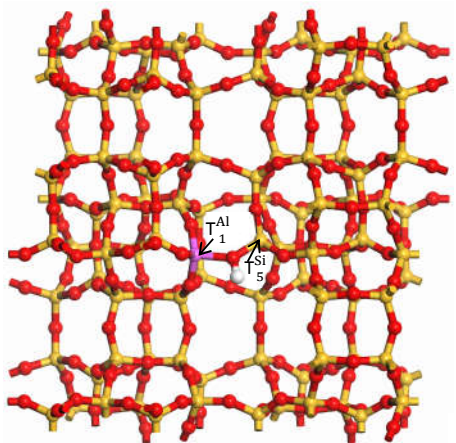

$T_1^{Al}-O^H-T_5^{Si}$

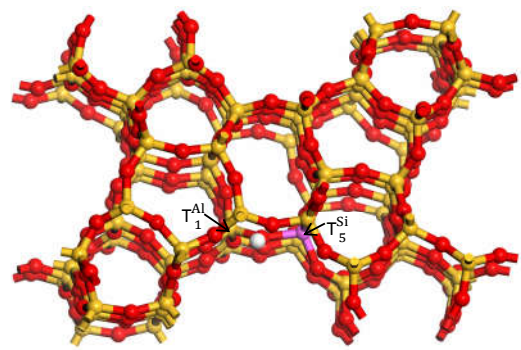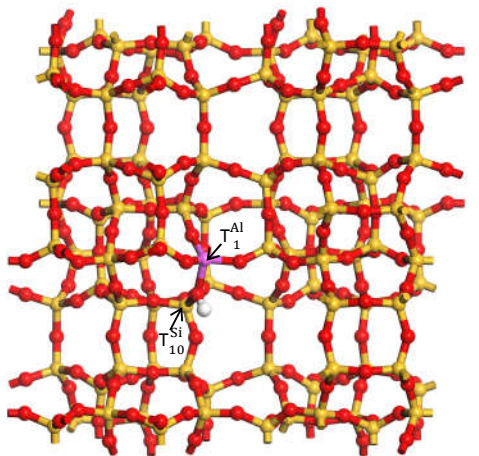

$T_1^{Al}-O^H-T_{10}^{Si}$

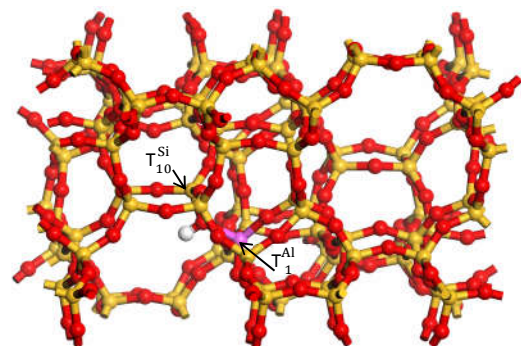

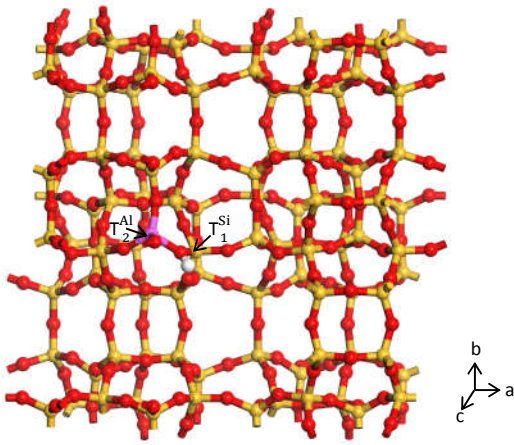
 $T_2^{Al}-O^H-T_1^{Si}$ 
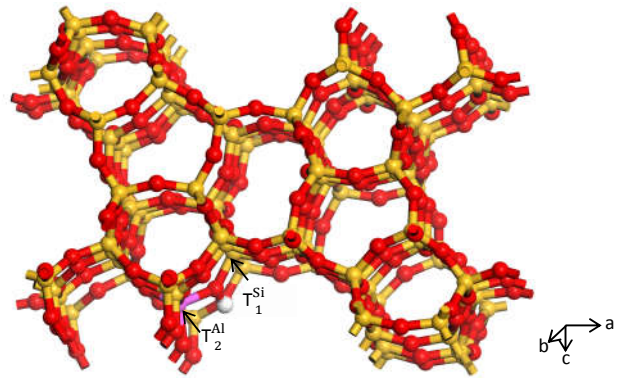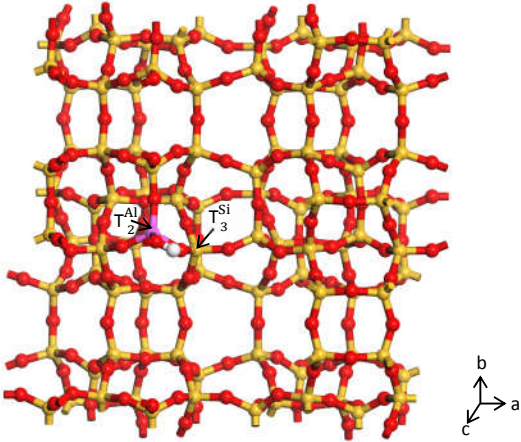
 $T_2^{Al}-O^H-T_3^{Si}$ 
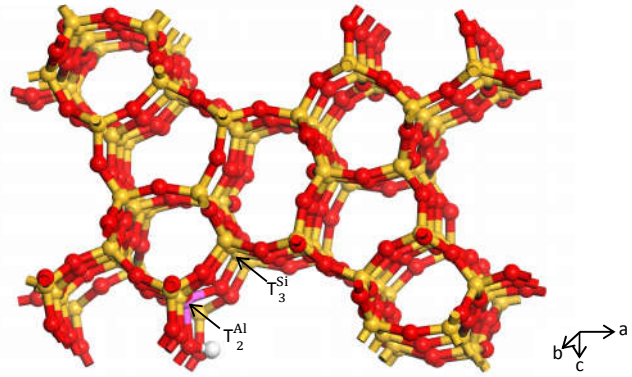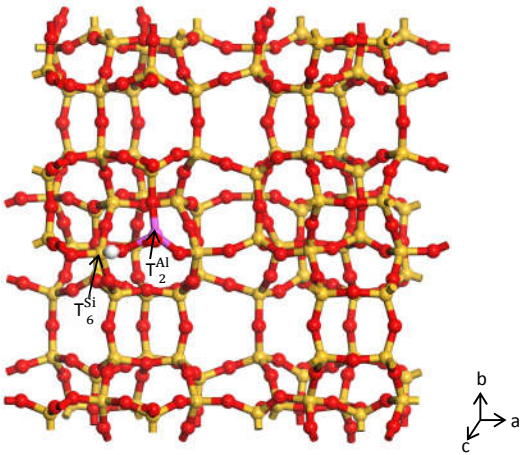
 $T_2^{Al}-O^H-T_6^{Si}$ 
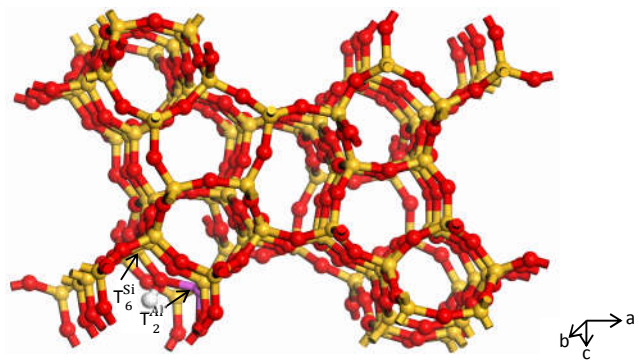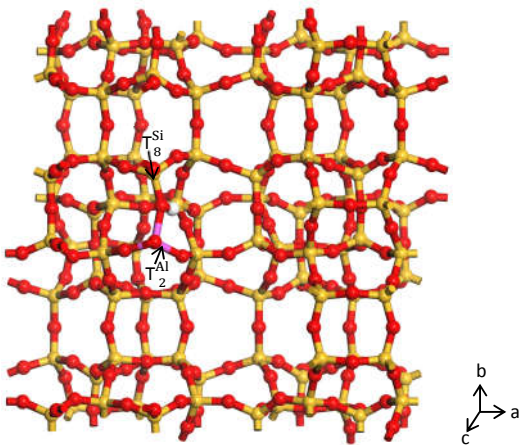
 $T_2^{Al}-O^H-T_8^{Si}$ 
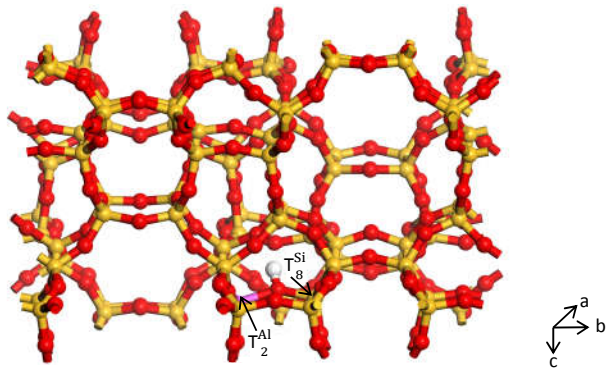

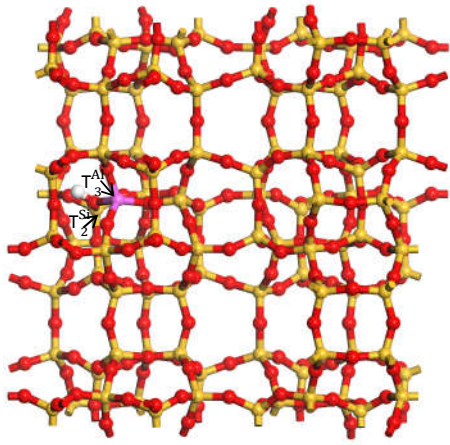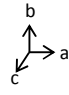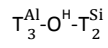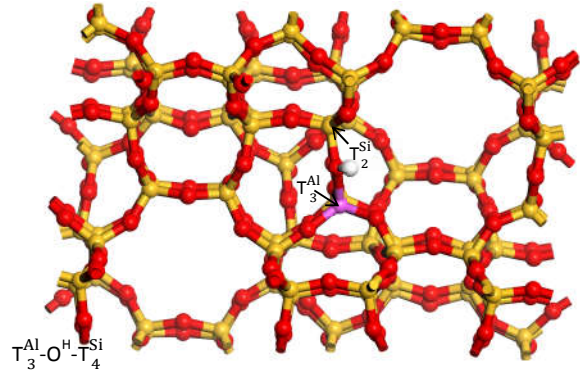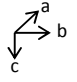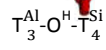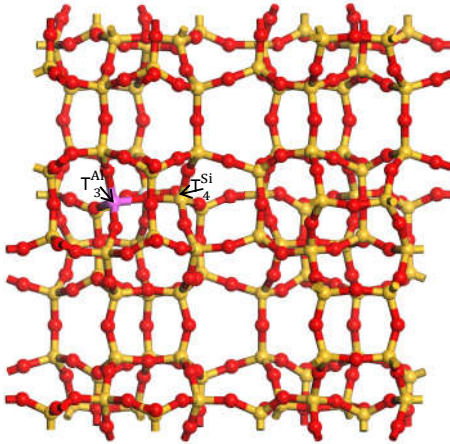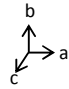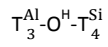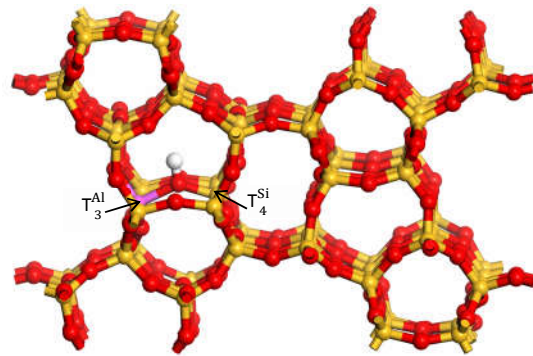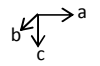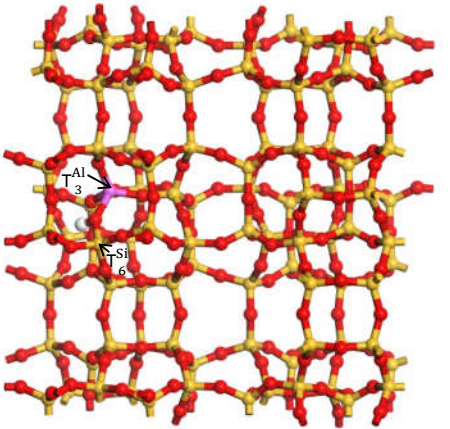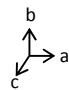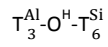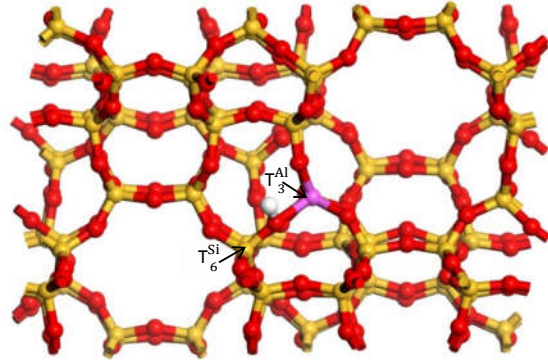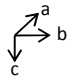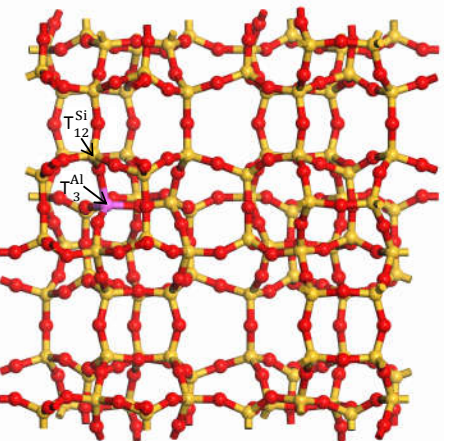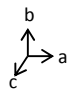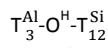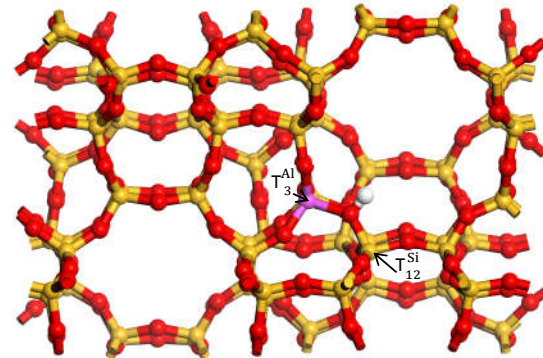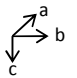

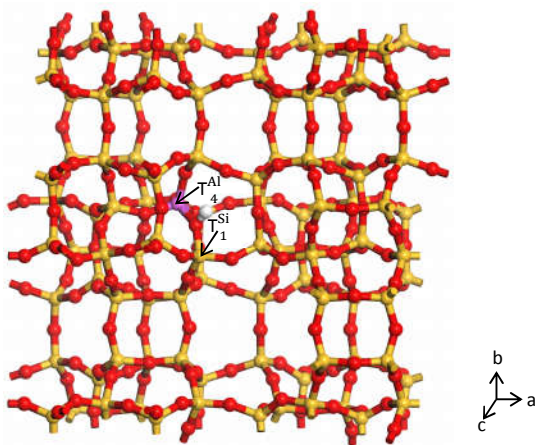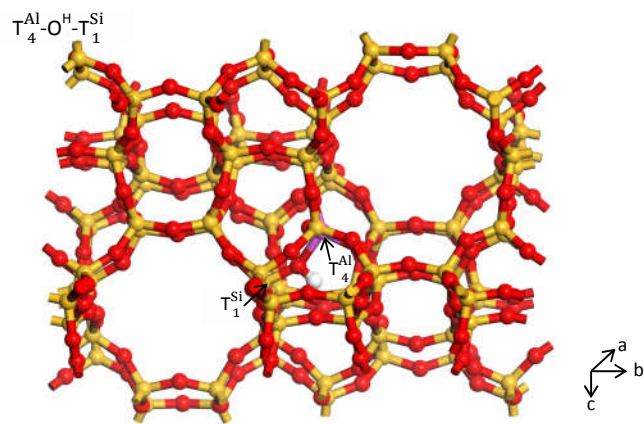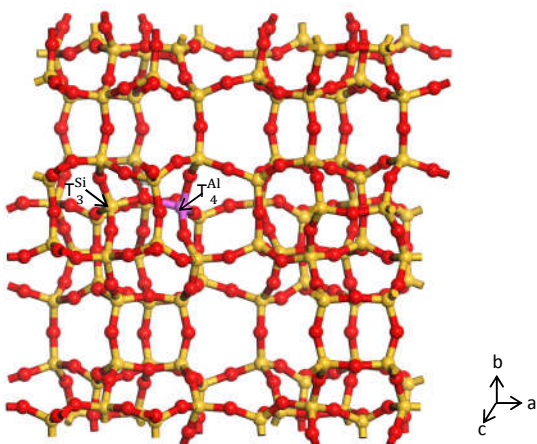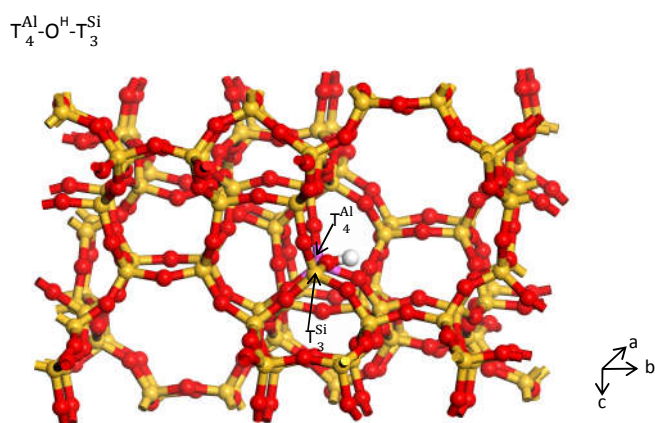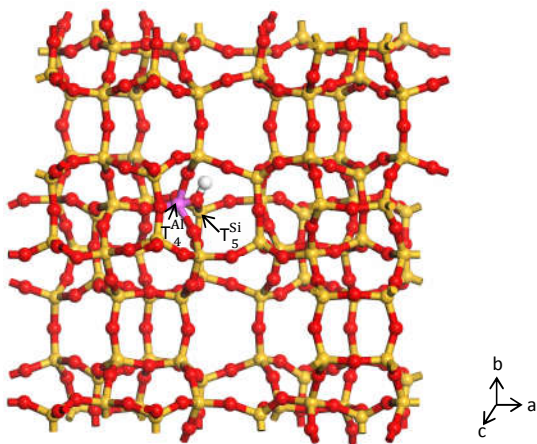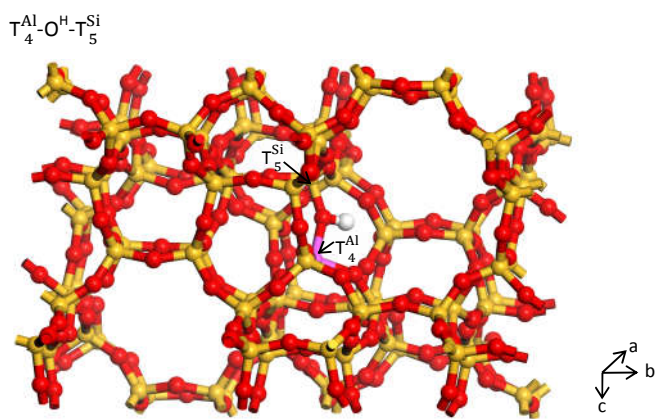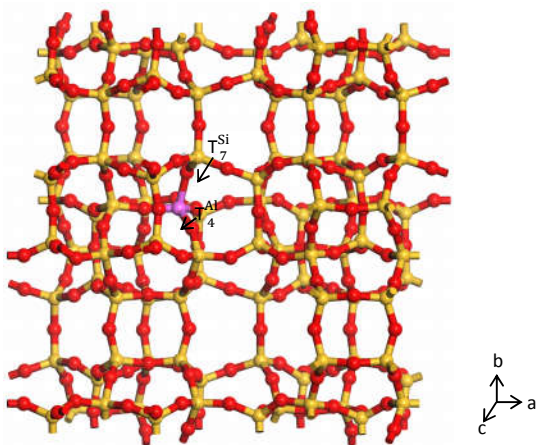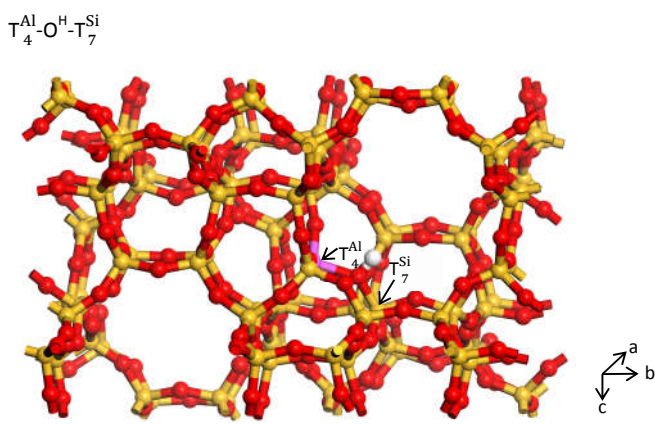

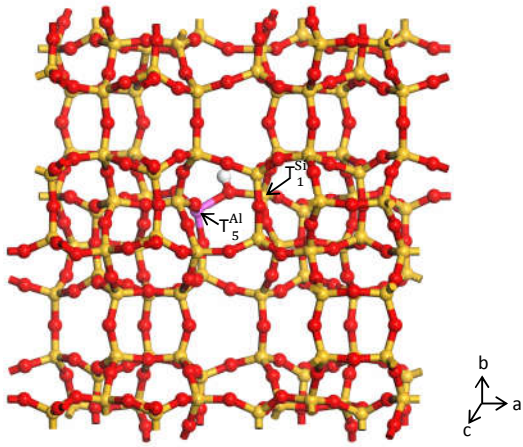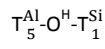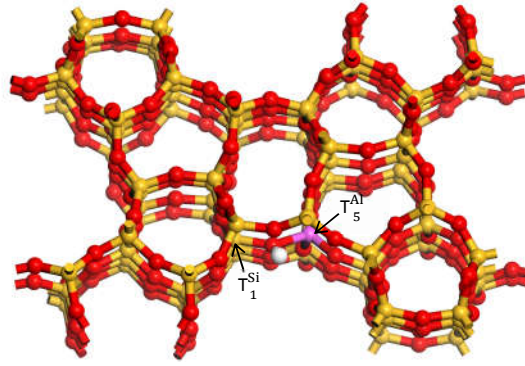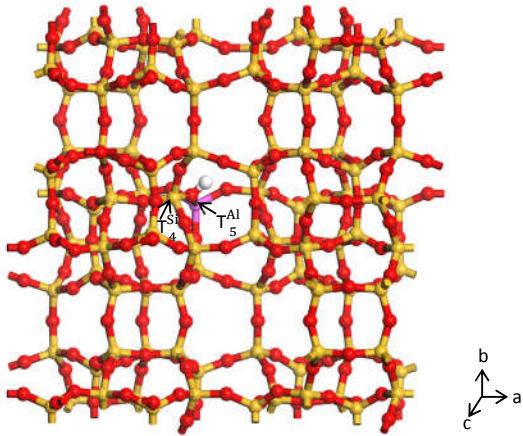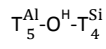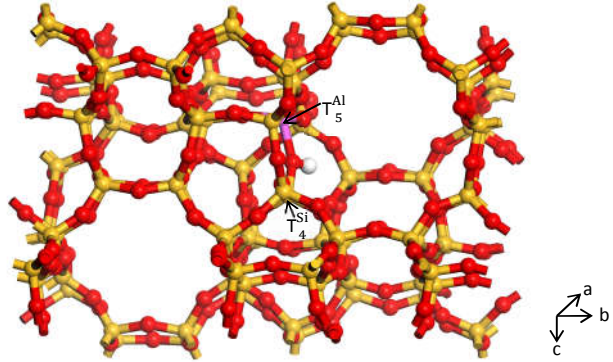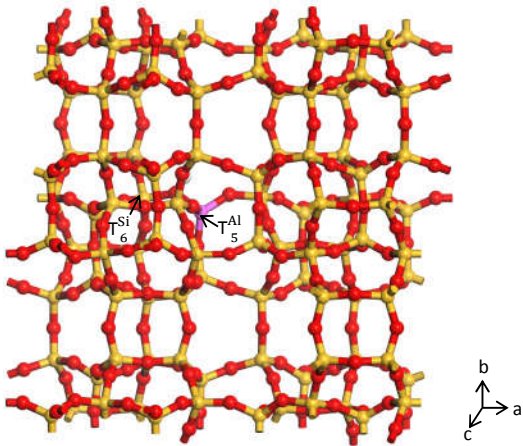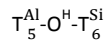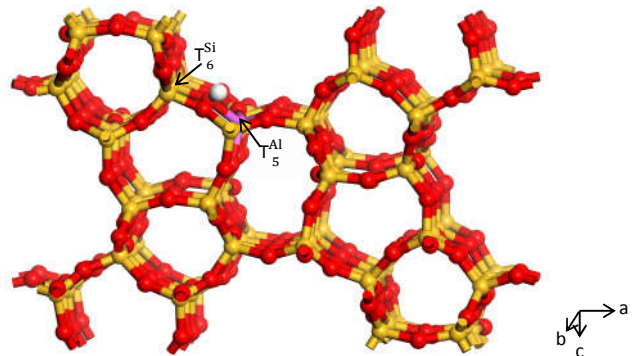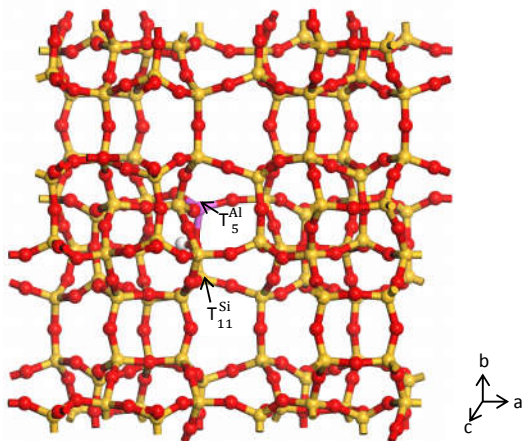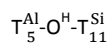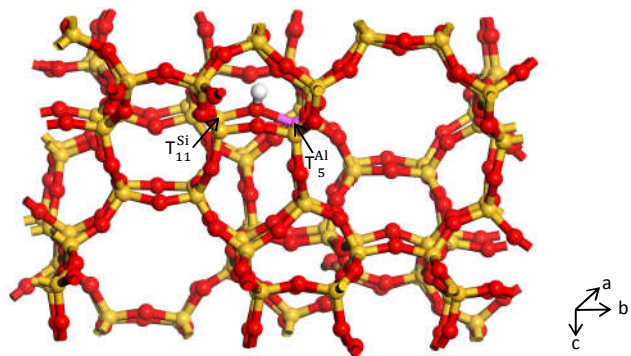

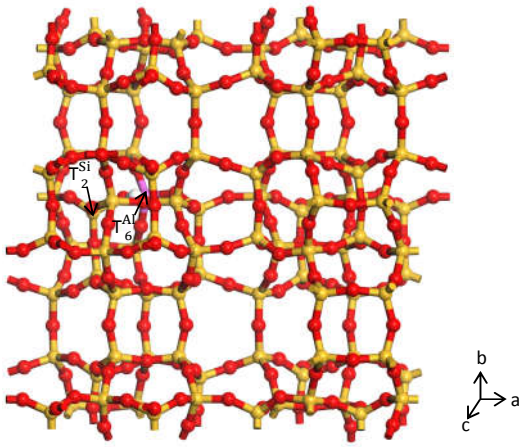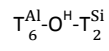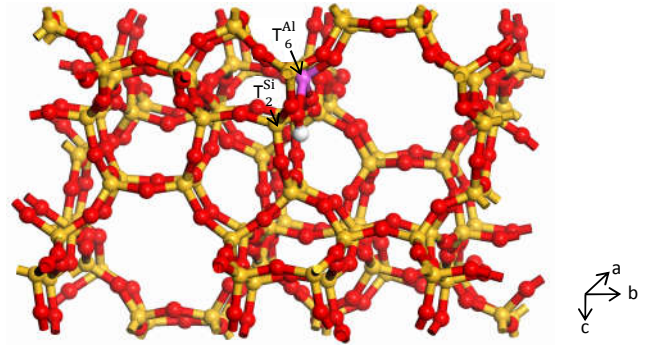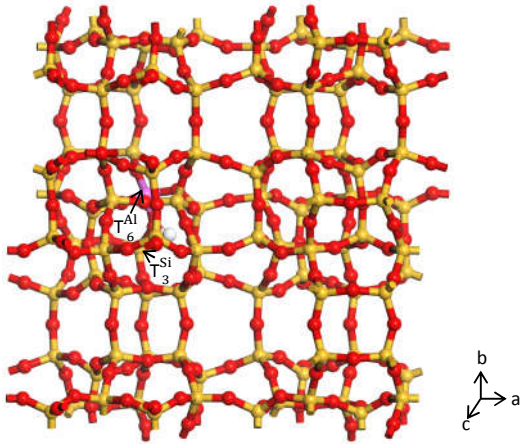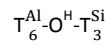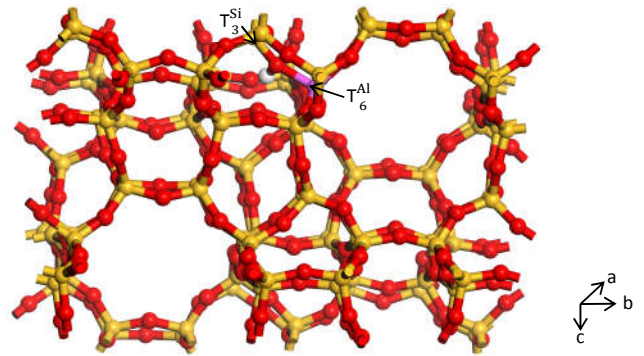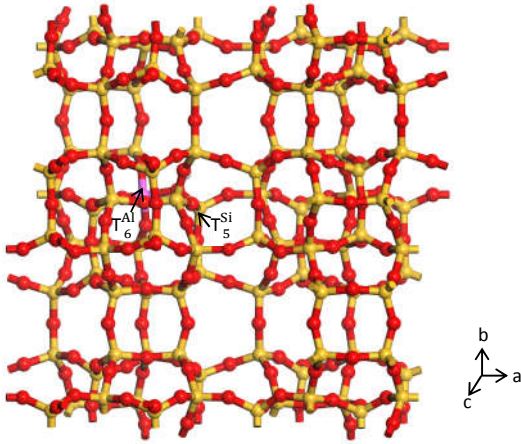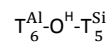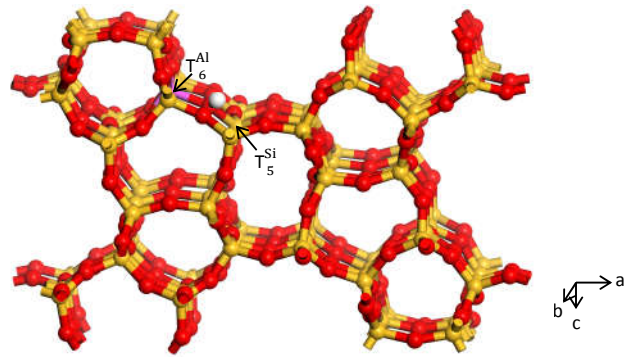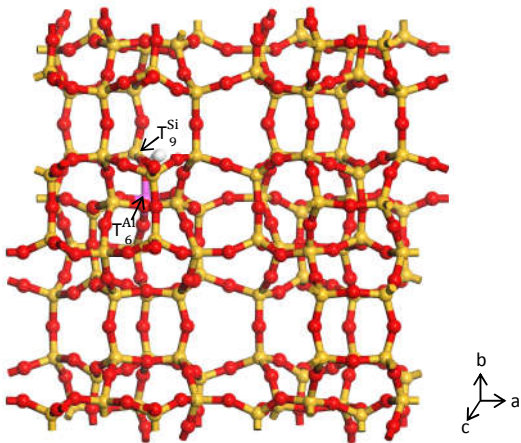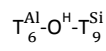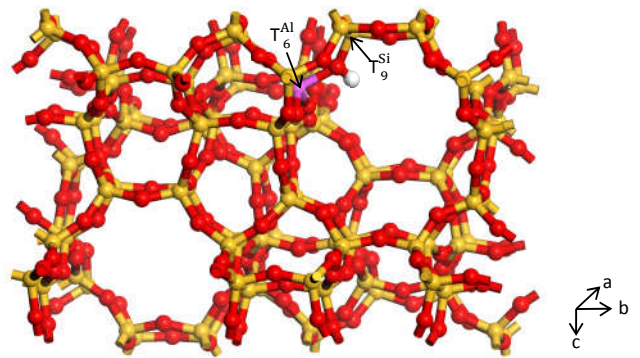

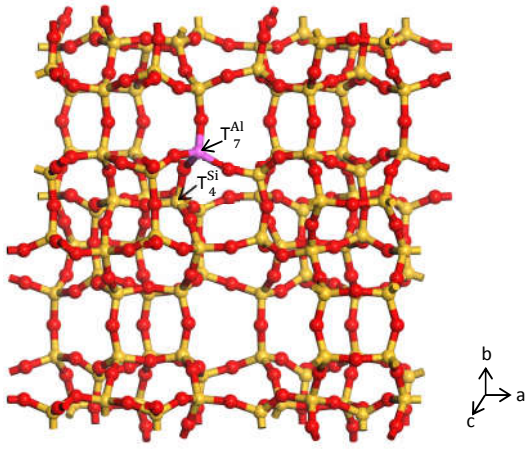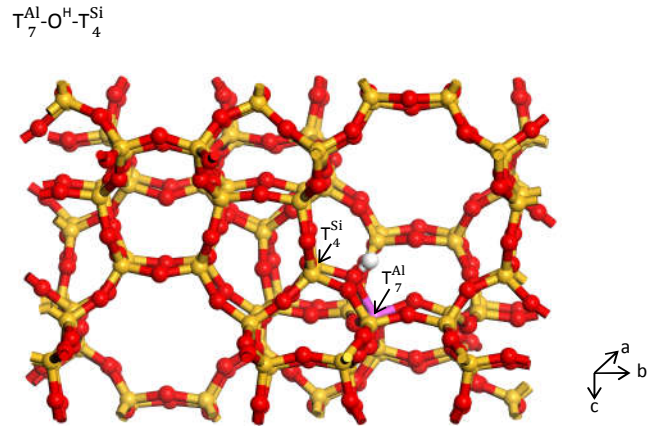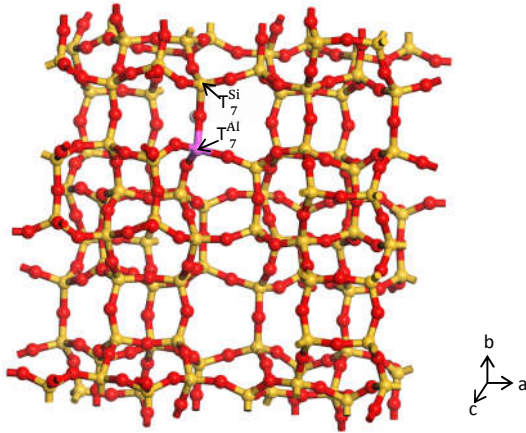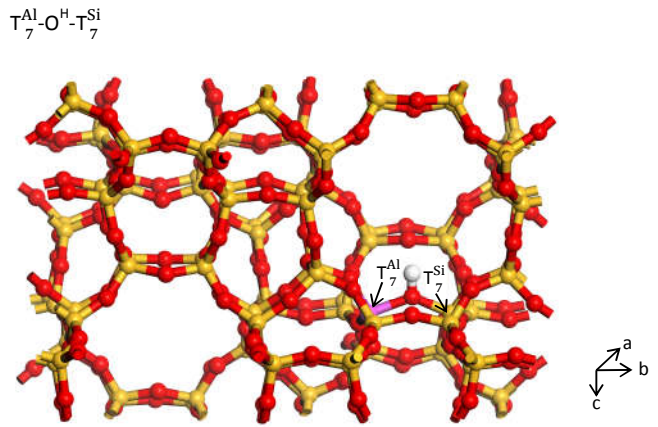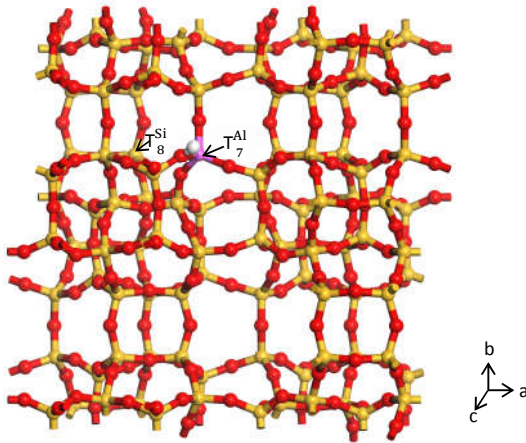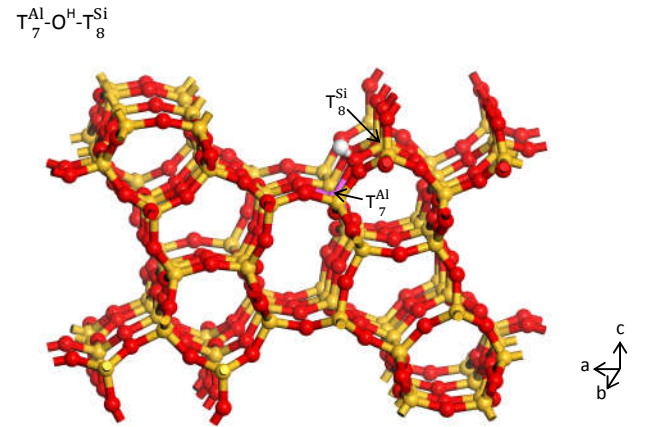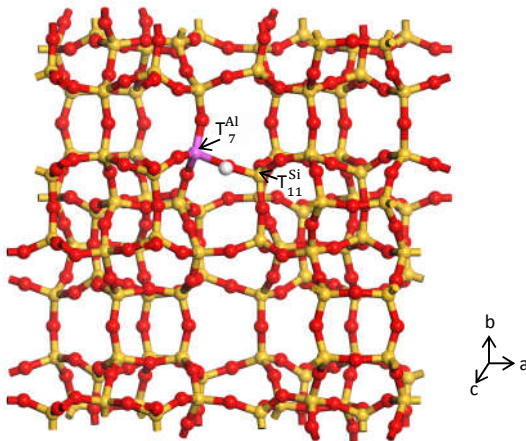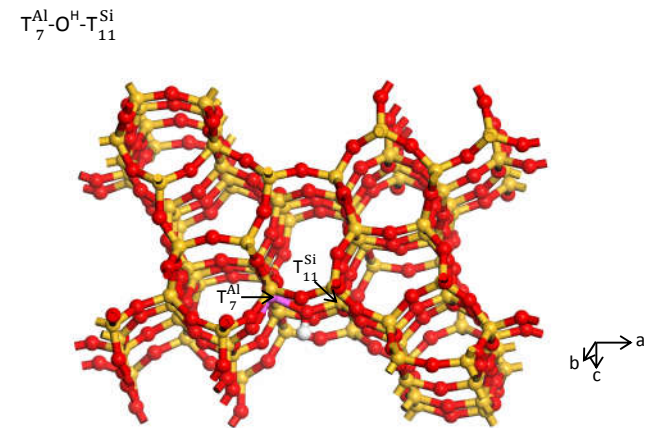

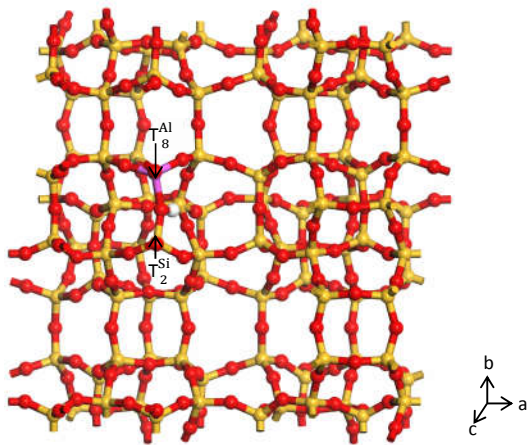

$T_8^{Al}-O^H-T_2^{Si}$

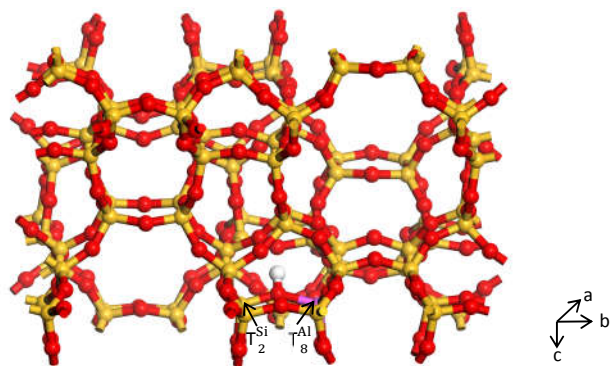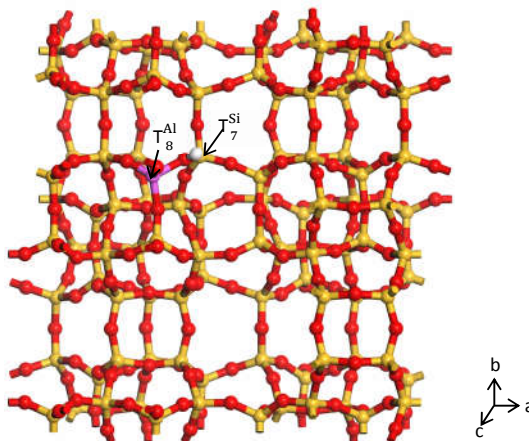

$T_8^{Al}-O^H-T_7^{Si}$

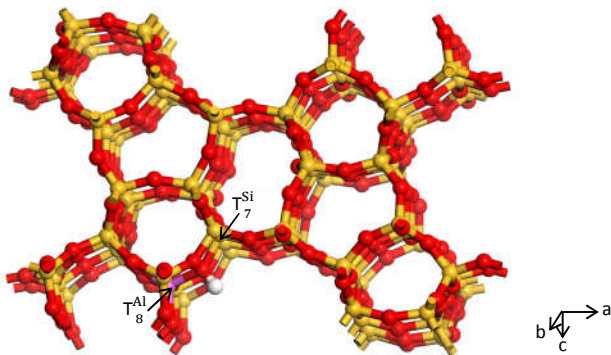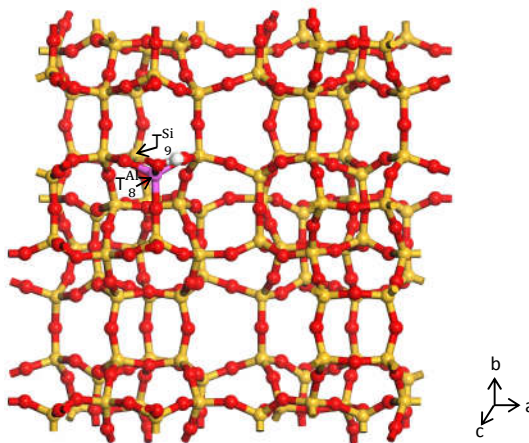

$T_8^{Al}-O^H-T_9^{Si}$

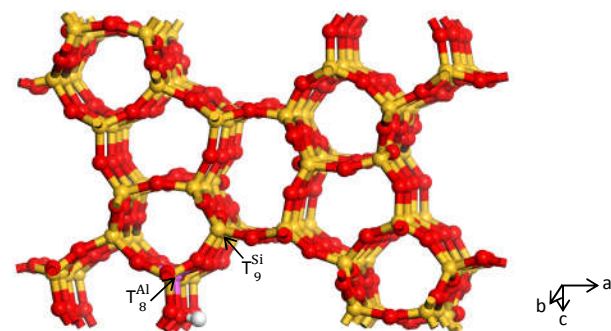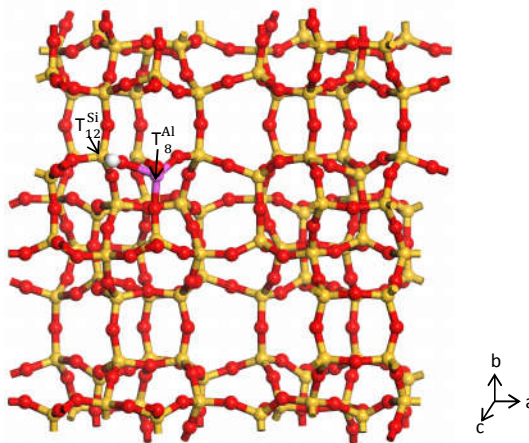

$T_8^{Al}-O^H-T_{12}^{Si}$

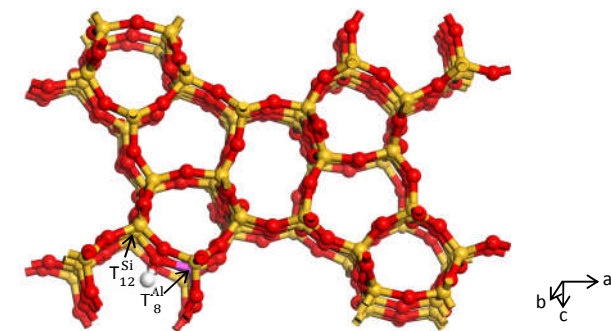



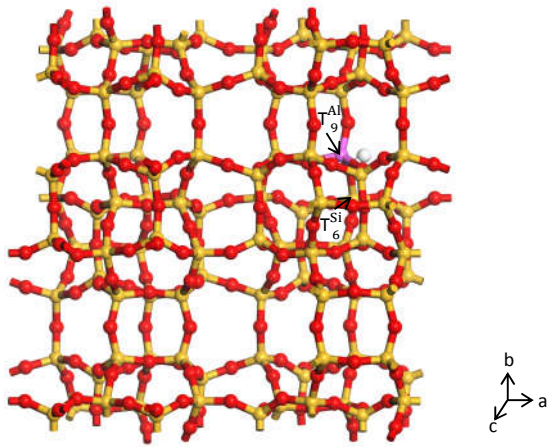

$T_{9}^{Al}-O^{H}-T_{6}^{Si}$

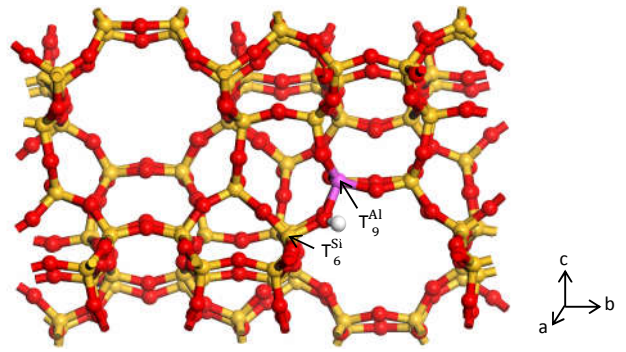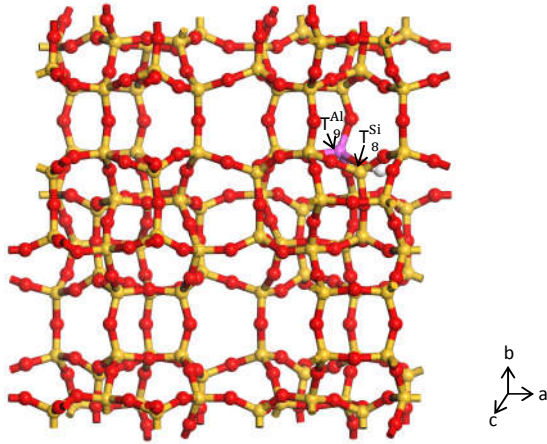

$T_{9}^{Al}-O^{H}-T_{8}^{Si}$

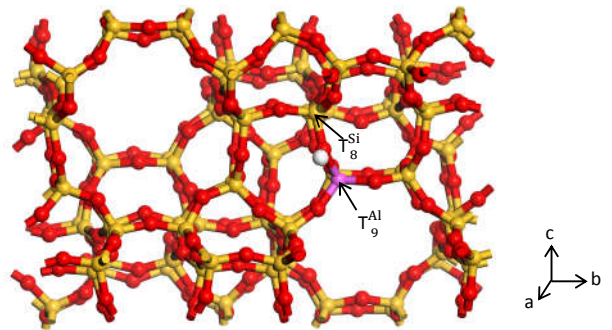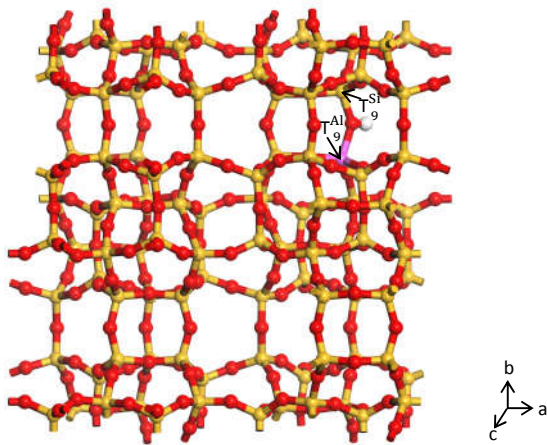

$T_{9}^{Al}-O^{H}-T_{9}^{Si}$

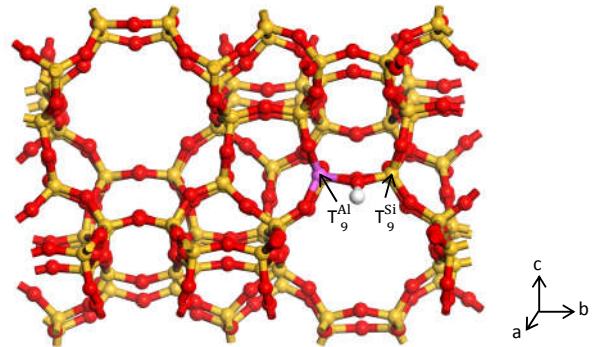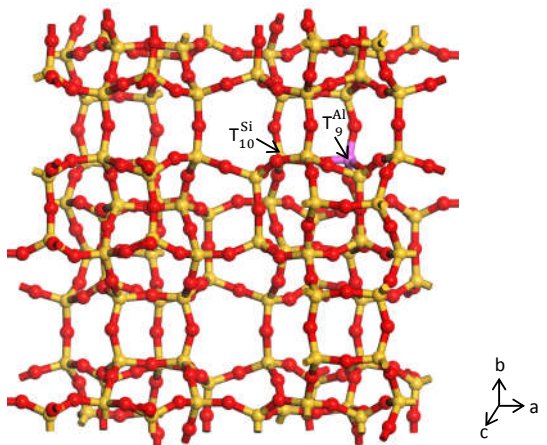

$T_{9}^{Al}-O^{H}-T_{10}^{Si}$

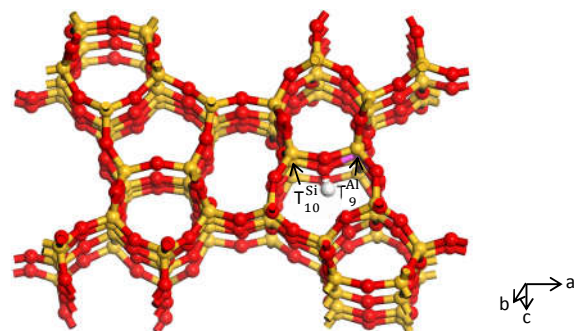

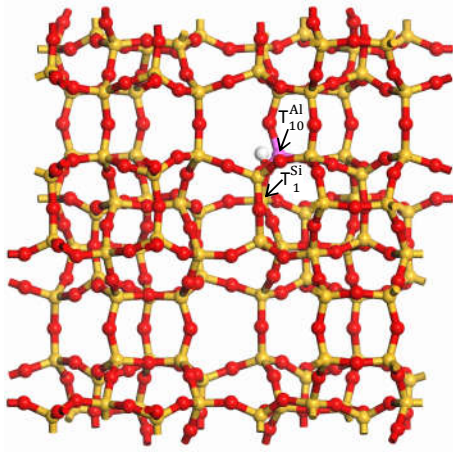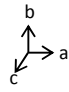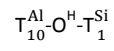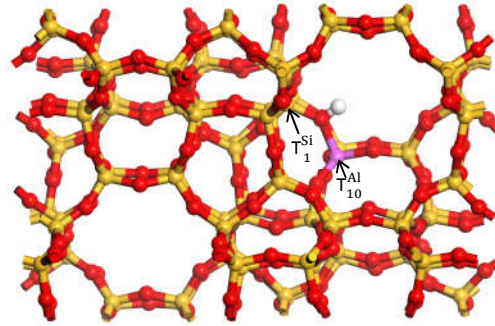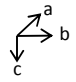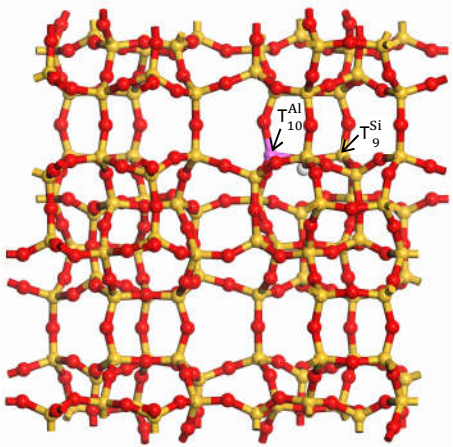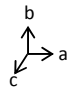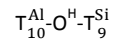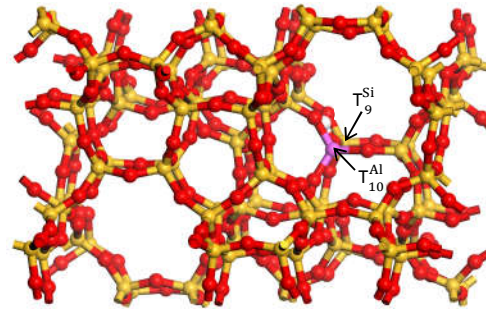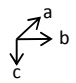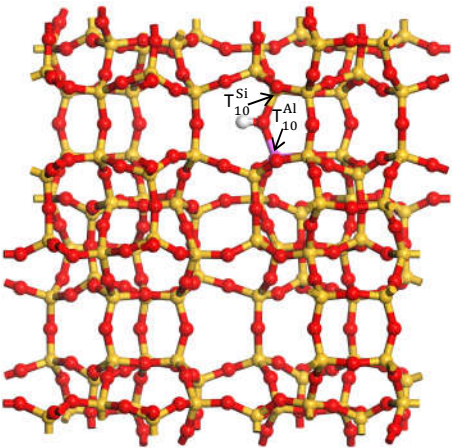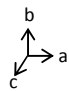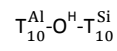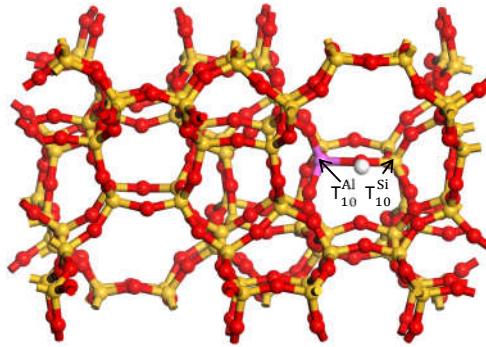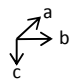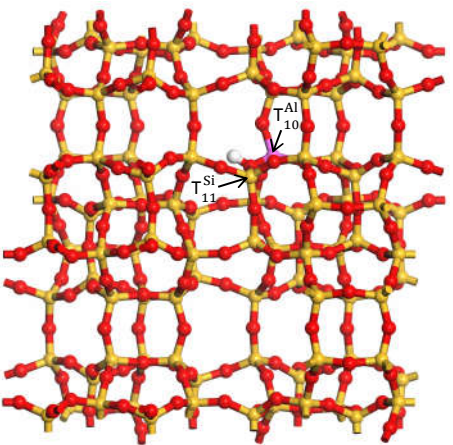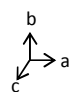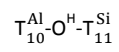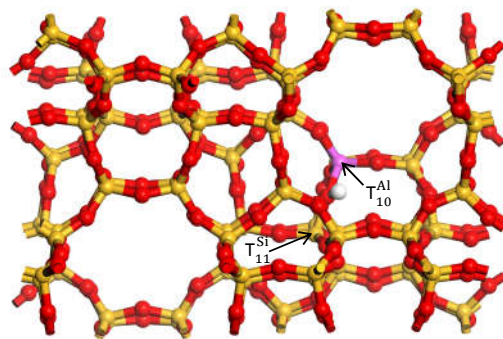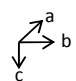

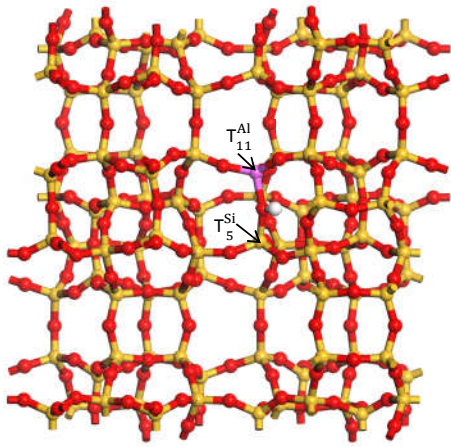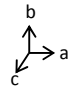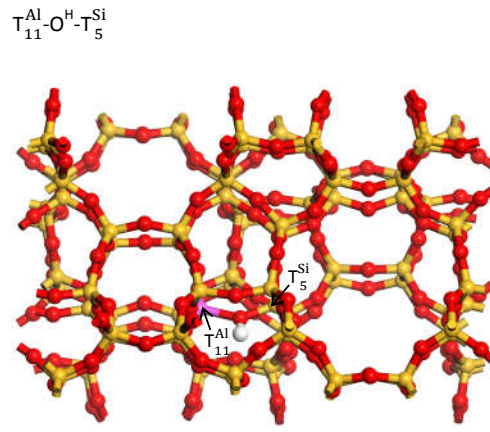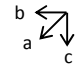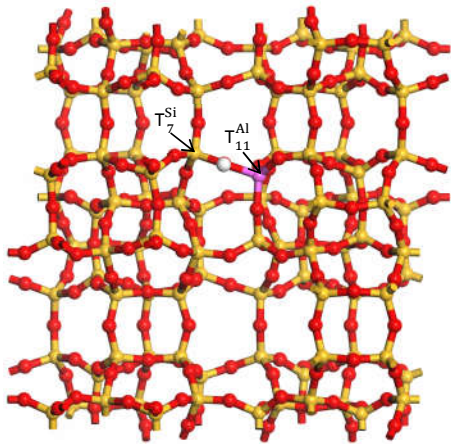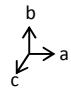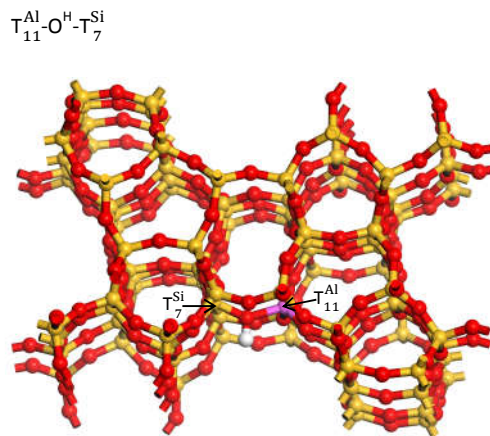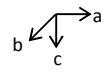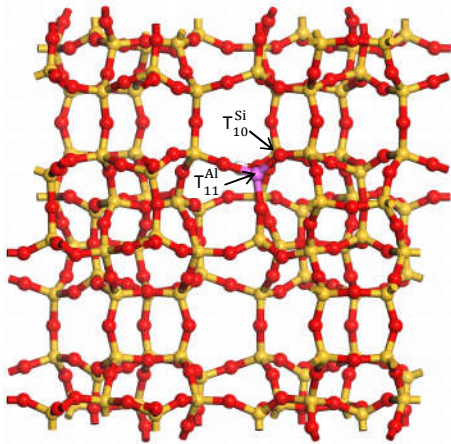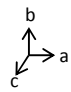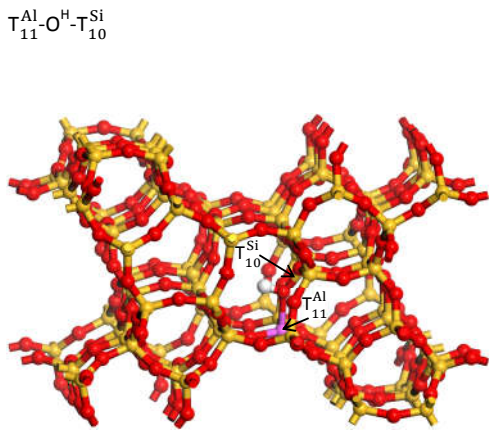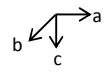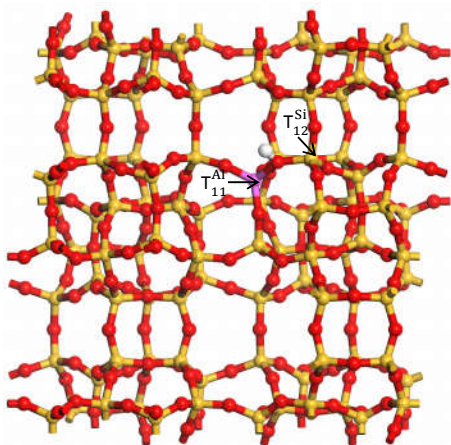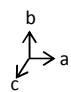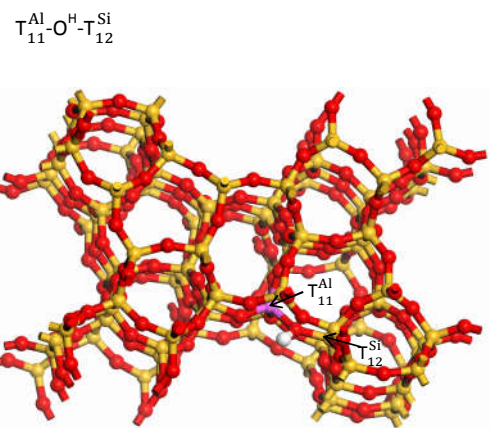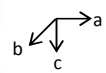

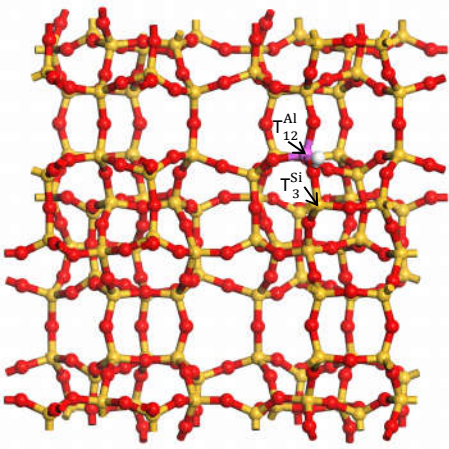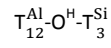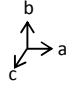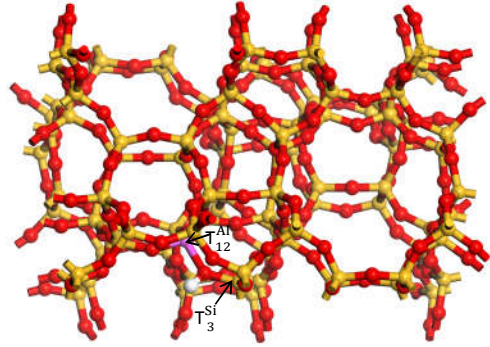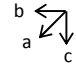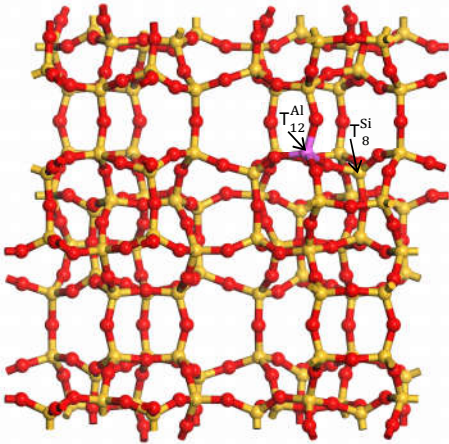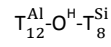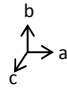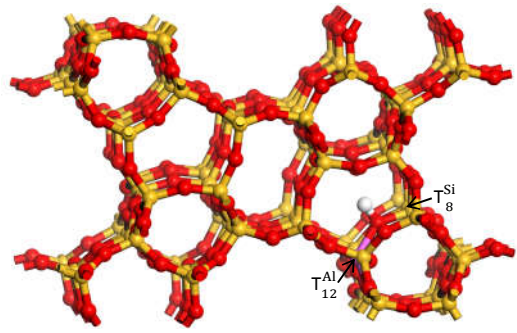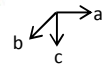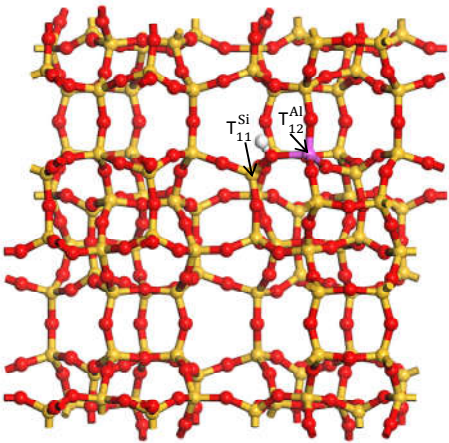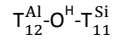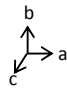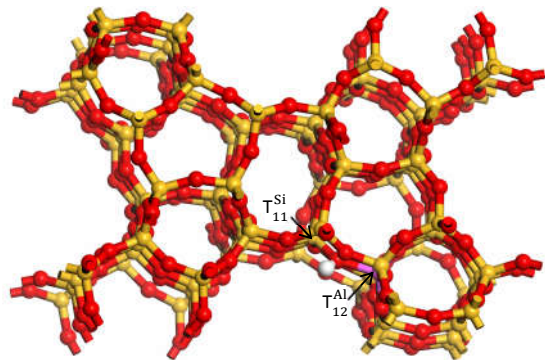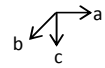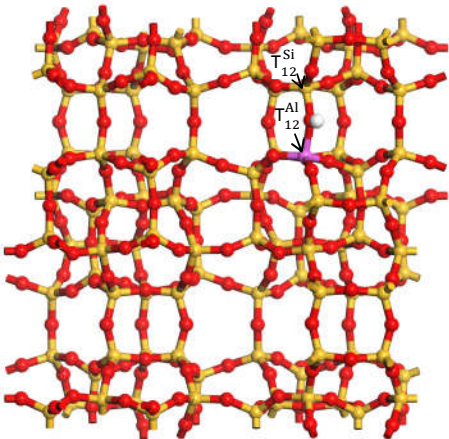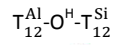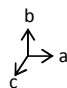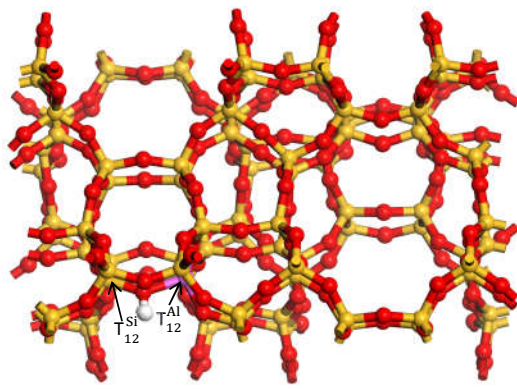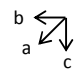

Figure S1 The optimized configurations of all 48 acidic sites for one Al substitution in the framework

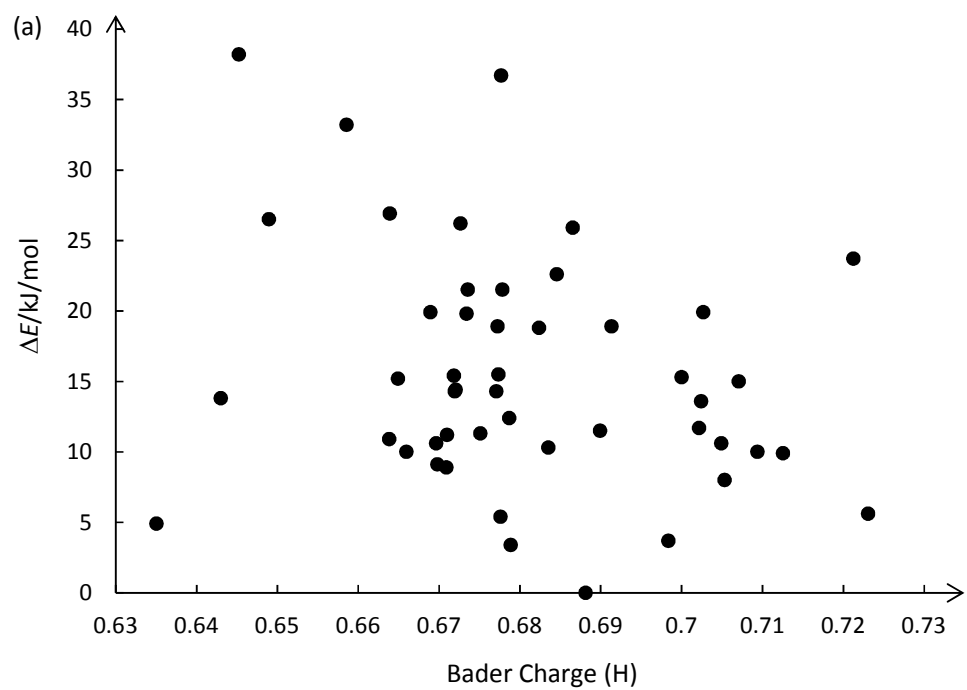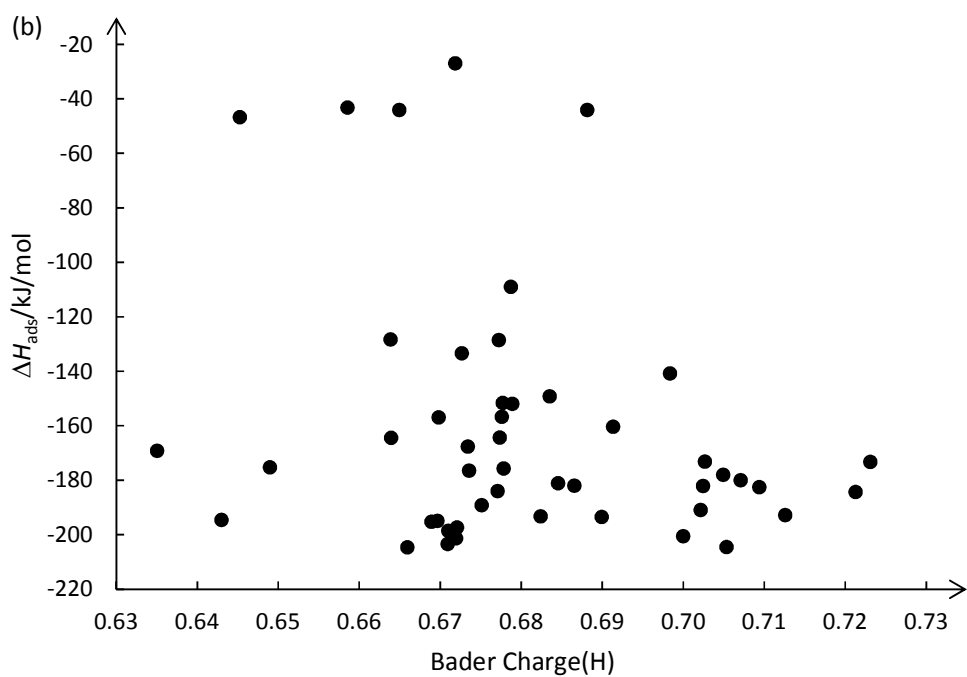

Figure S2 Calculated Bader charge as a function of (a) relative energy  $\Delta E$  of all 48 acid sites and (b) pyridine adsorption enthalpy  $\Delta H_{\text{ads}}$

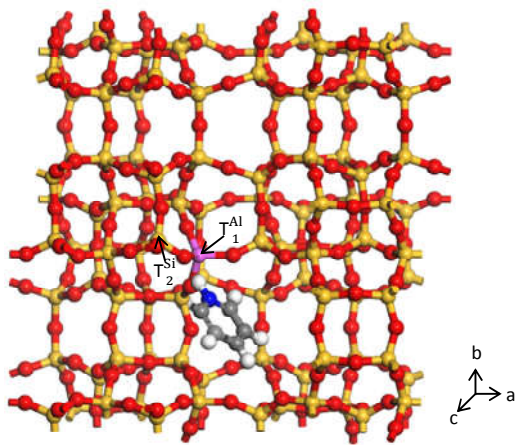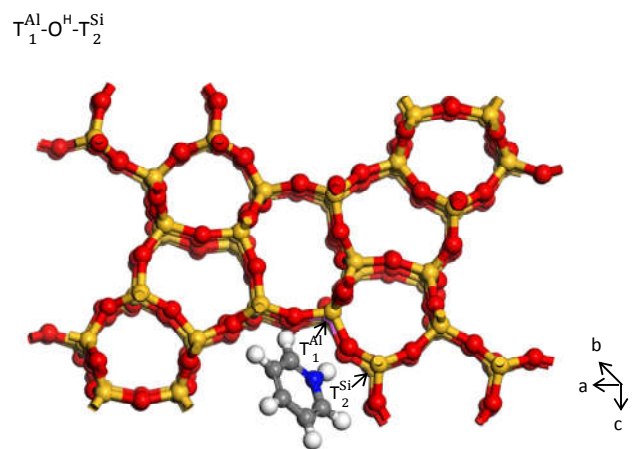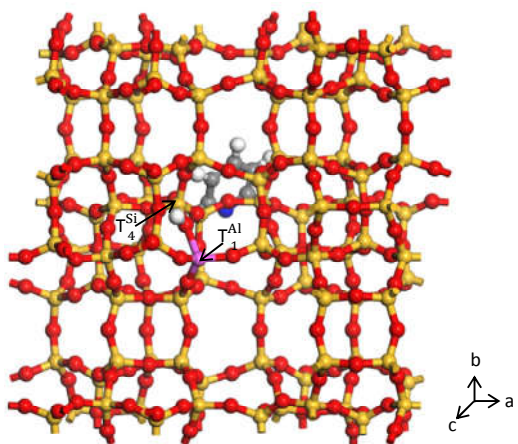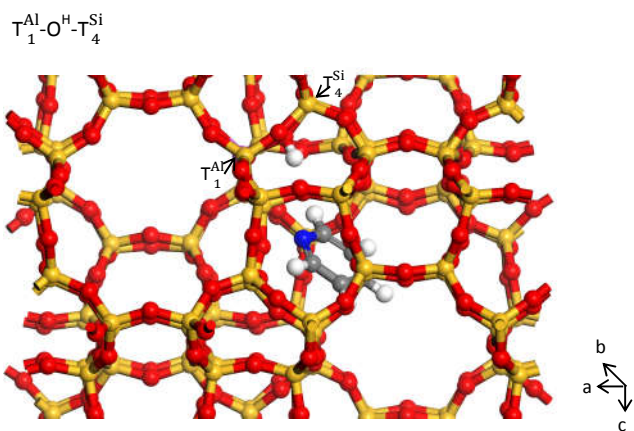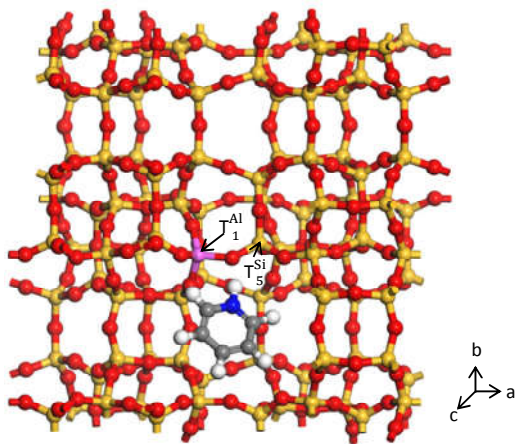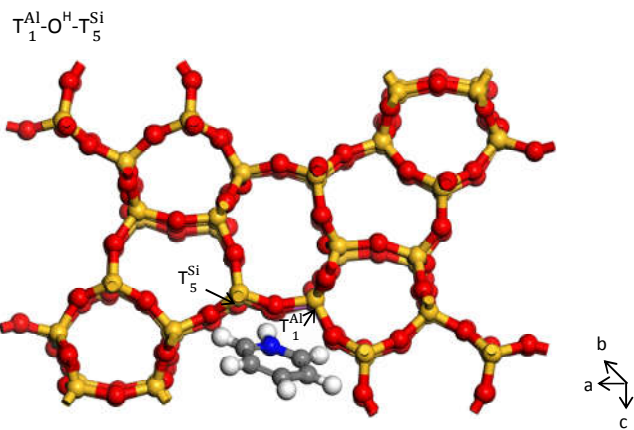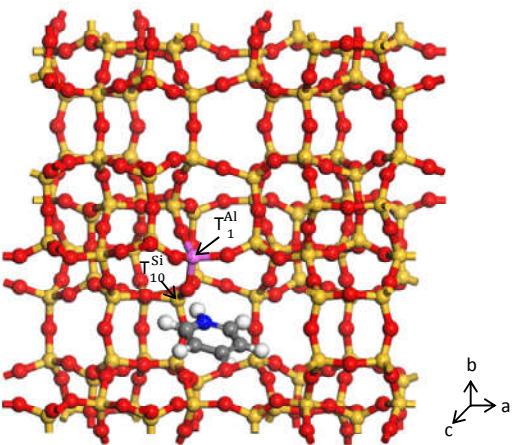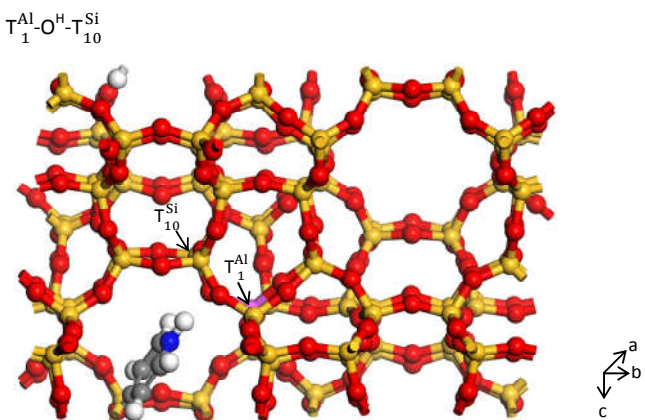

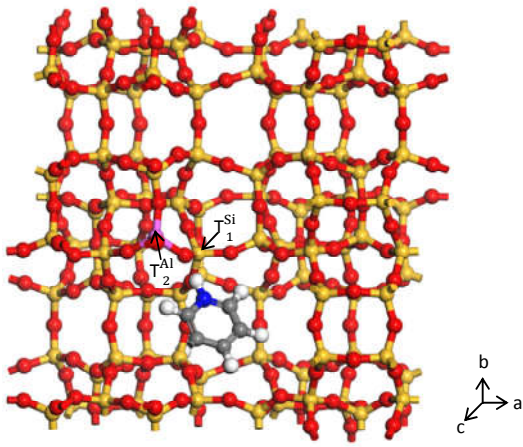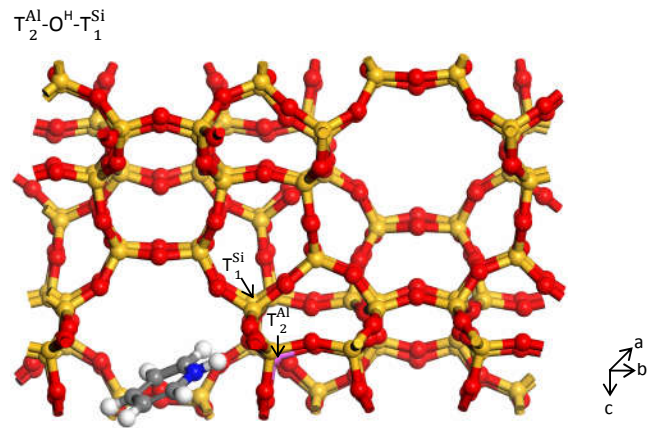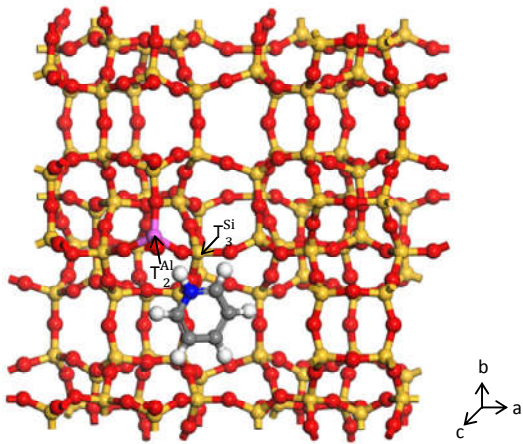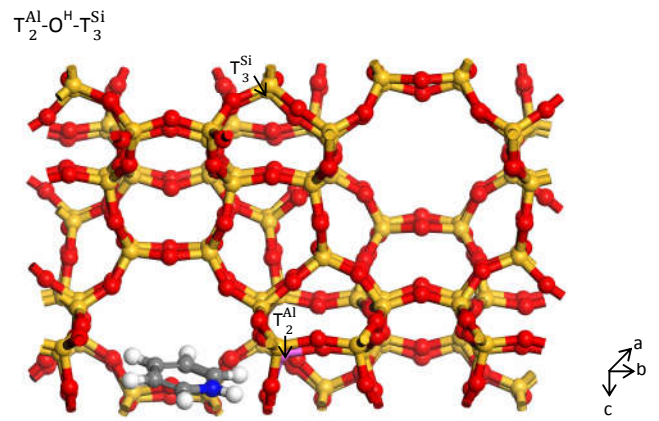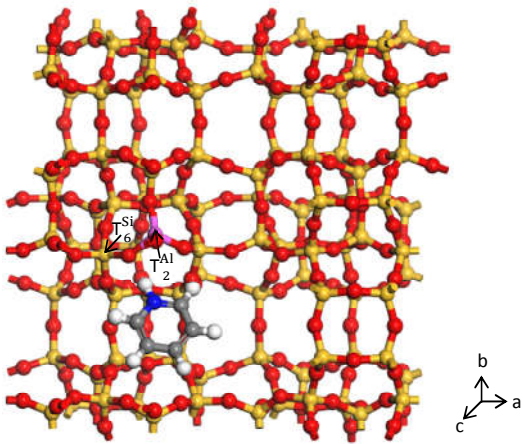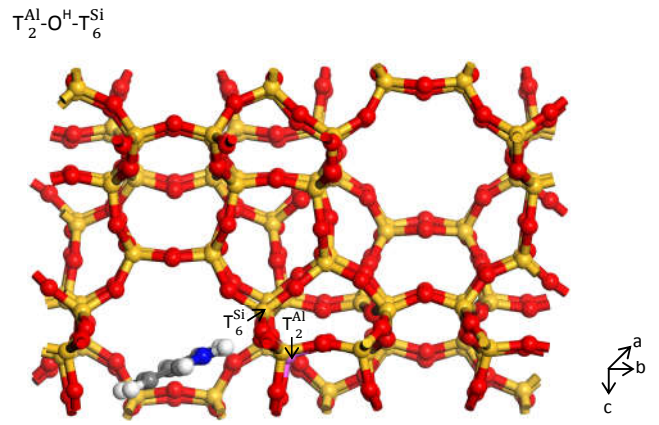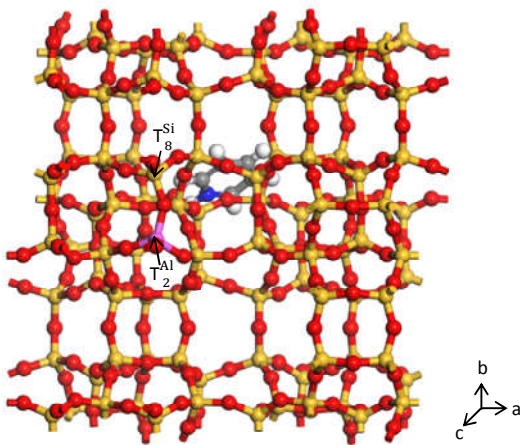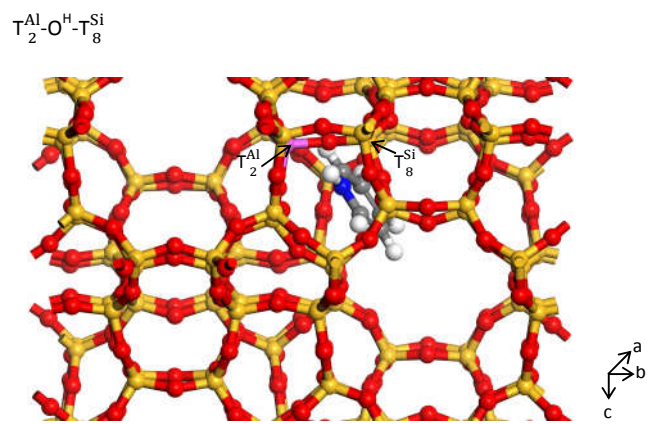

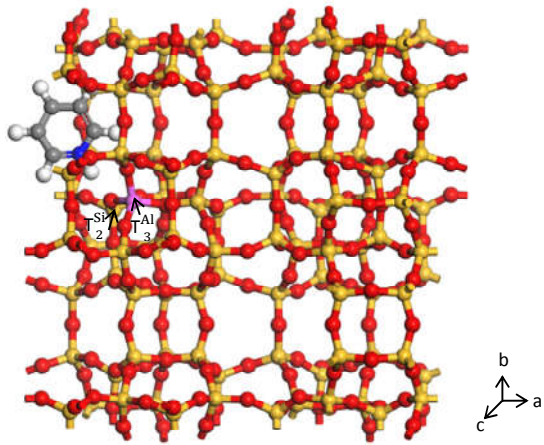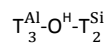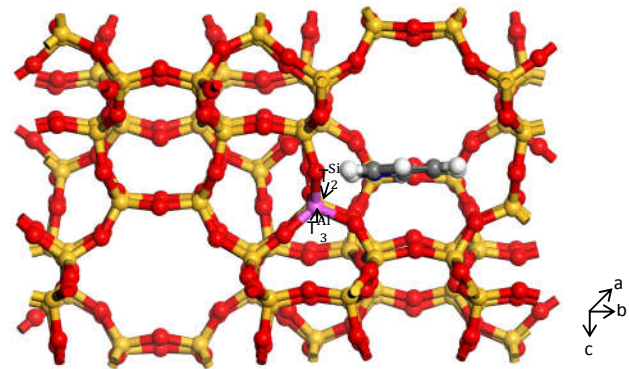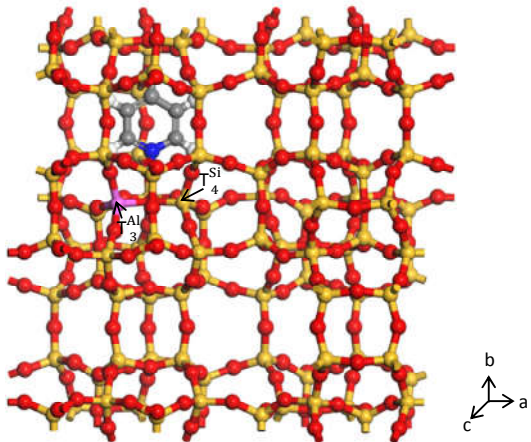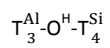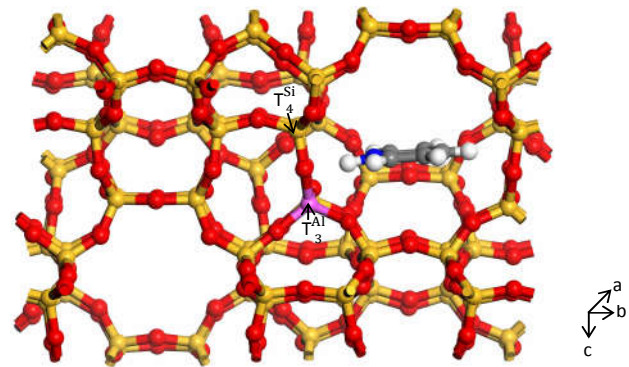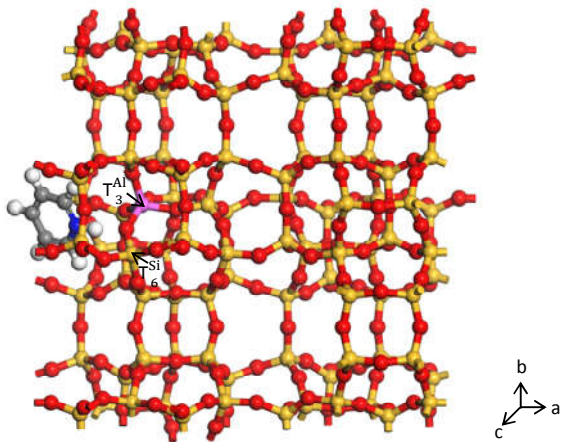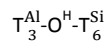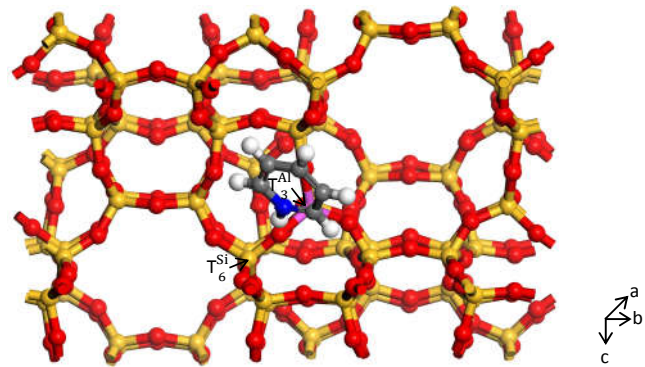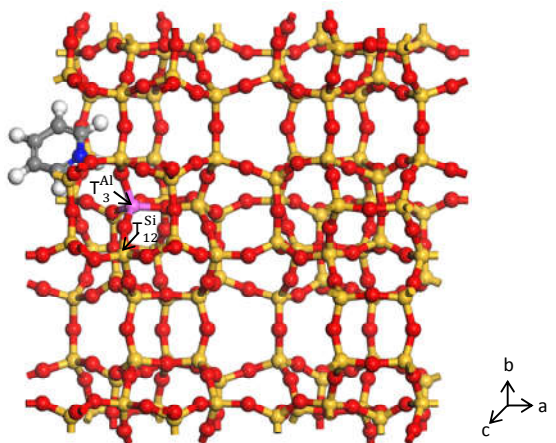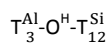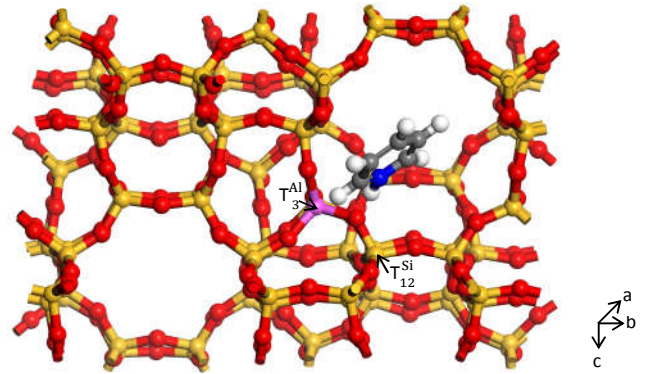



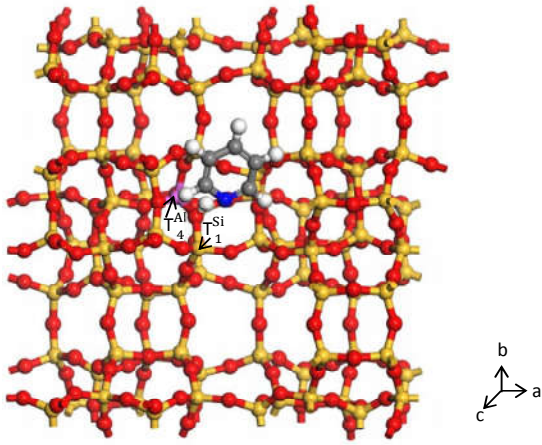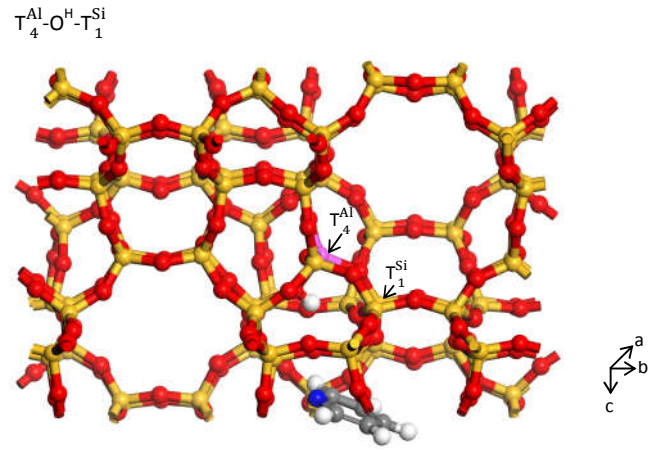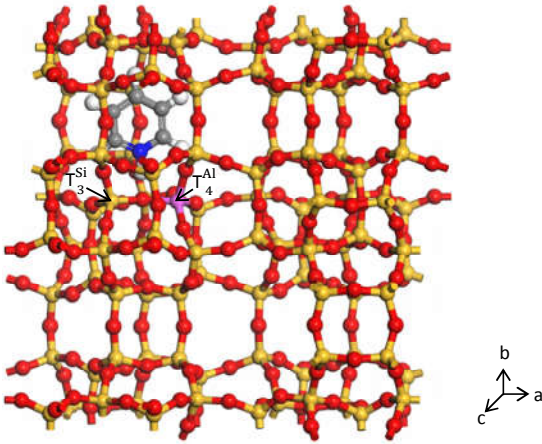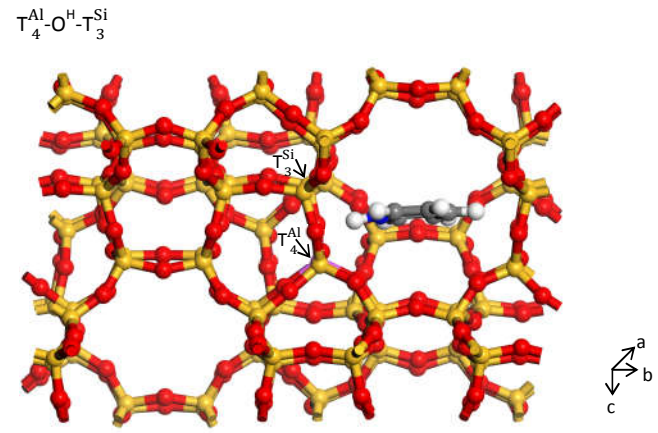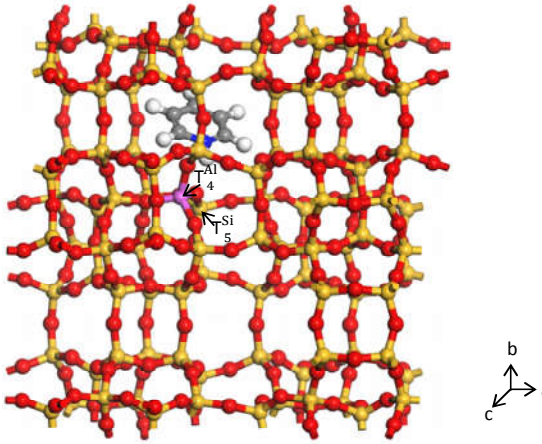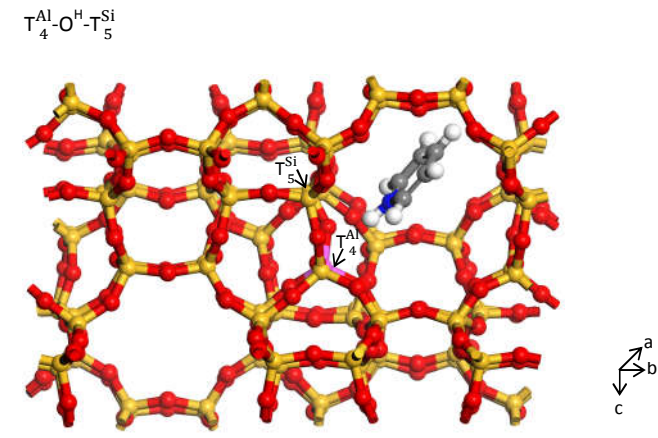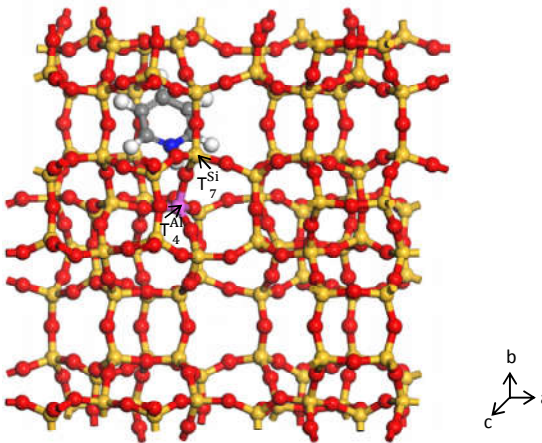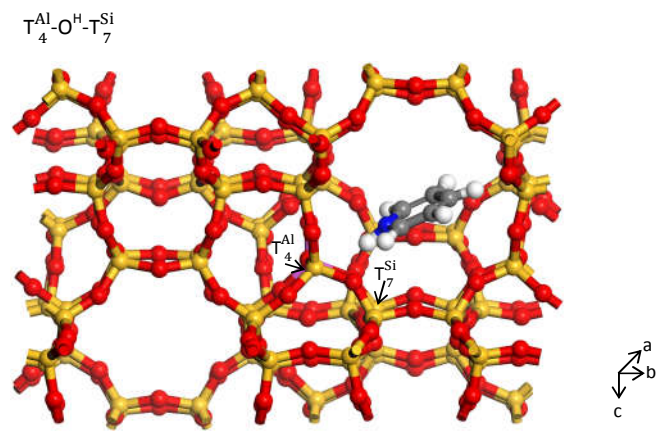

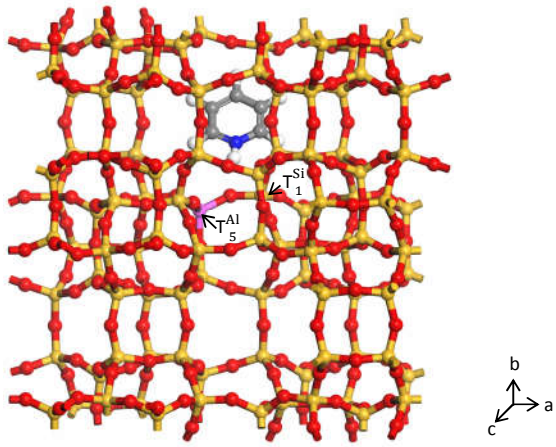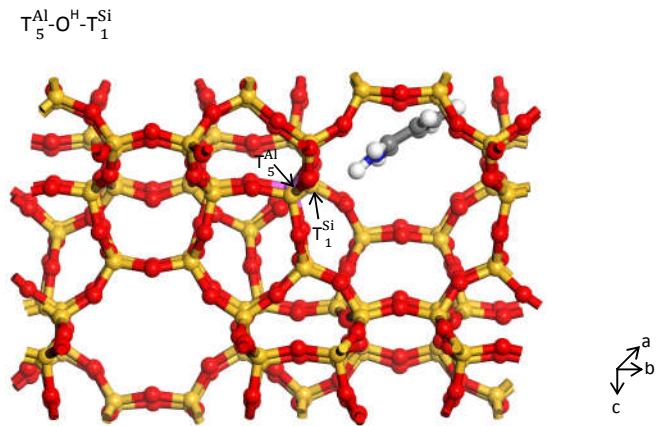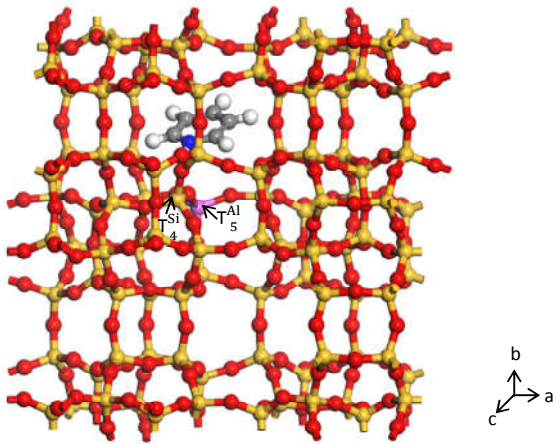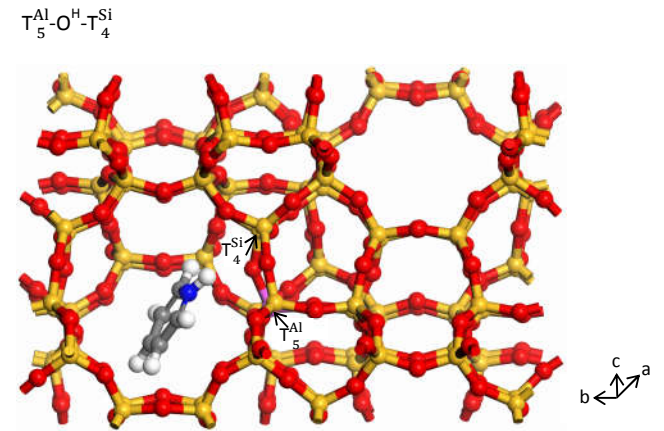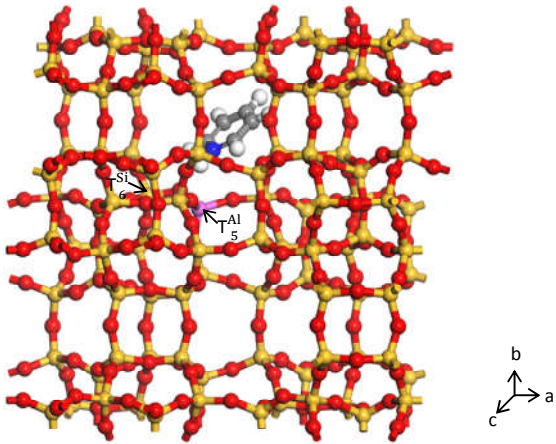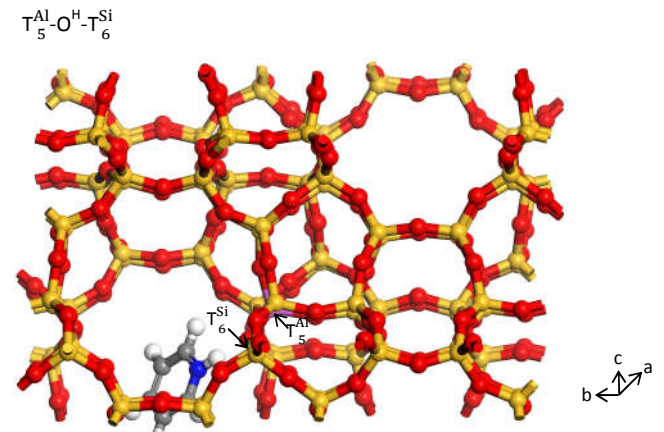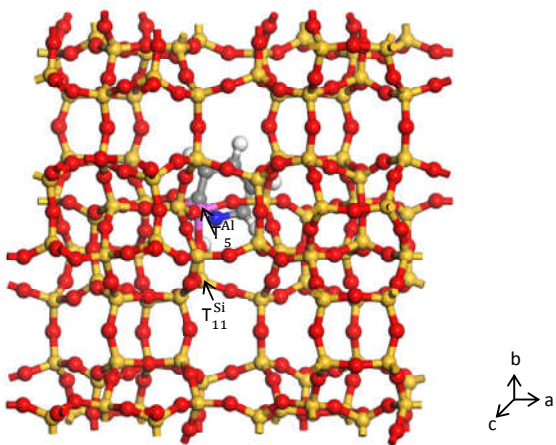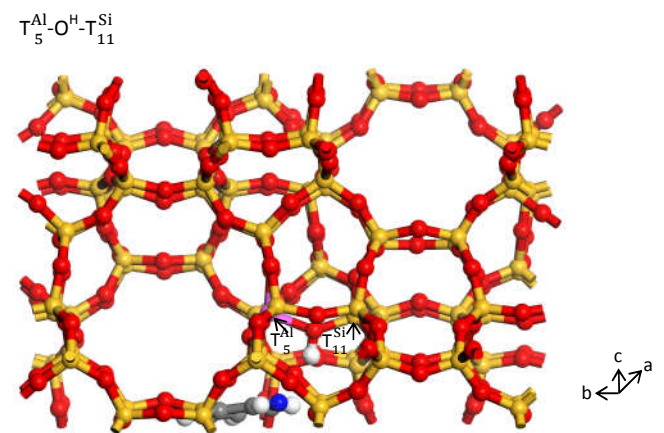

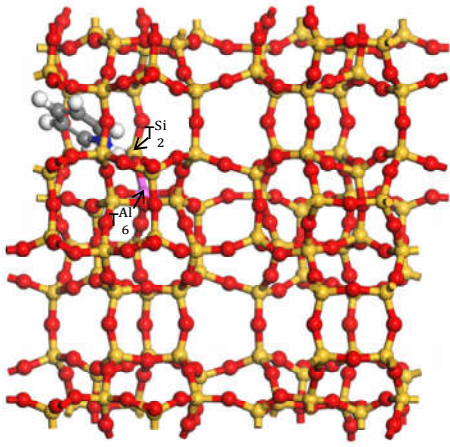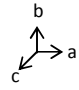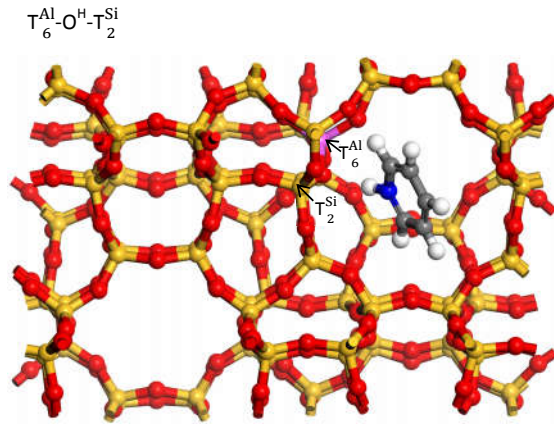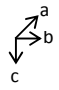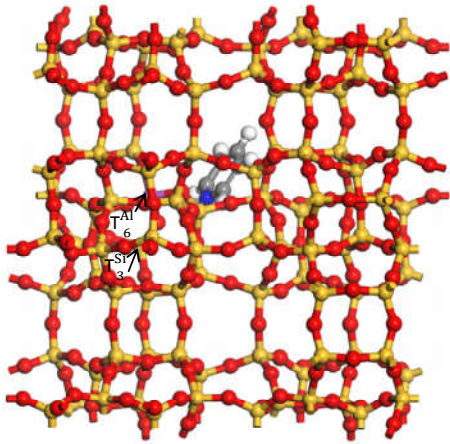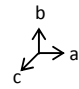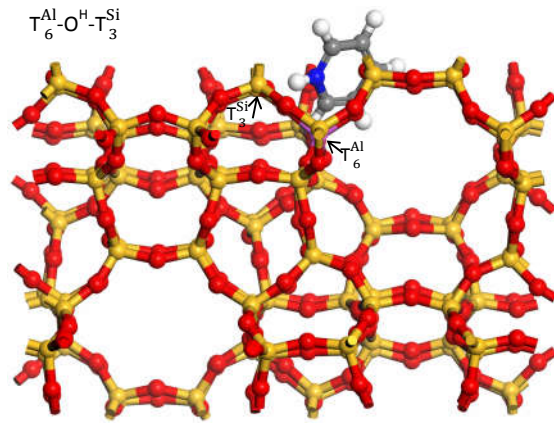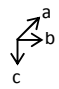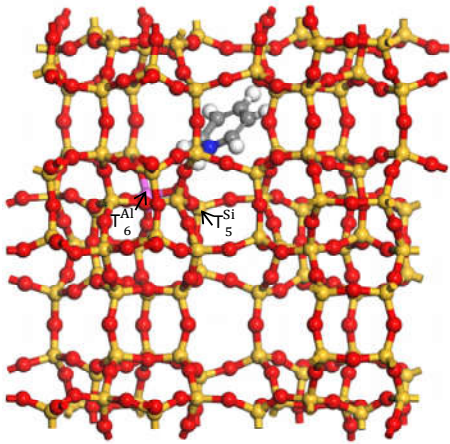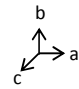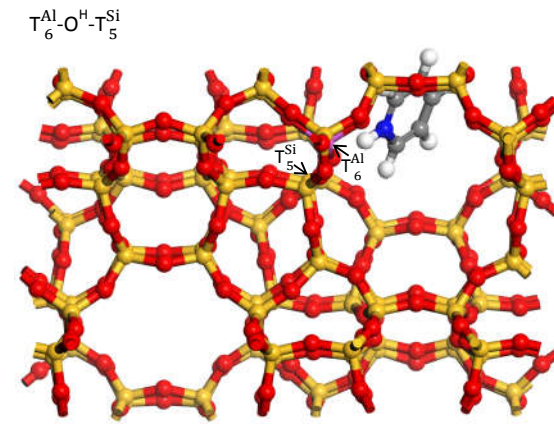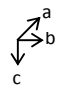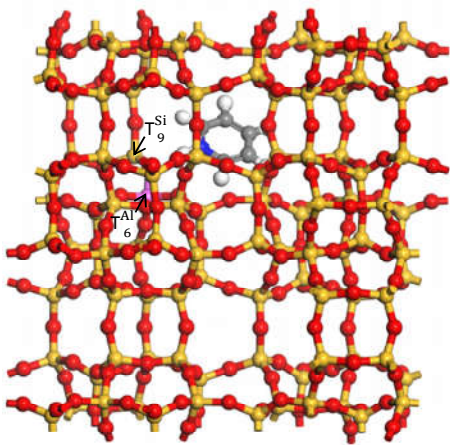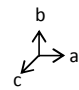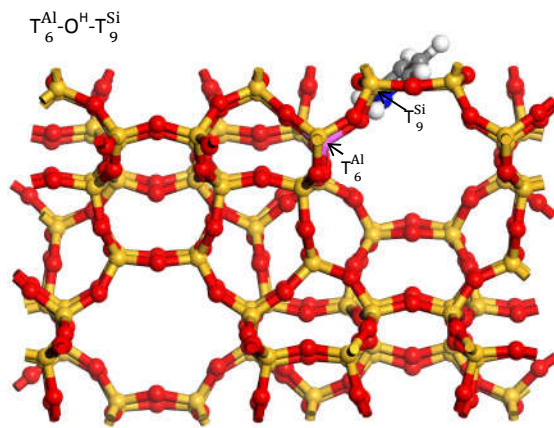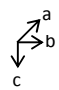

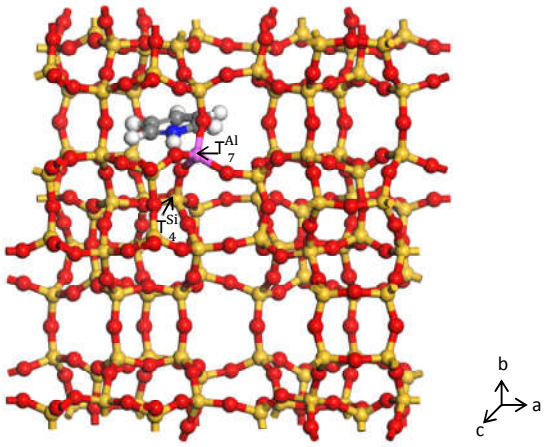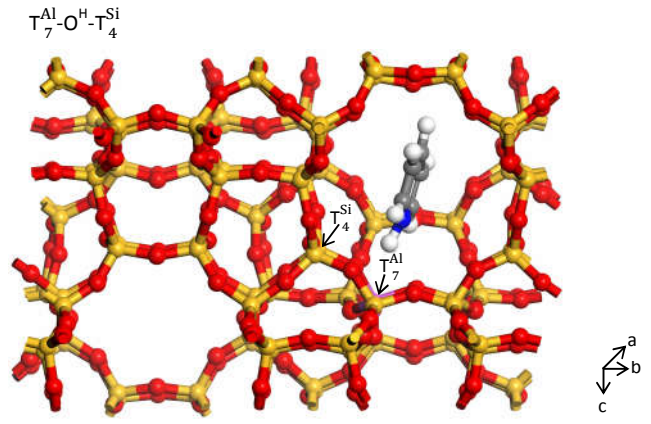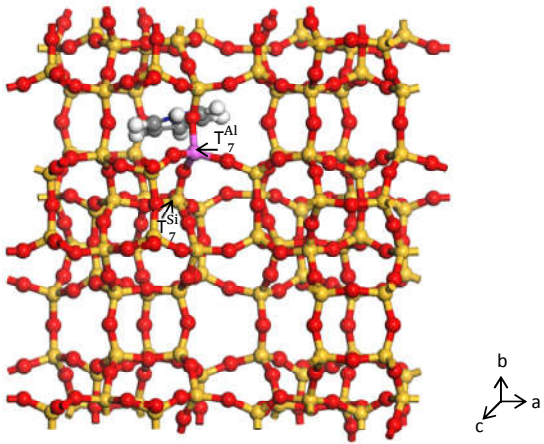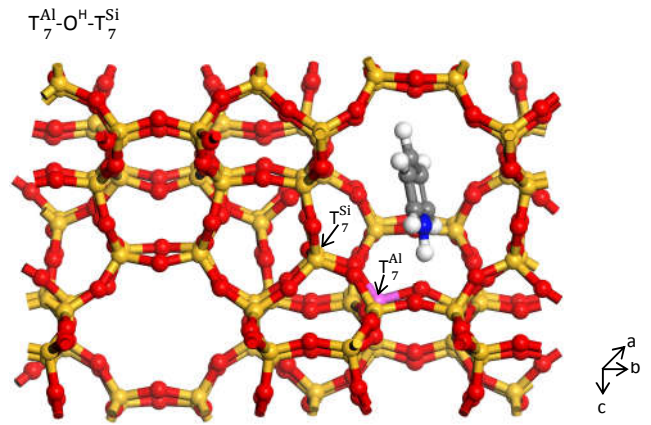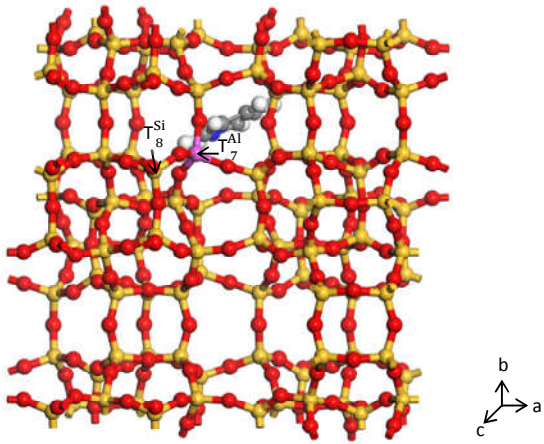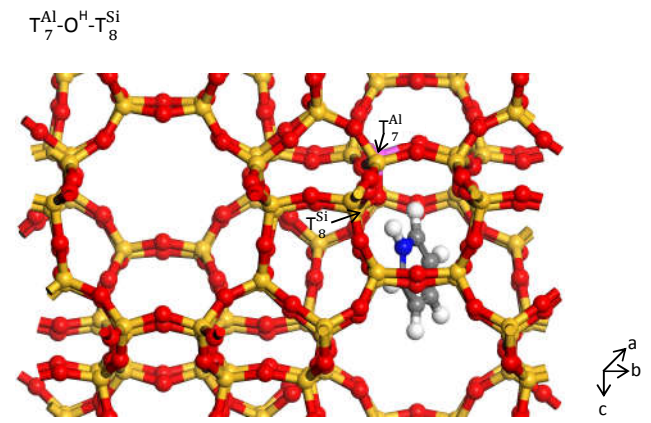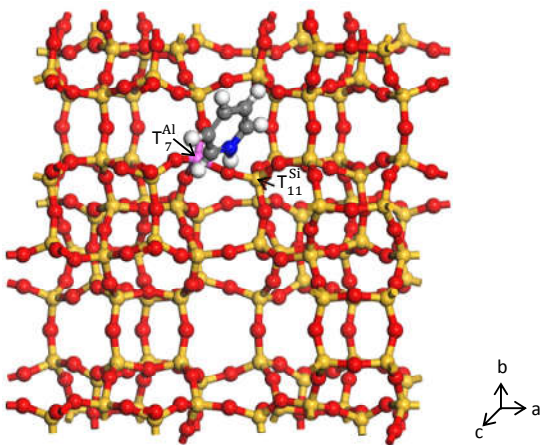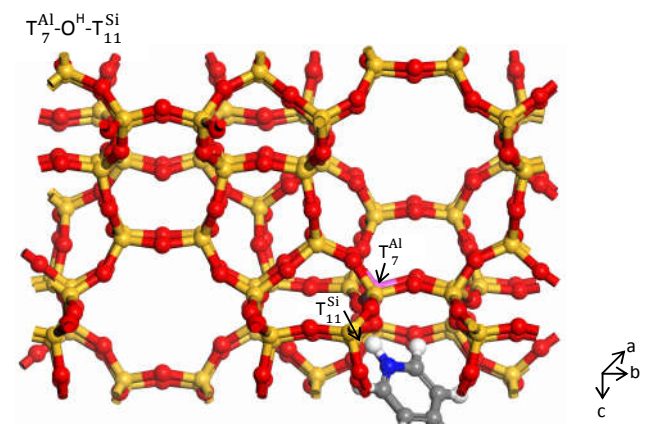

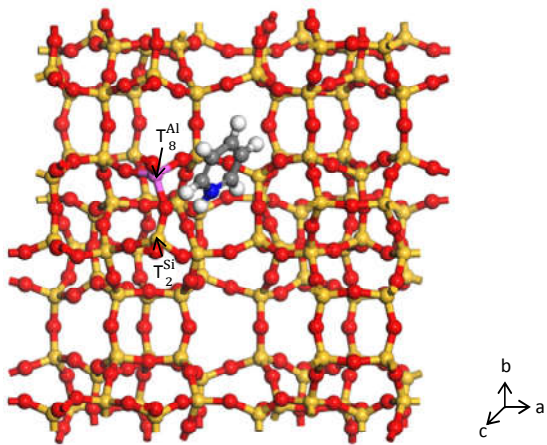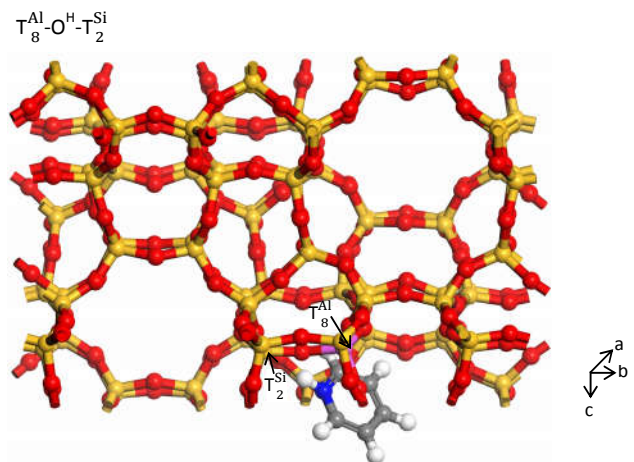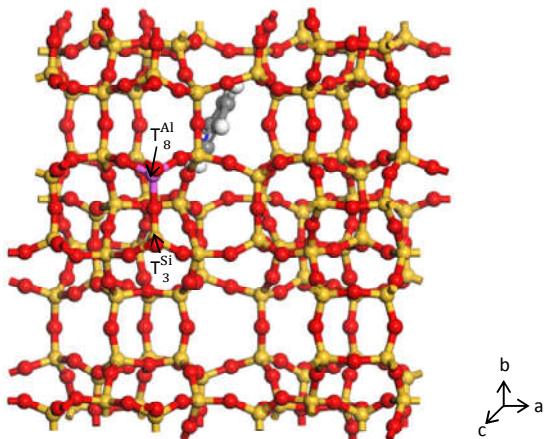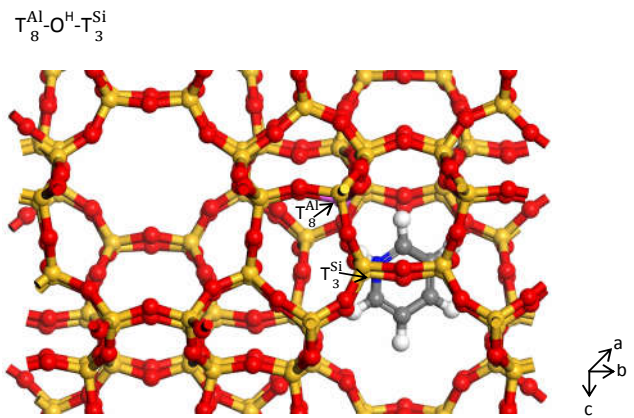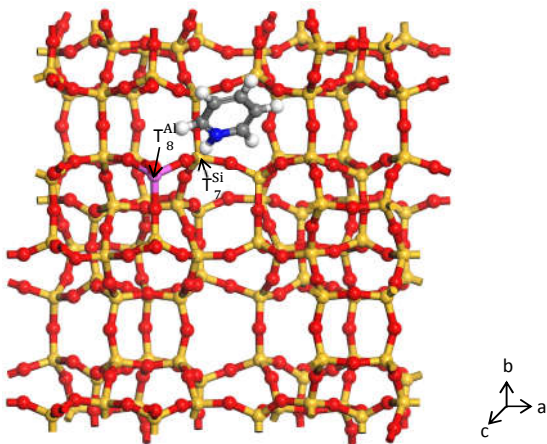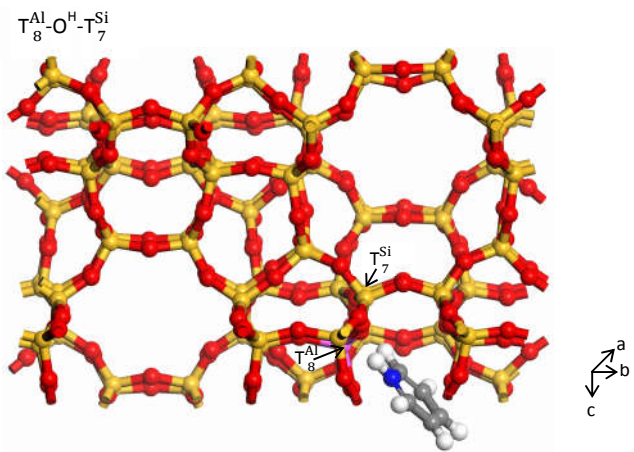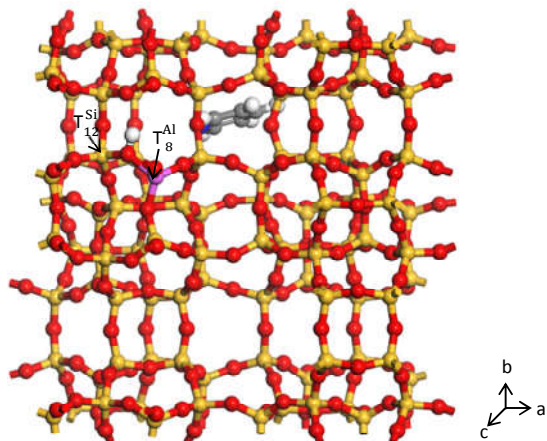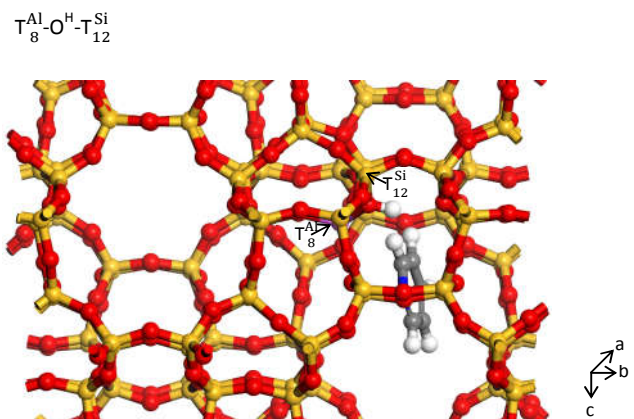

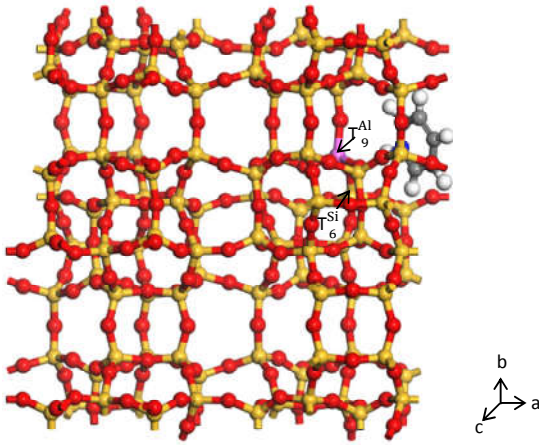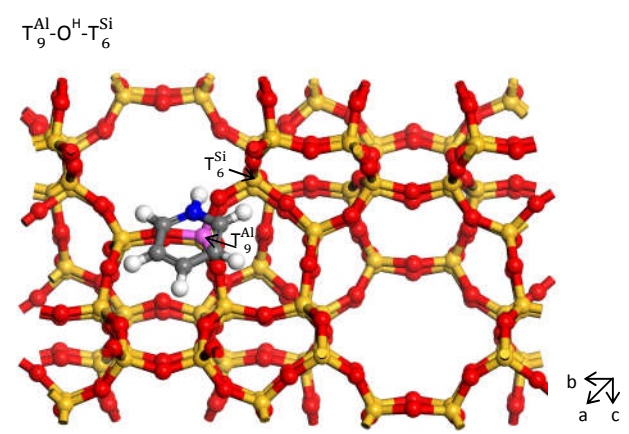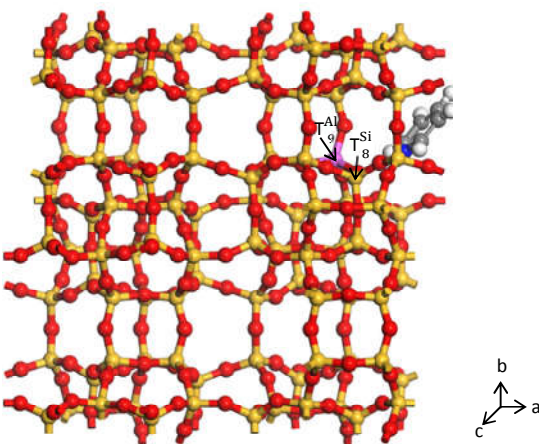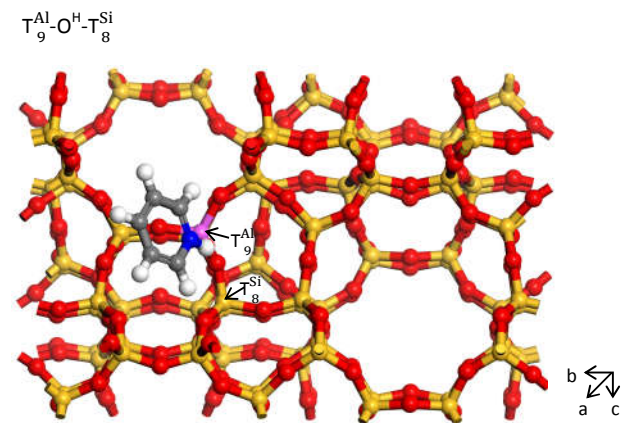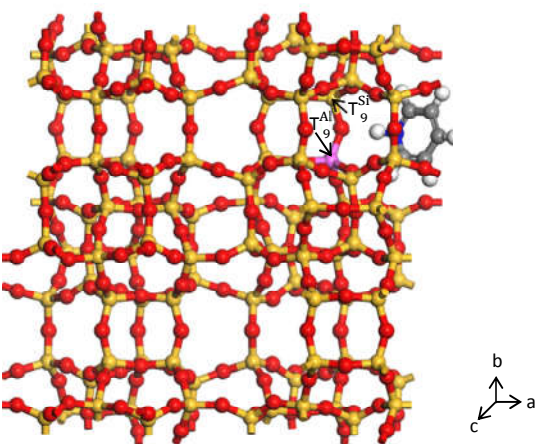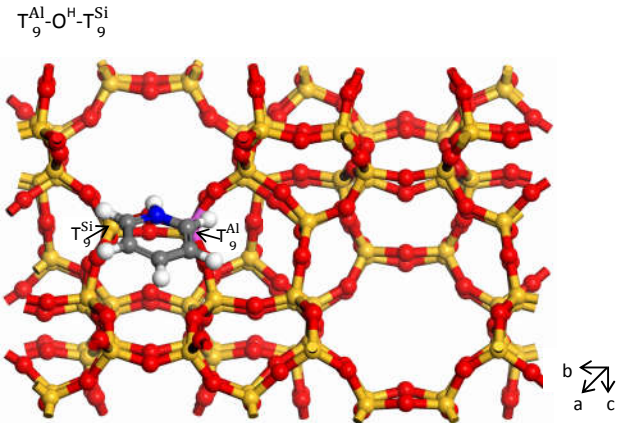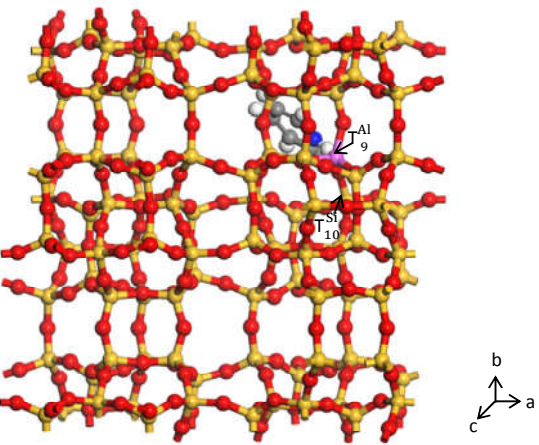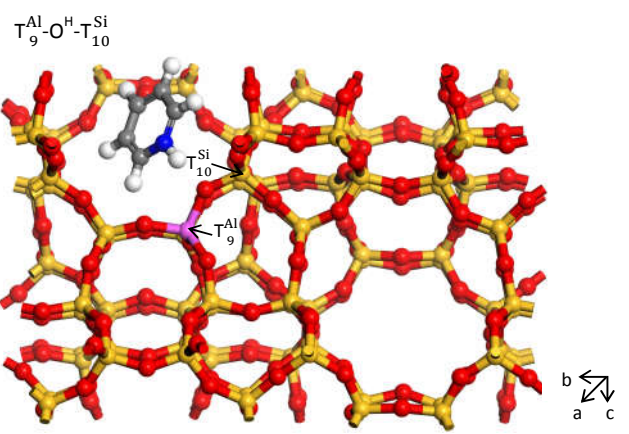

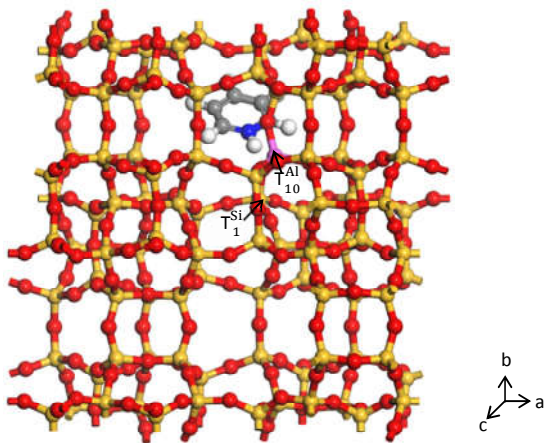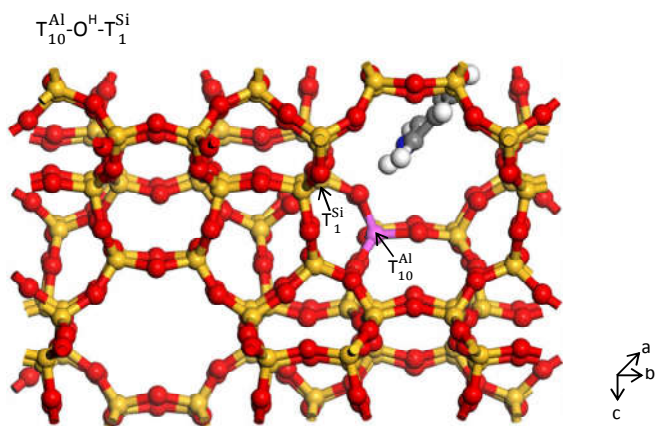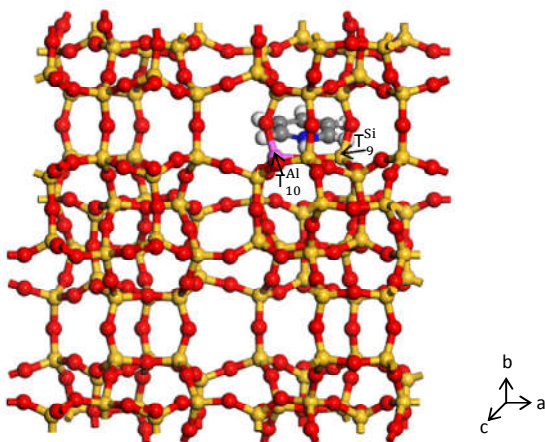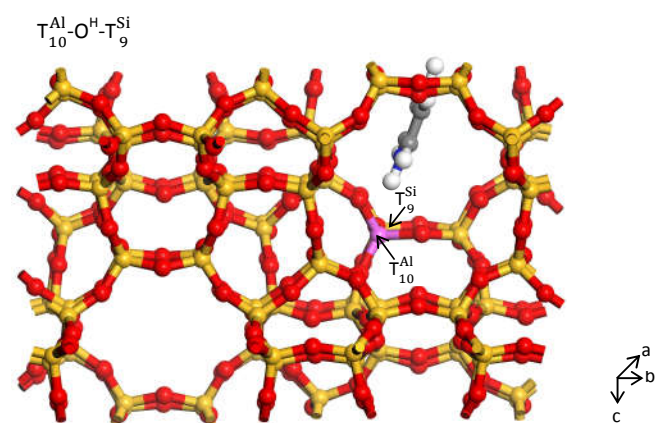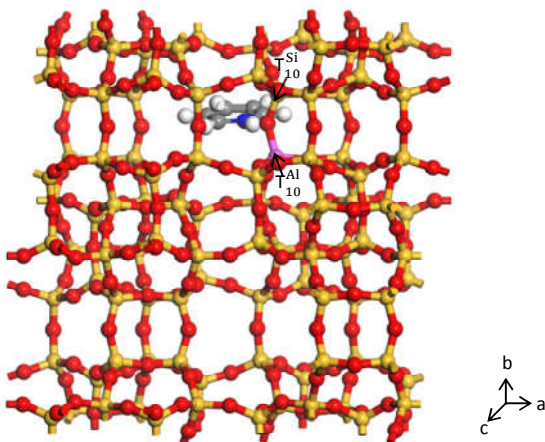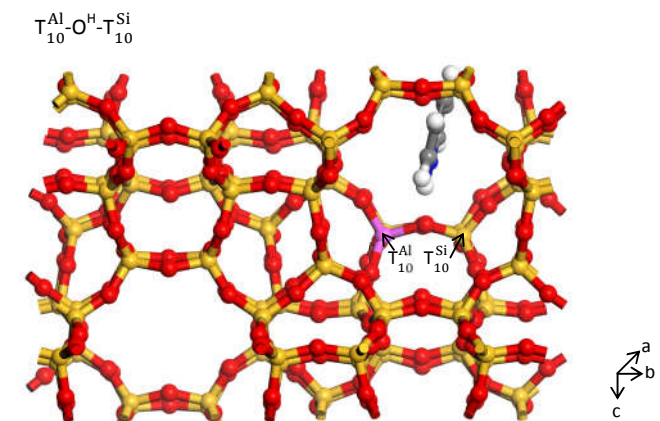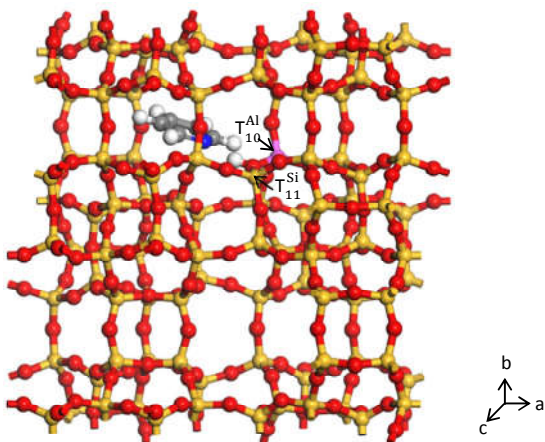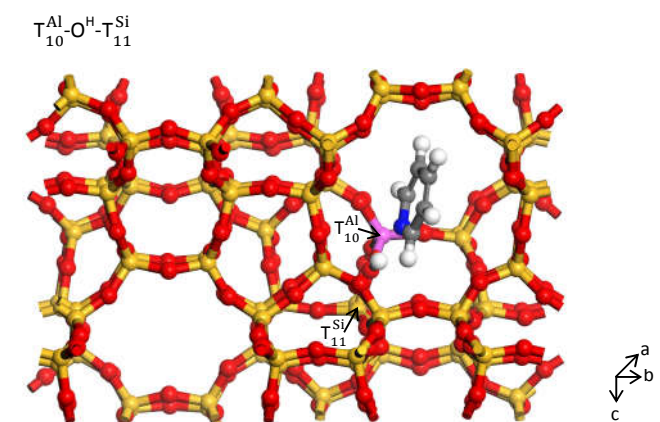

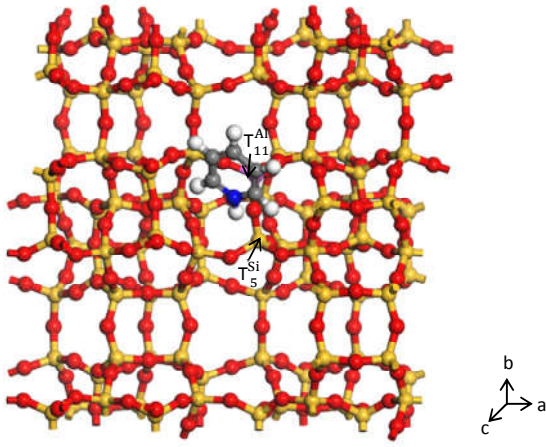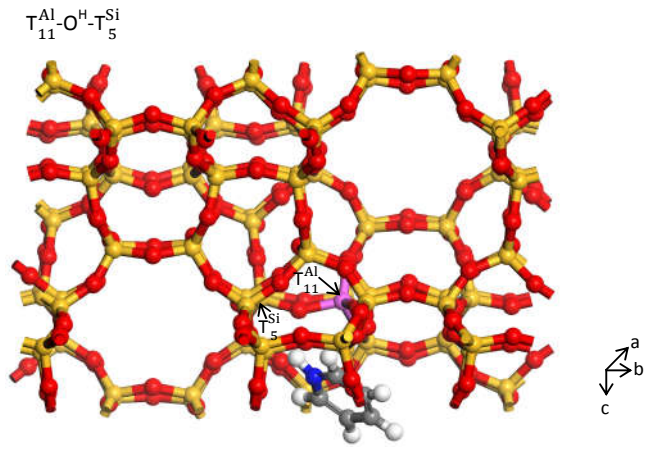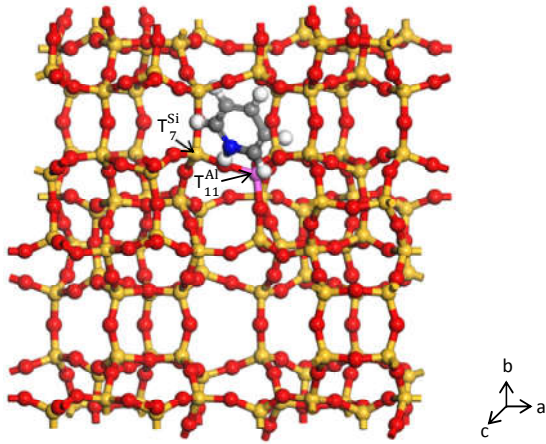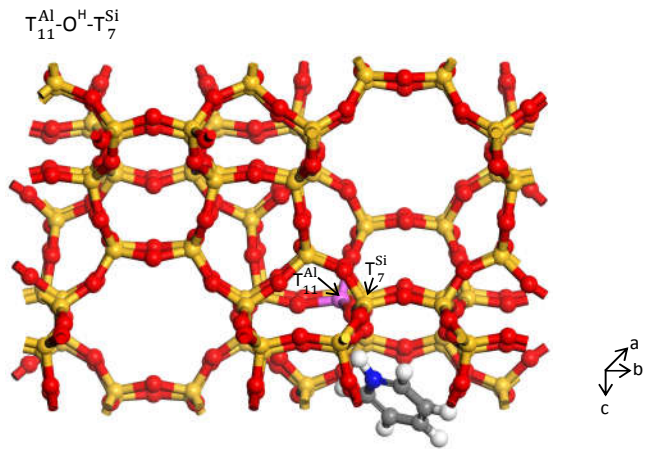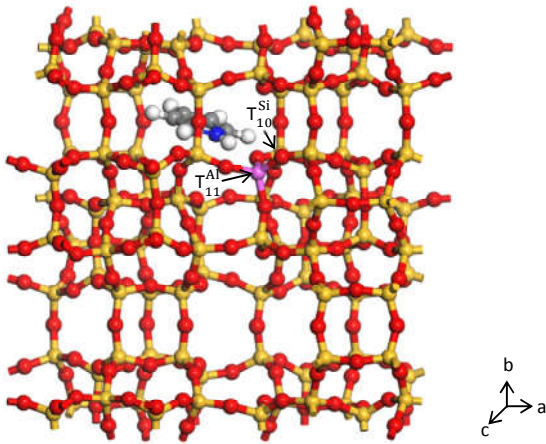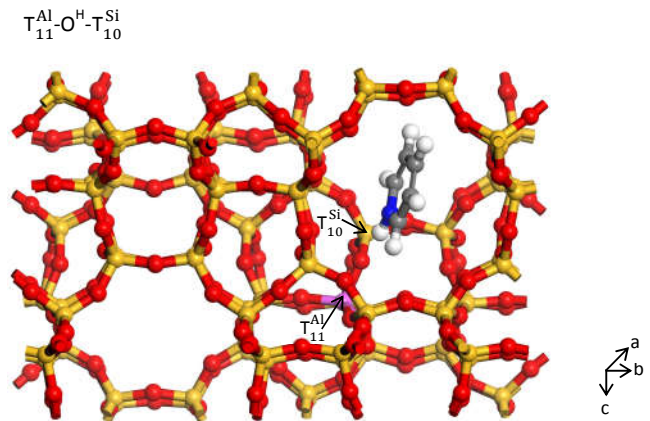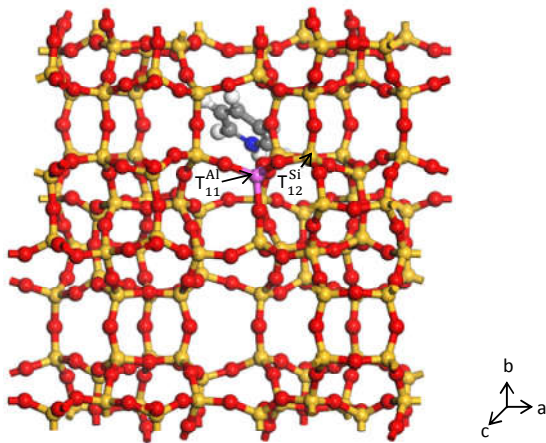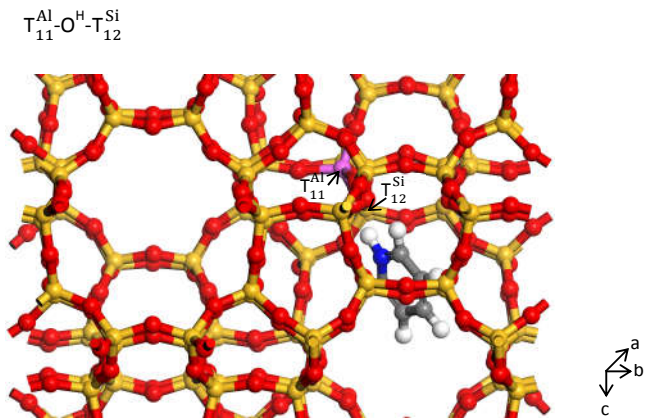



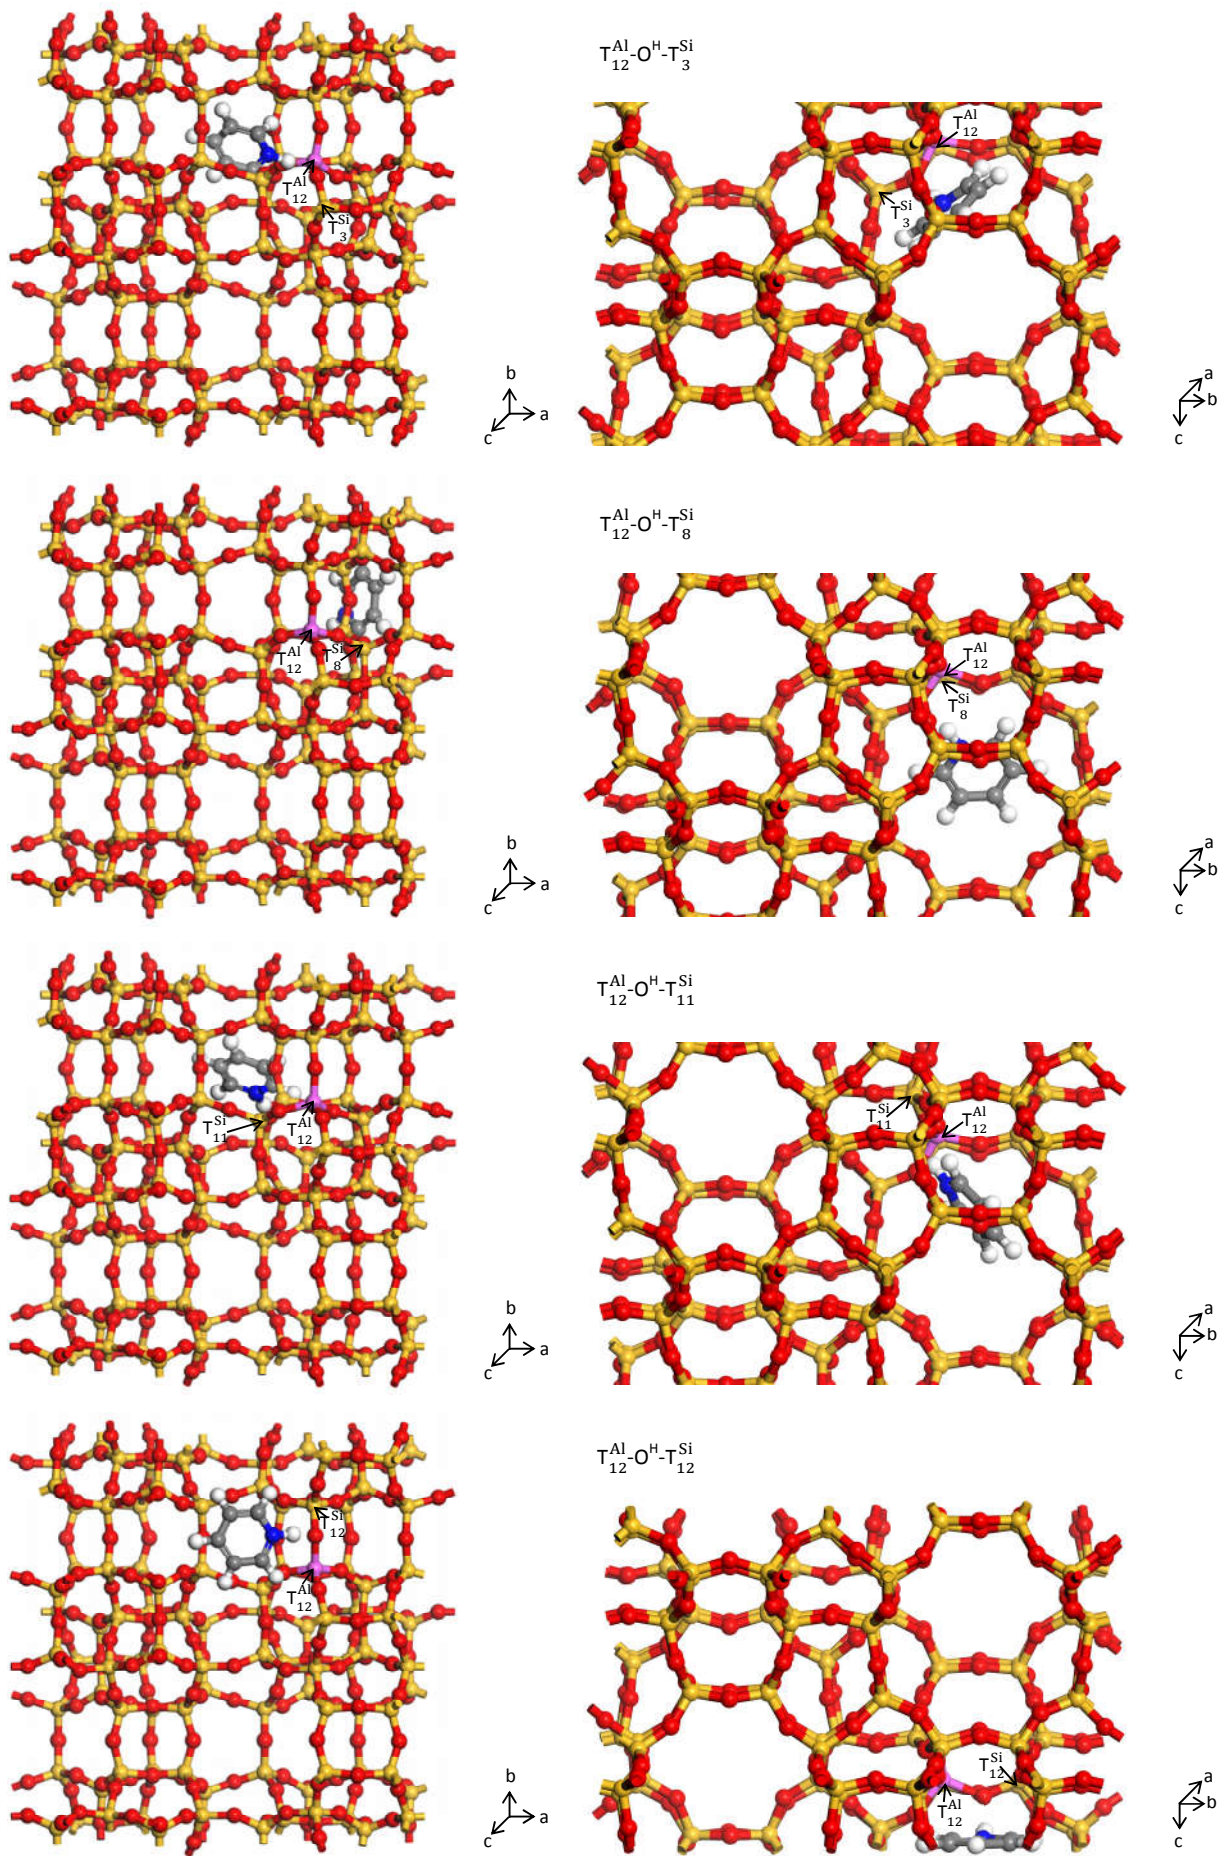

Figure S3 The optimized configurations of pyridine adsorption at all 48 acidic sites of one Al substitution in the framework

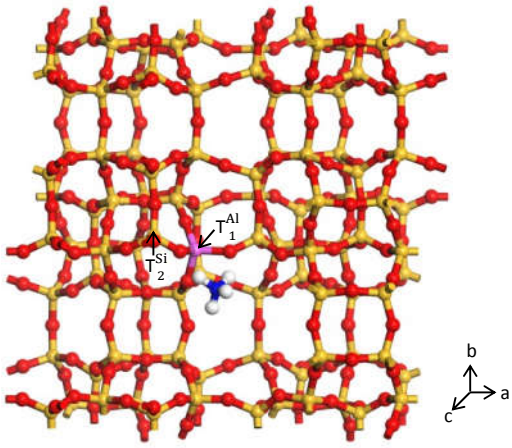

$T_1^{Al}-O^H-T_2^{Si}$

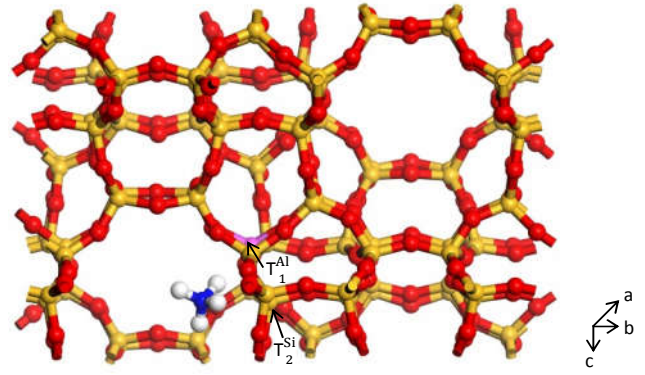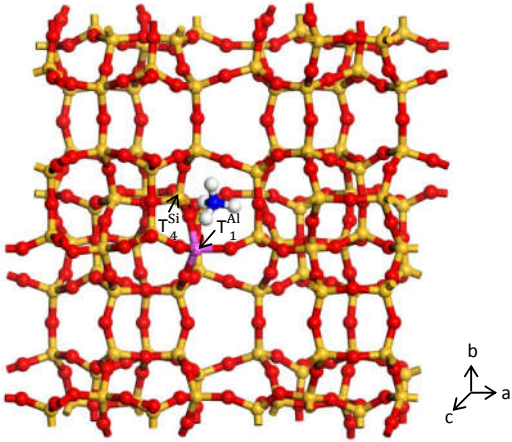

$T_1^{Al}-O^H-T_4^{Si}$

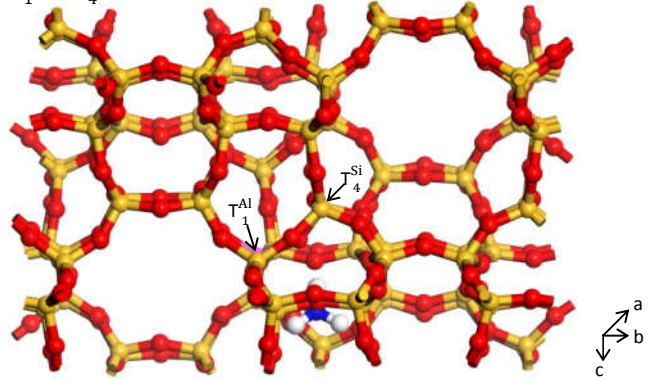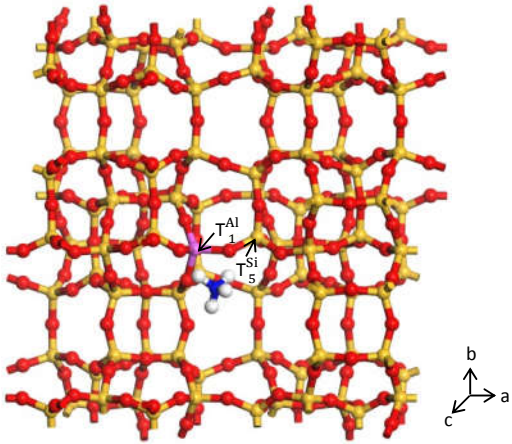

$T_1^{Al}-O^H-T_5^{Si}$

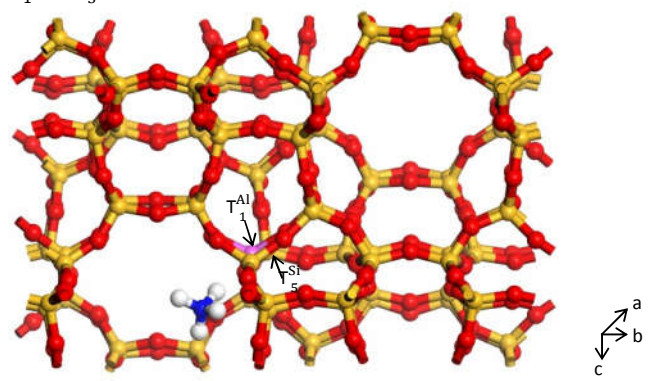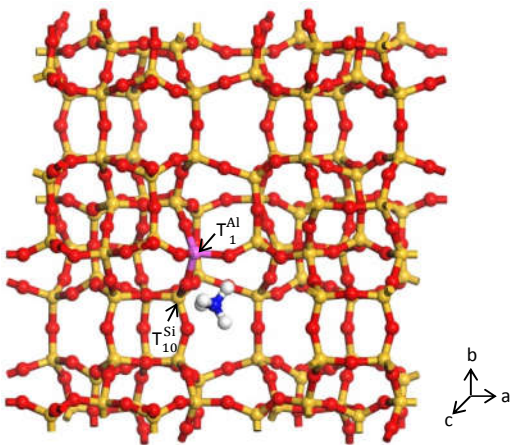

$T_1^{Al}-O^H-T_{10}^{Si}$

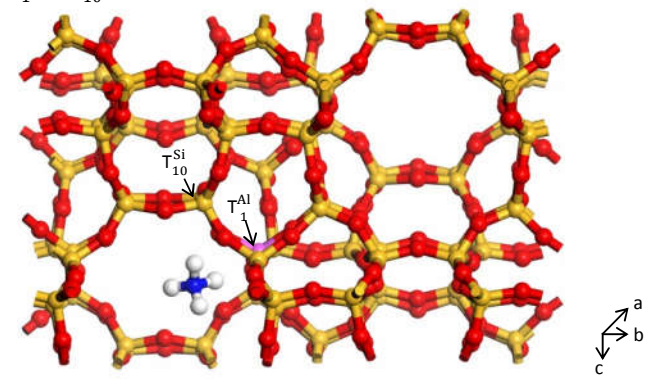

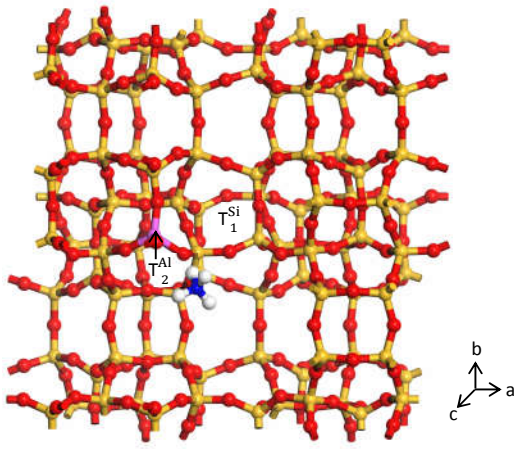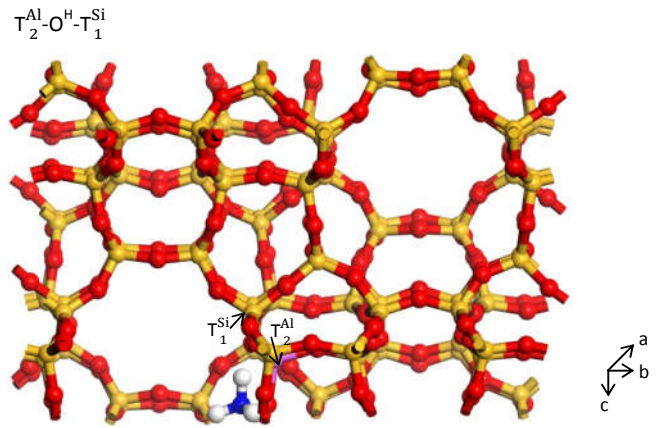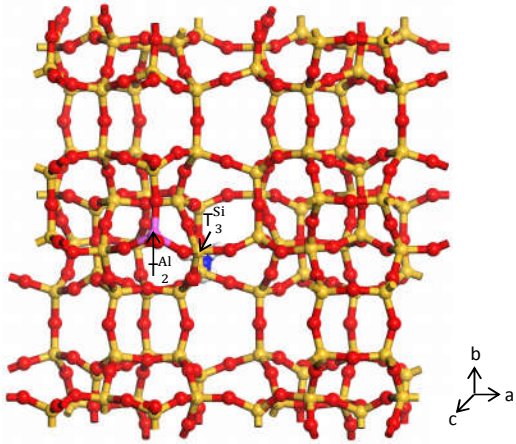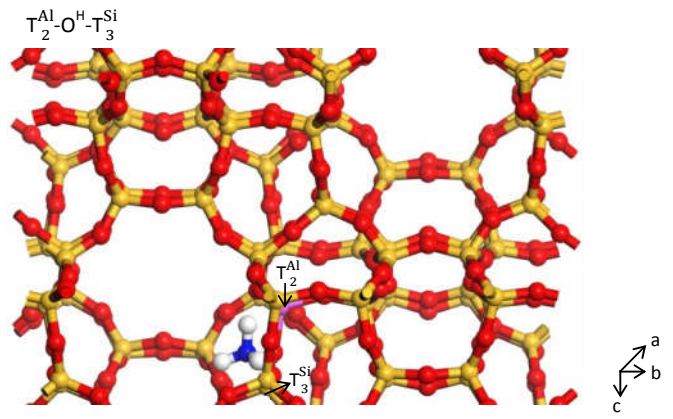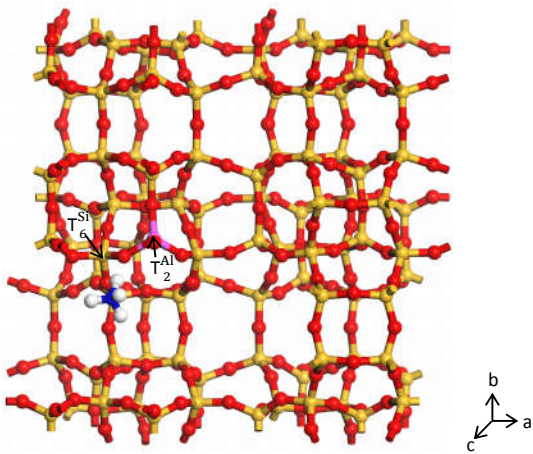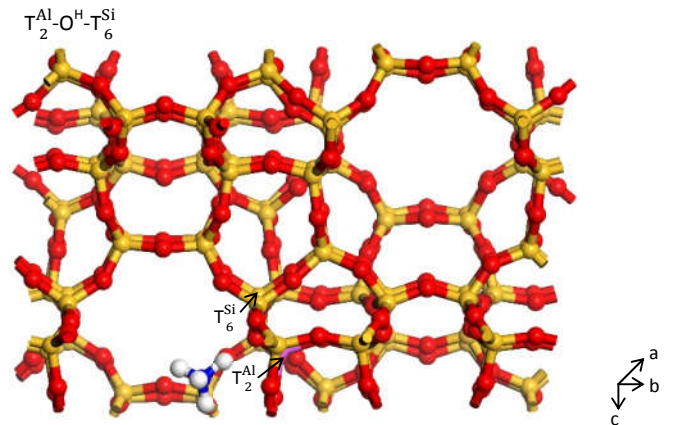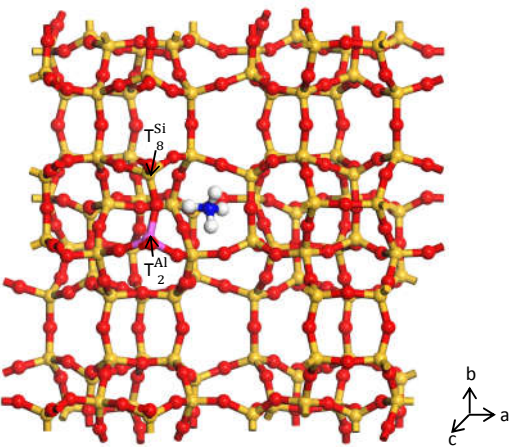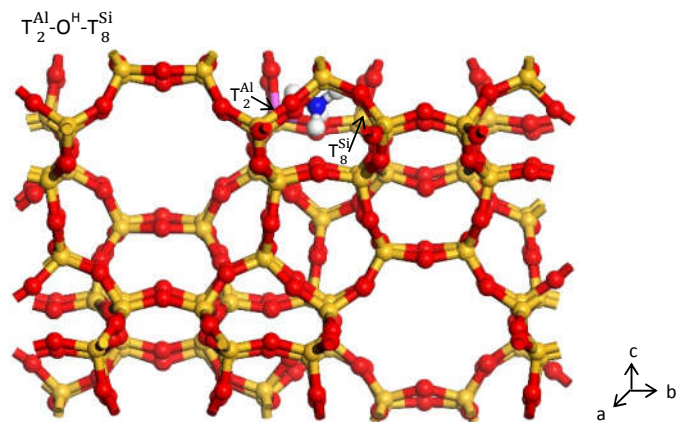

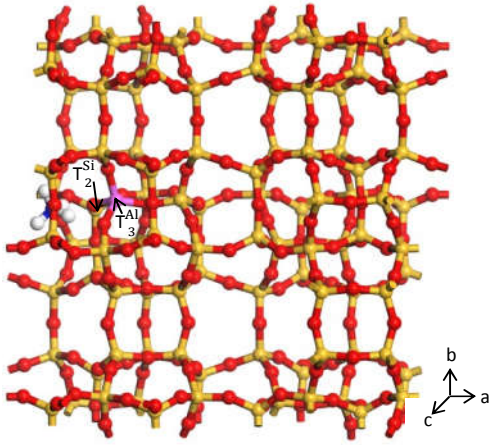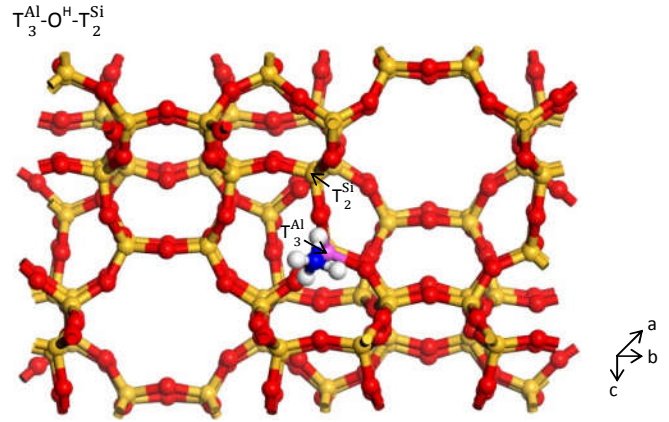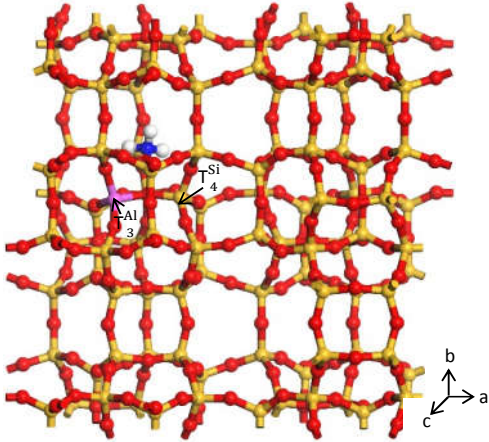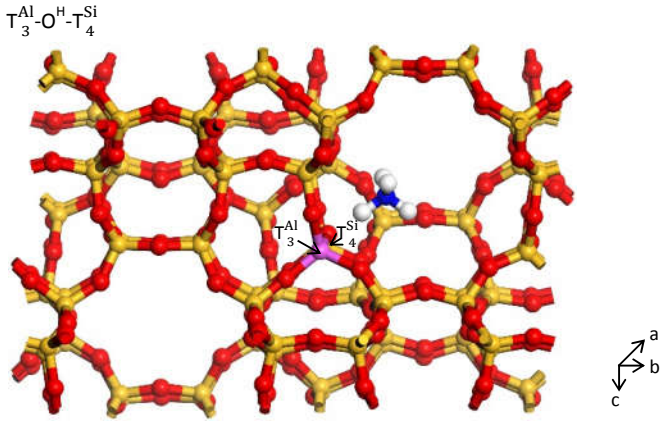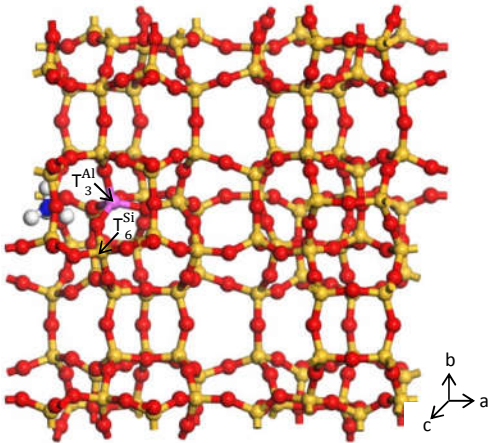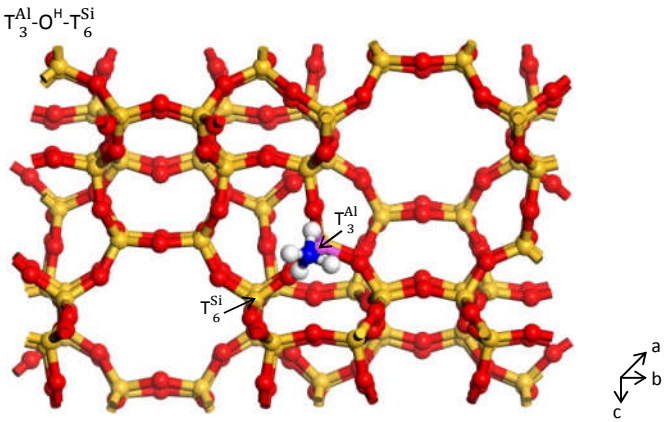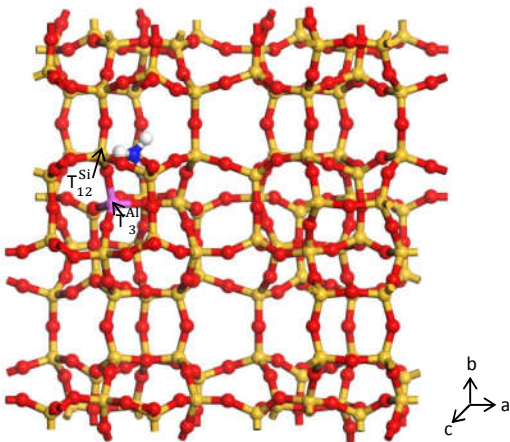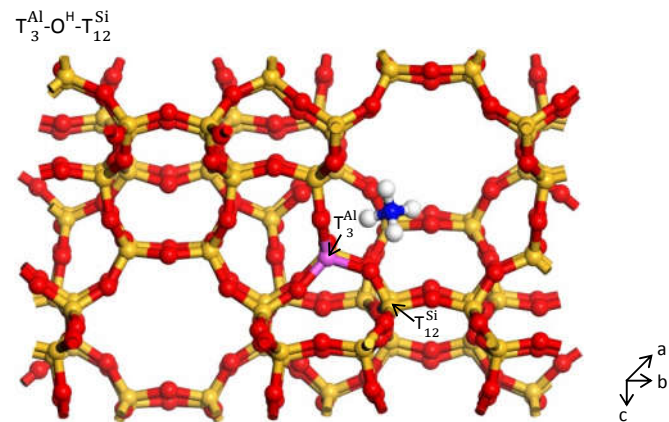

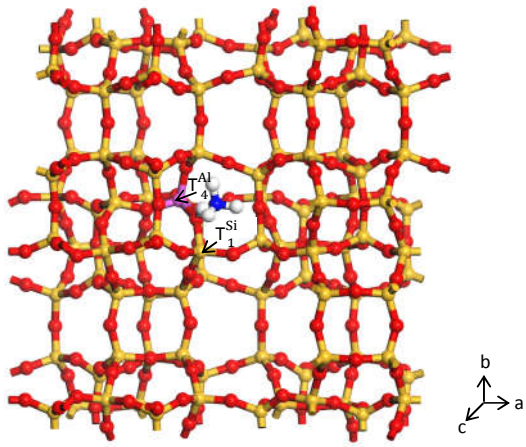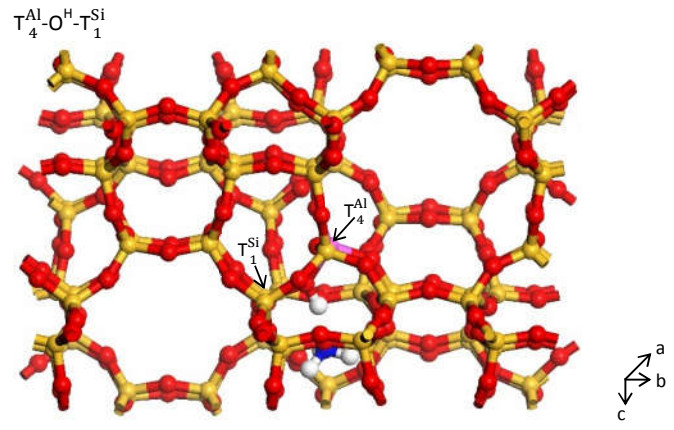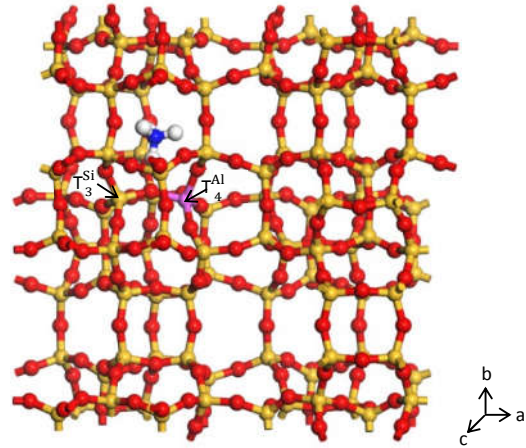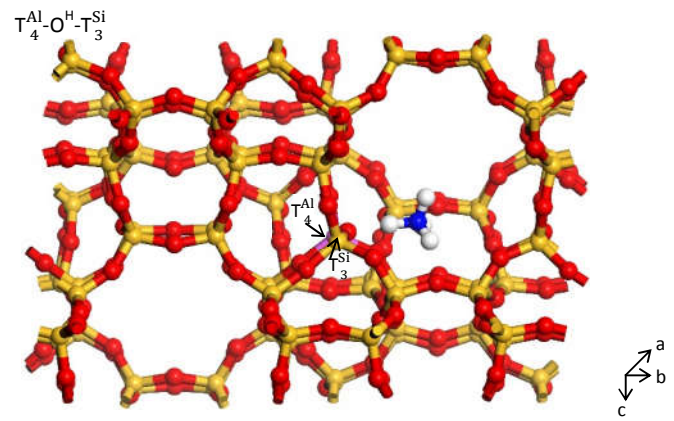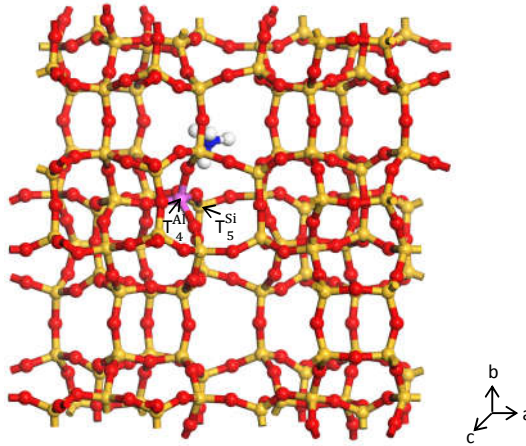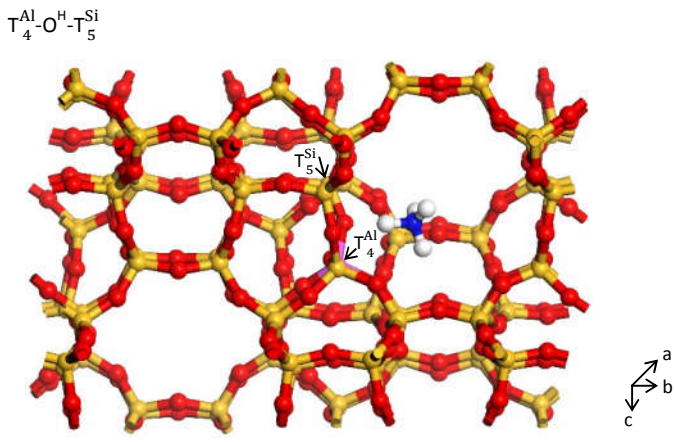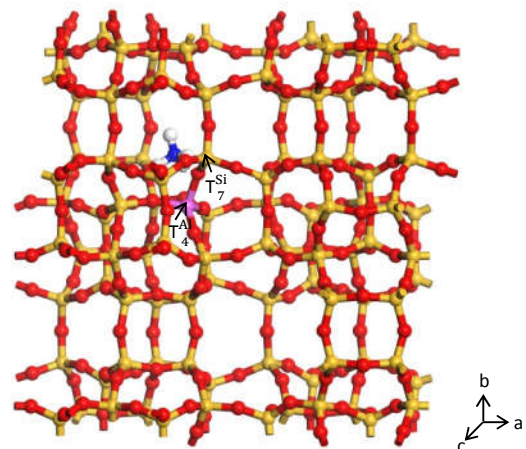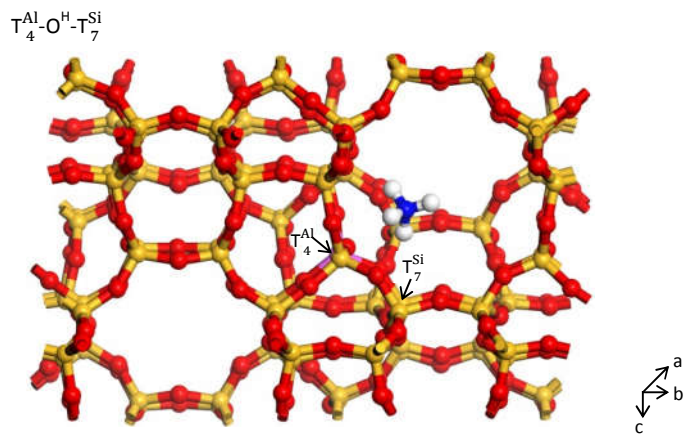

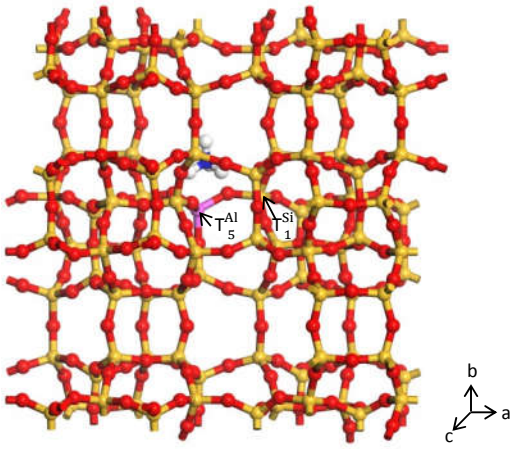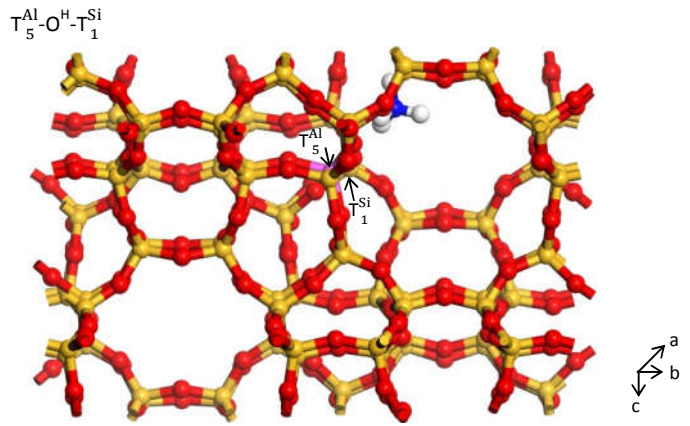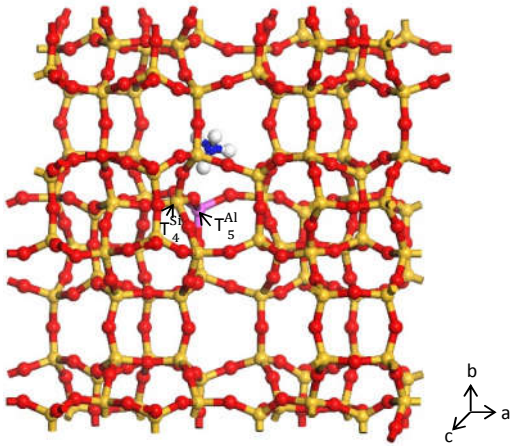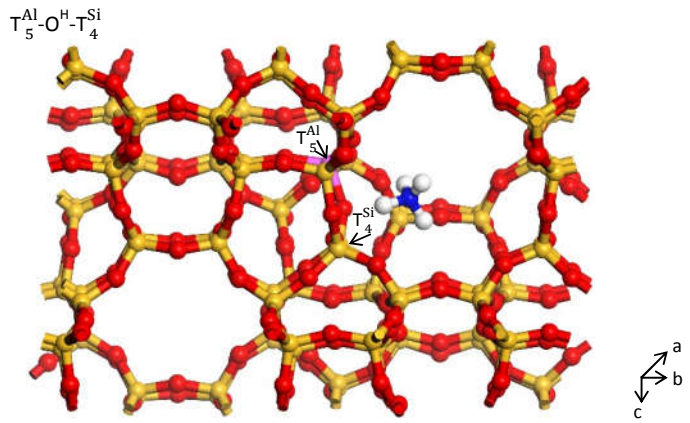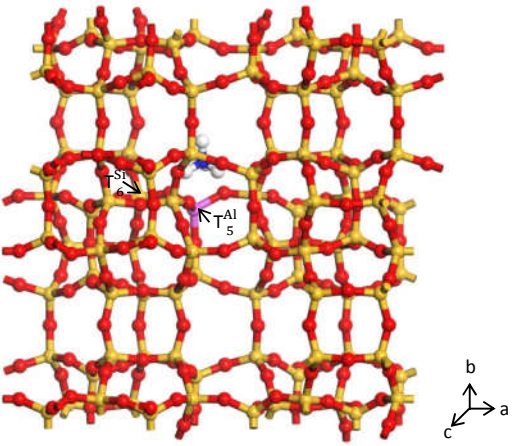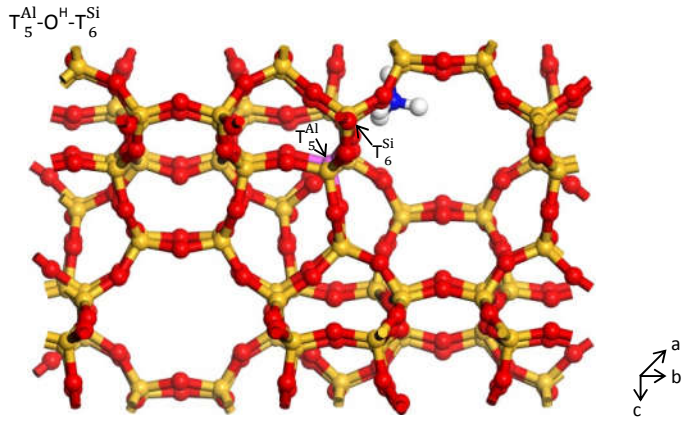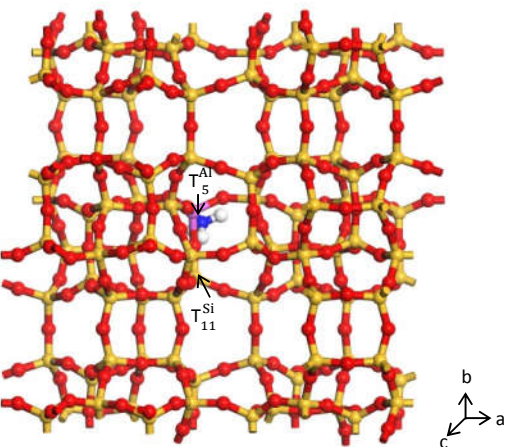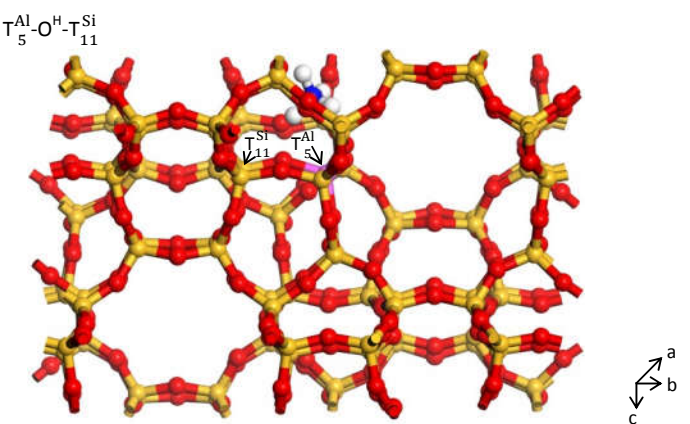

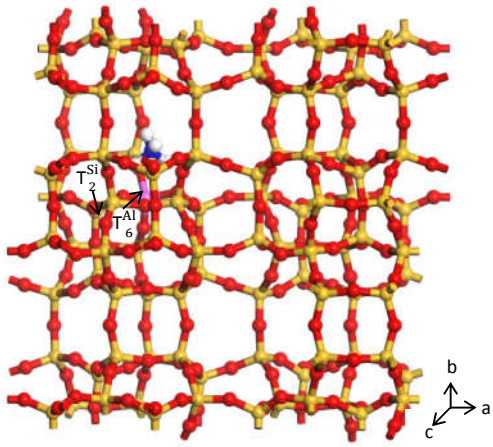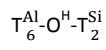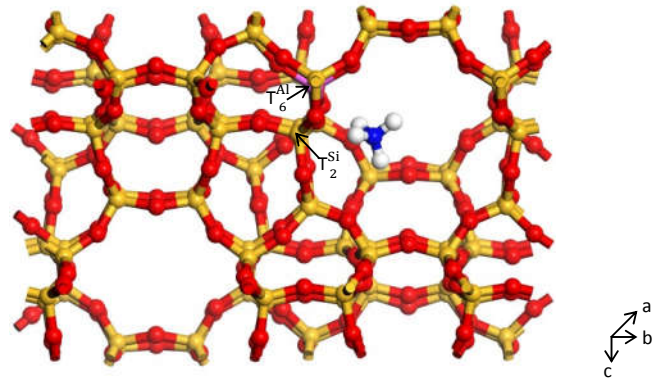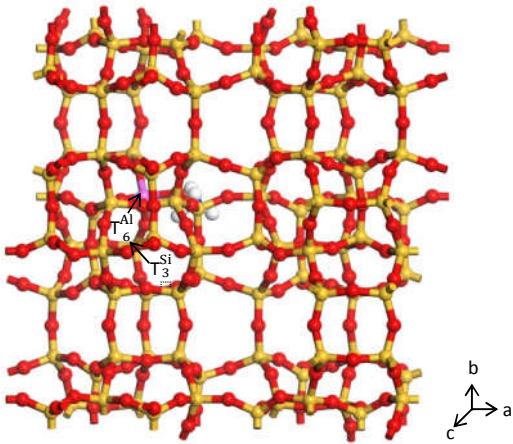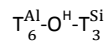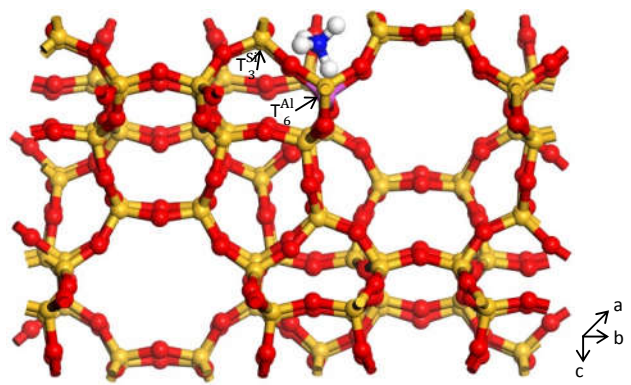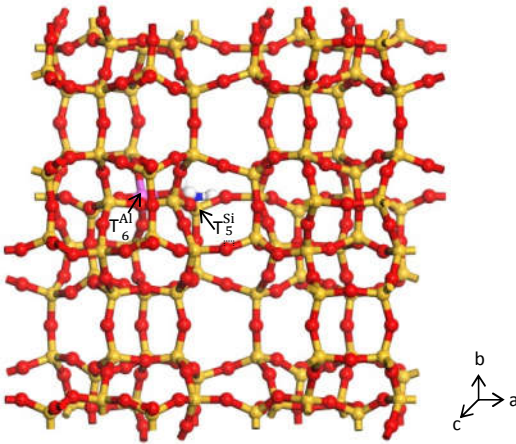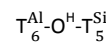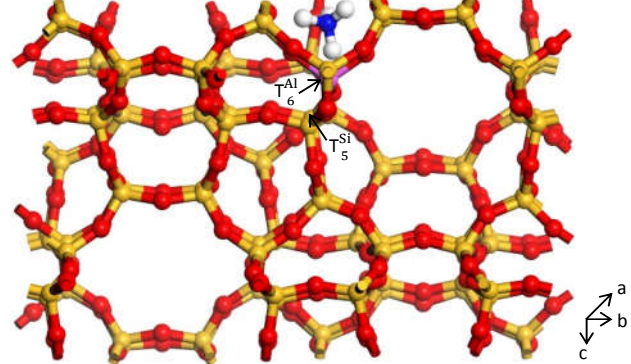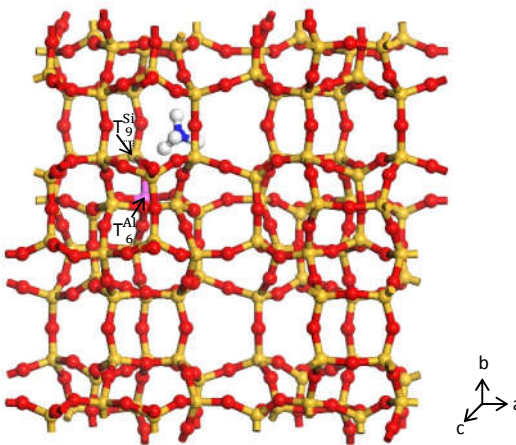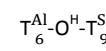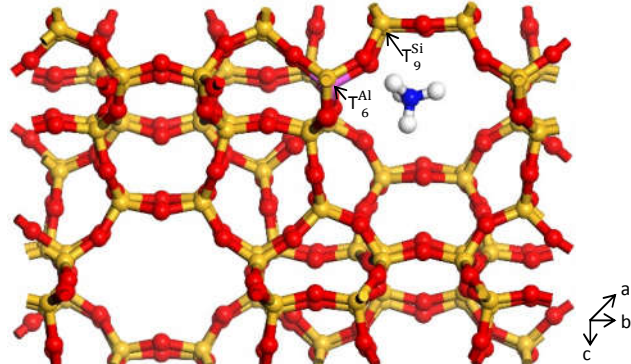

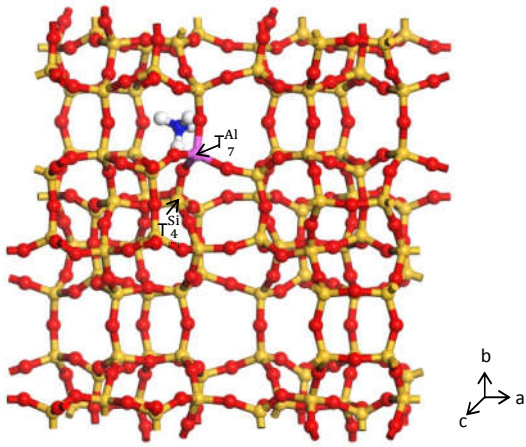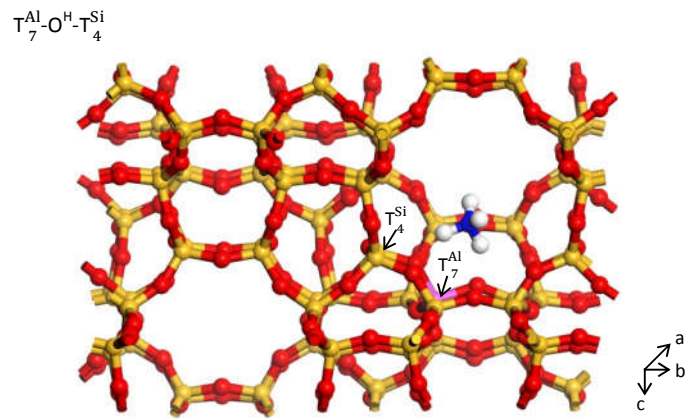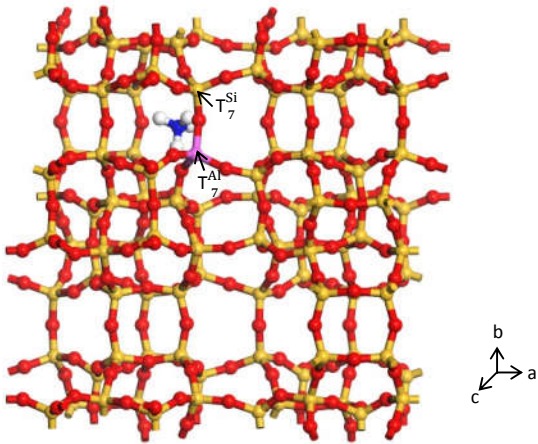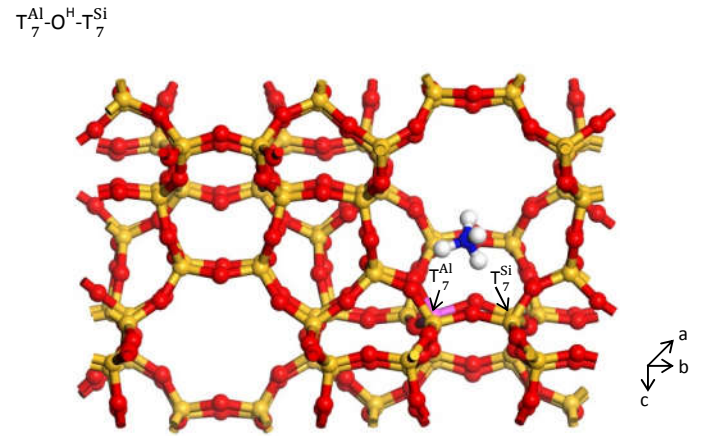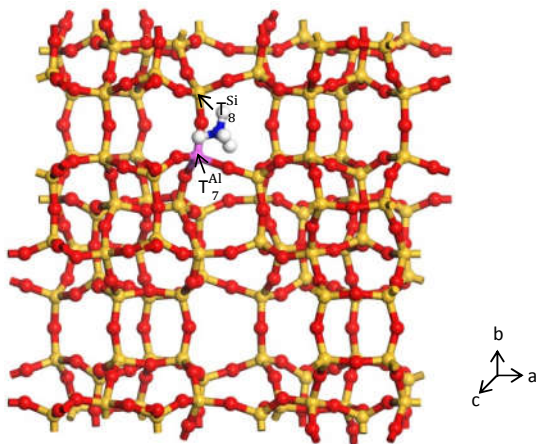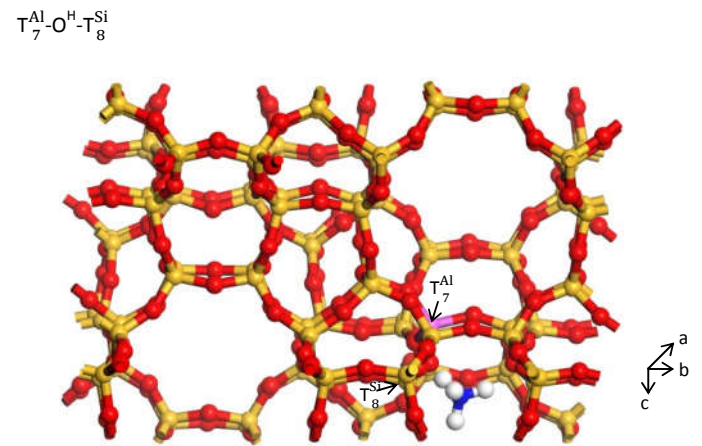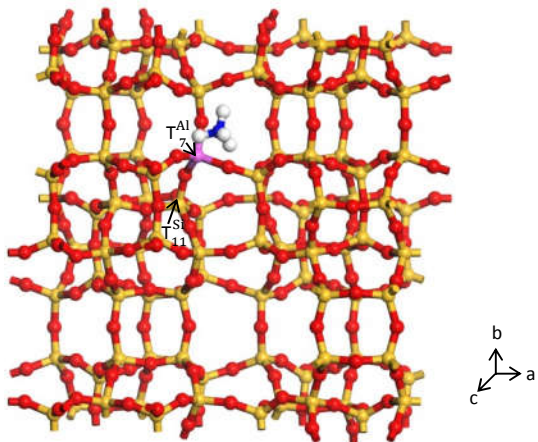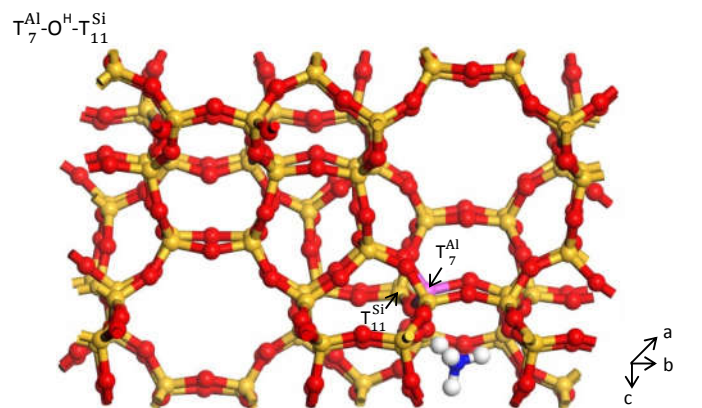



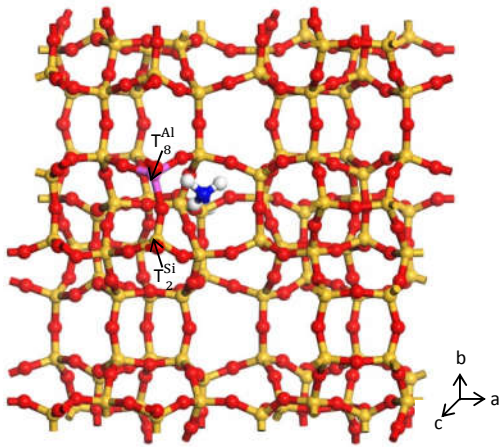

$T_8^{Al}-O^H-T_2^{Si}$

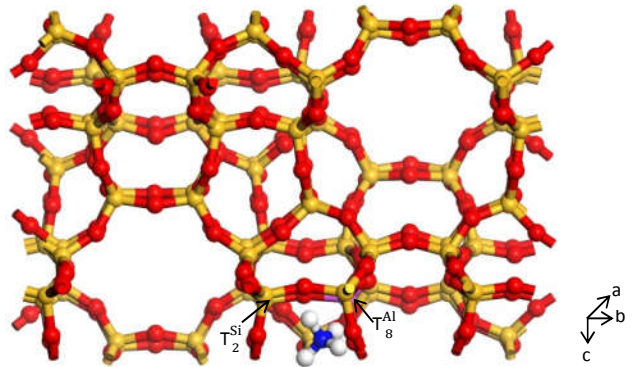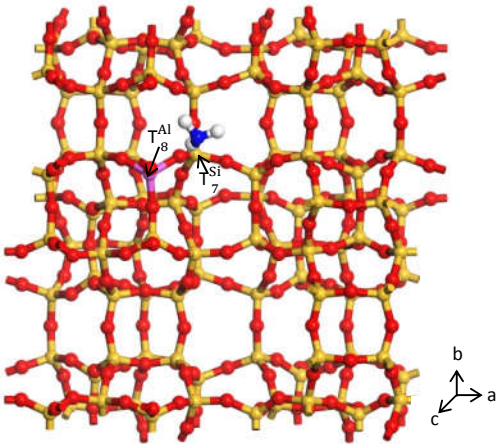

$T_8^{Al}-O^H-T_7^{Si}$

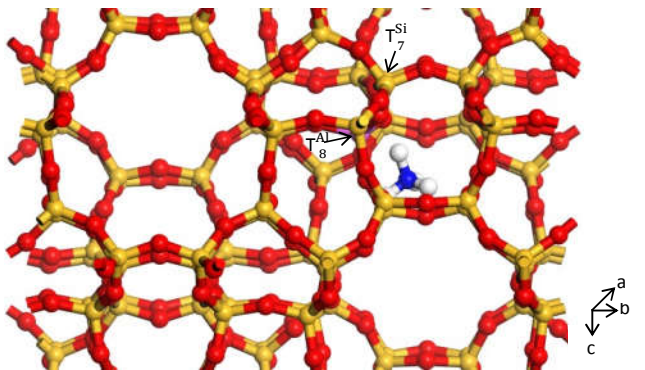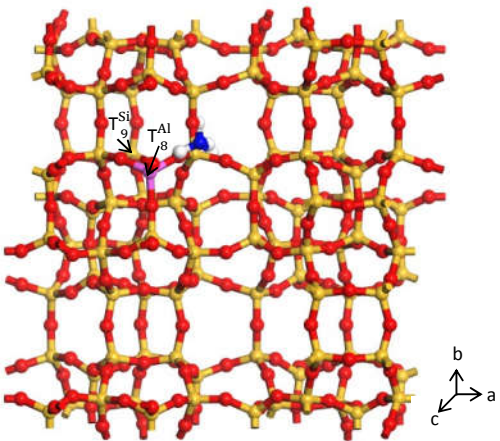

$T_8^{Al}-O^H-T_9^{Si}$

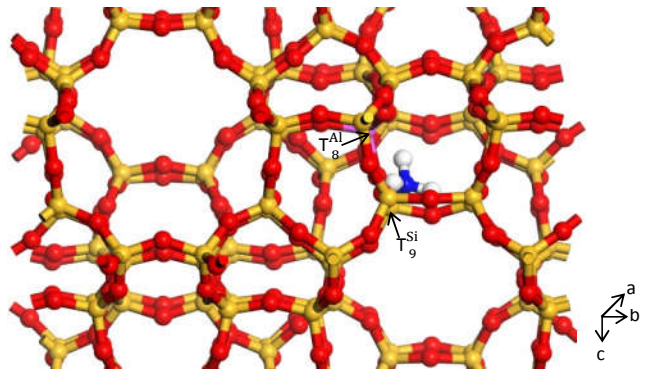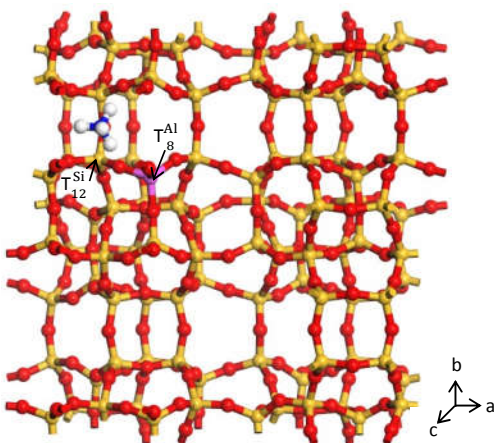

$T_8^{Al}-O^H-T_{12}^{Si}$

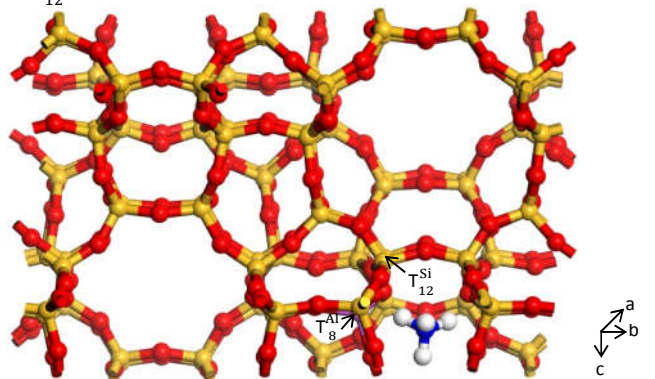

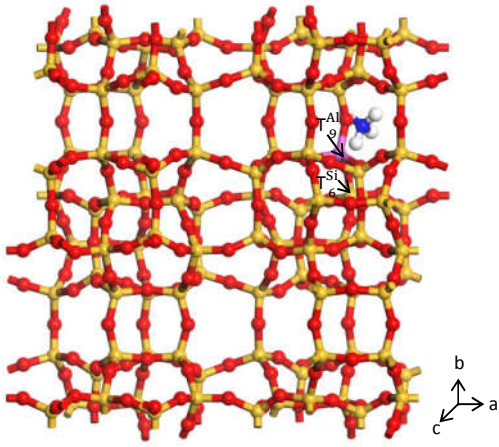

T<sup>Al</sup><sub>9</sub>-O<sup>H</sup>-T<sup>Si</sup><sub>6</sub>

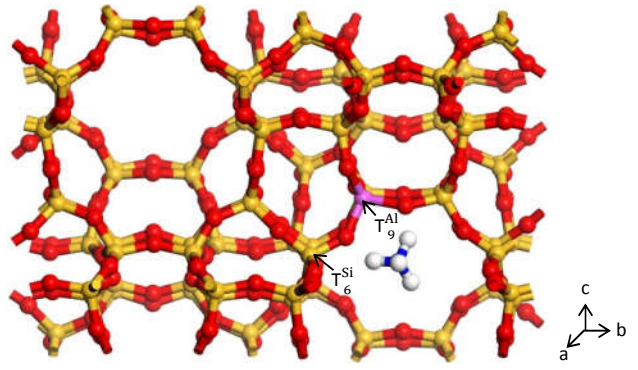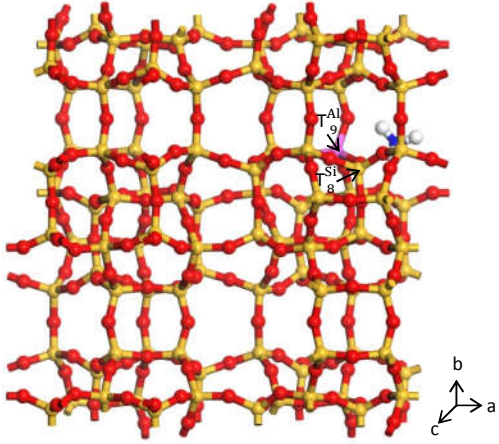

T<sup>Al</sup><sub>9</sub>-O<sup>H</sup>-T<sup>Si</sup><sub>8</sub>

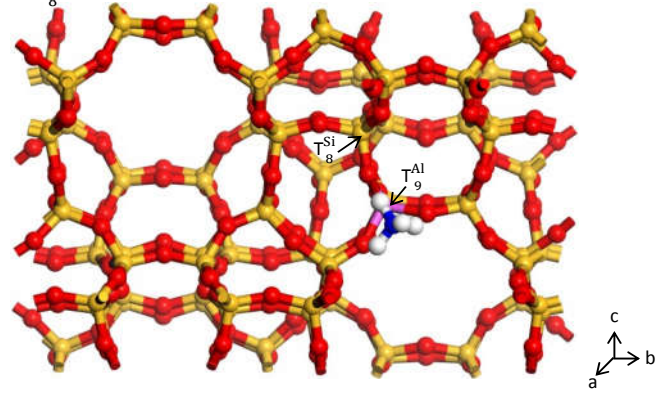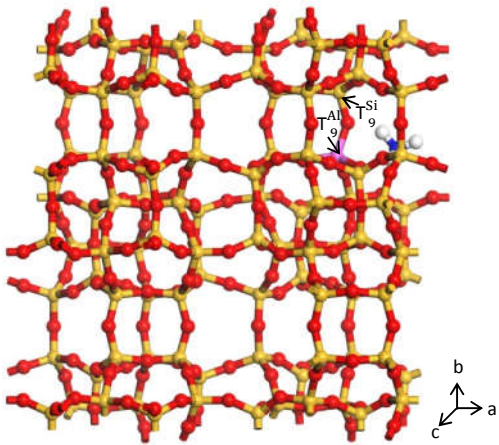

T<sup>Al</sup><sub>9</sub>-O<sup>H</sup>-T<sup>Si</sup><sub>9</sub>

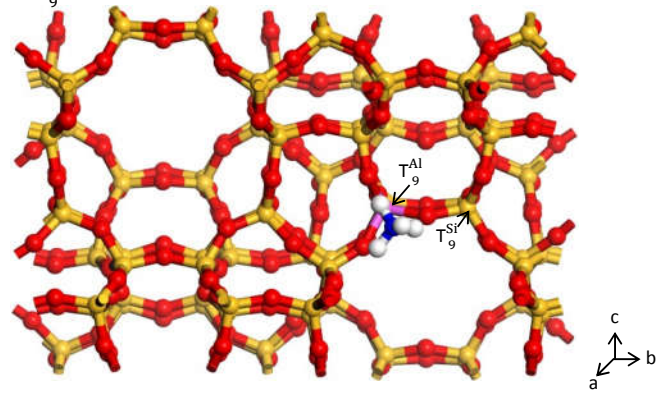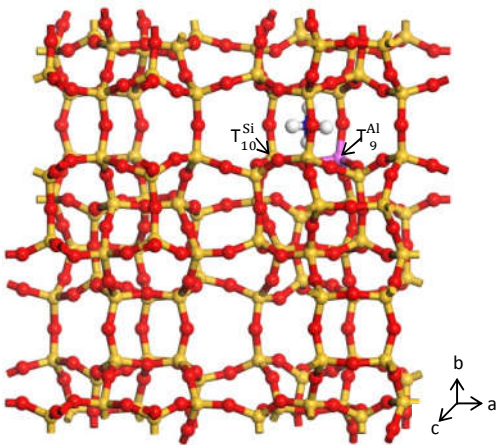

T<sup>Al</sup><sub>9</sub>-O<sup>H</sup>-T<sup>Si</sup><sub>10</sub>

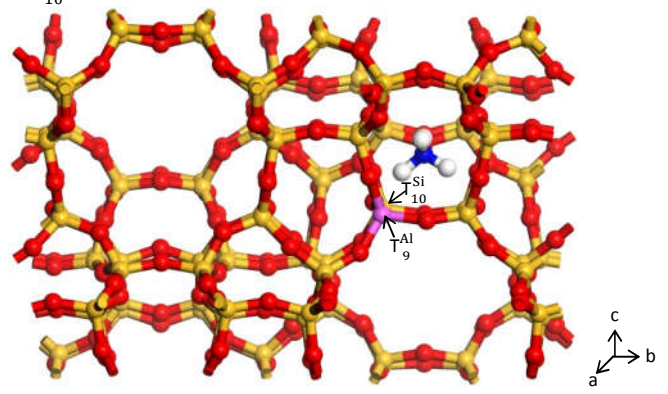

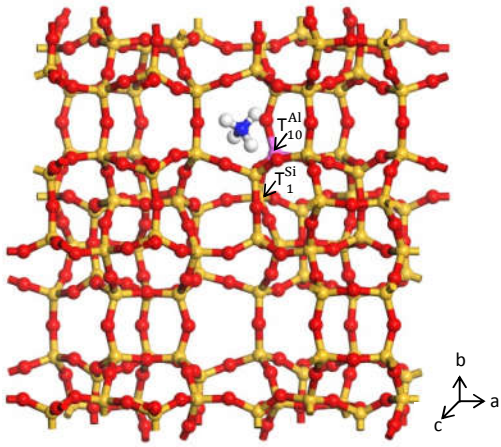

$T_{10}^{Al}-O^H-T_1^{Si}$

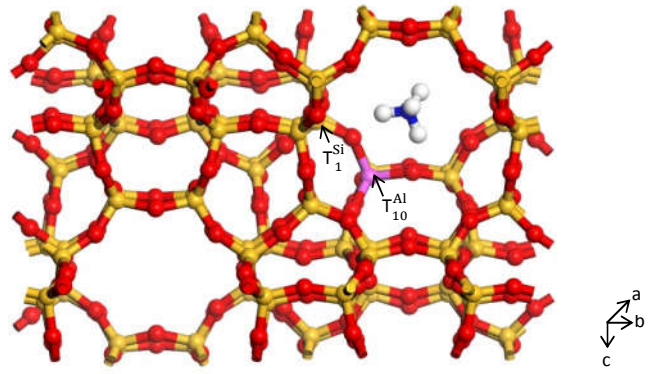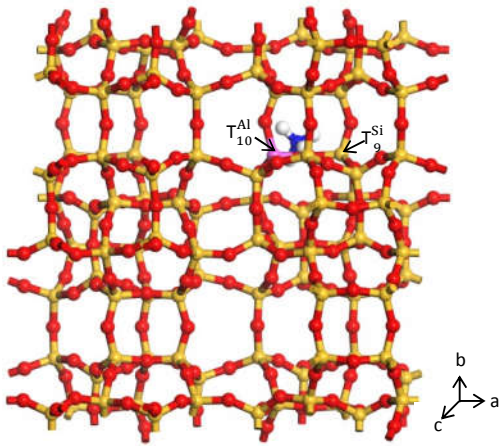

$T_{10}^{Al}-O^H-T_9^{Si}$

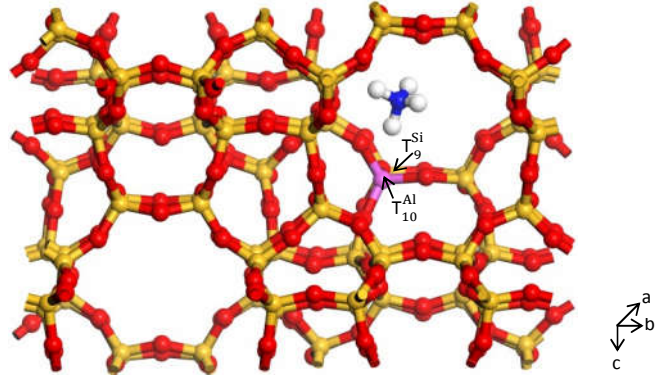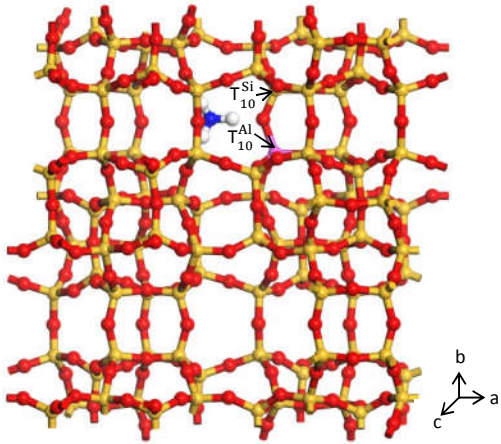

$T_{10}^{Al}-O^H-T_{10}^{Si}$

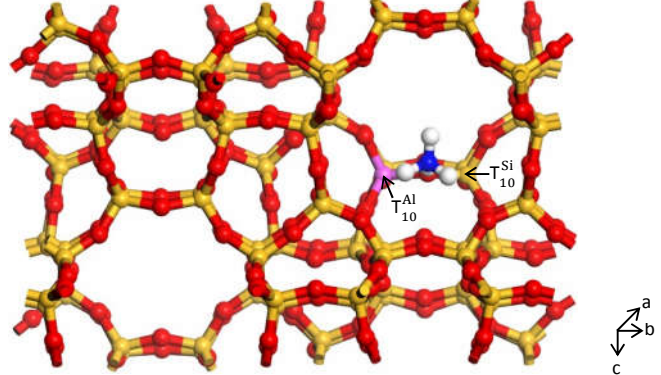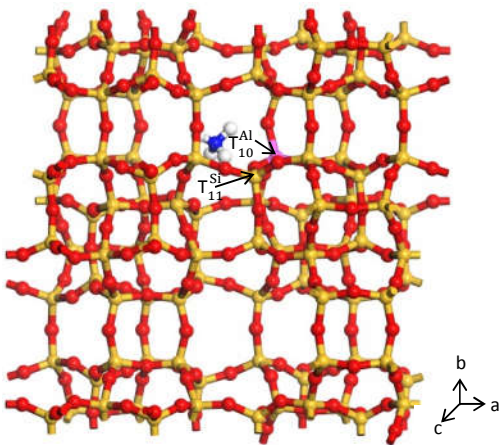

$T_{10}^{Al}-O^H-T_{11}^{Si}$

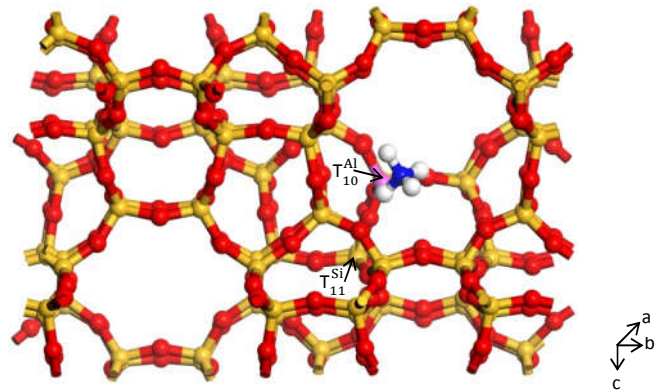

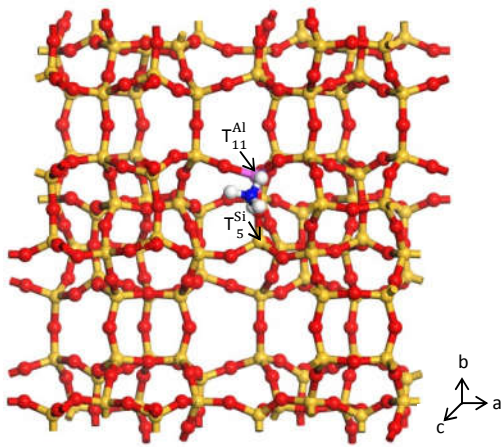

T<sub>11</sub><sup>Al</sup>-O<sup>H</sup>-T<sub>5</sub><sup>Si</sup>

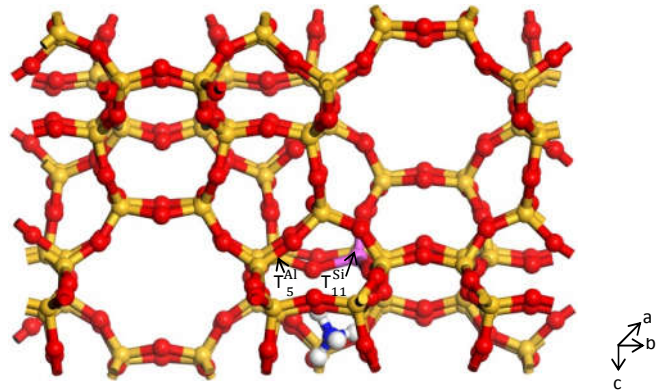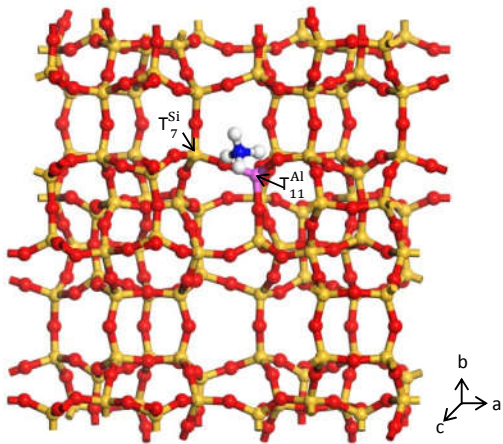

T<sub>11</sub><sup>Al</sup>-O<sup>H</sup>-T<sub>7</sub><sup>Si</sup>

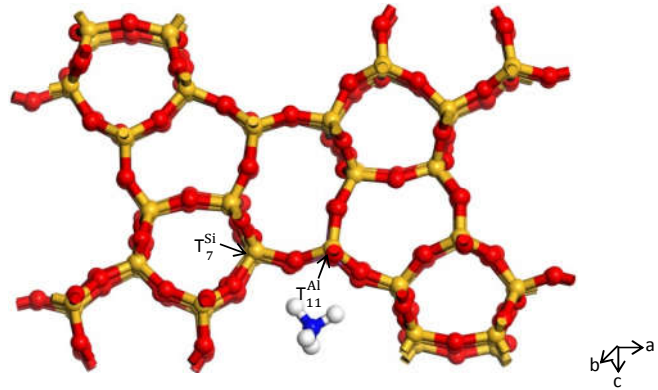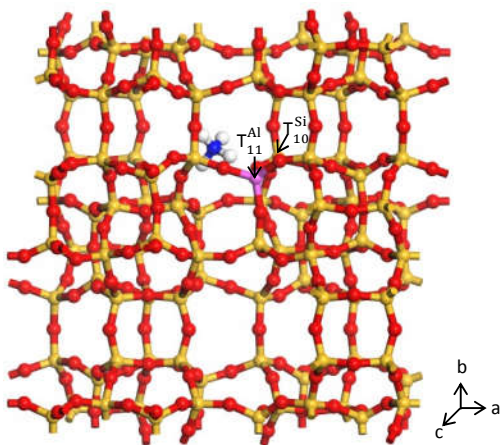

T<sub>11</sub><sup>Al</sup>-O<sup>H</sup>-T<sub>10</sub><sup>Si</sup>

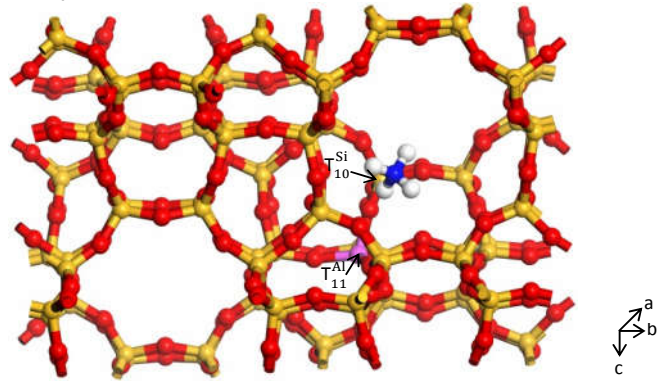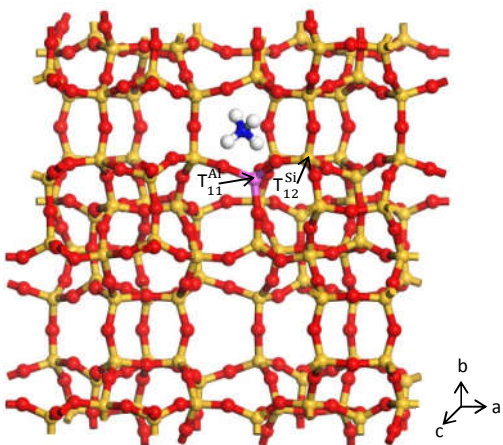

T<sub>11</sub><sup>Al</sup>-O<sup>H</sup>-T<sub>12</sub><sup>Si</sup>

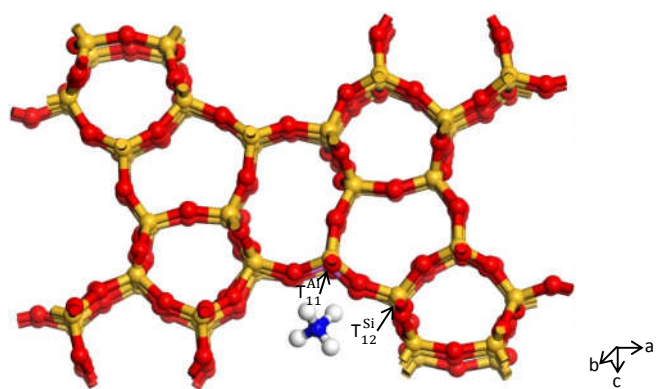

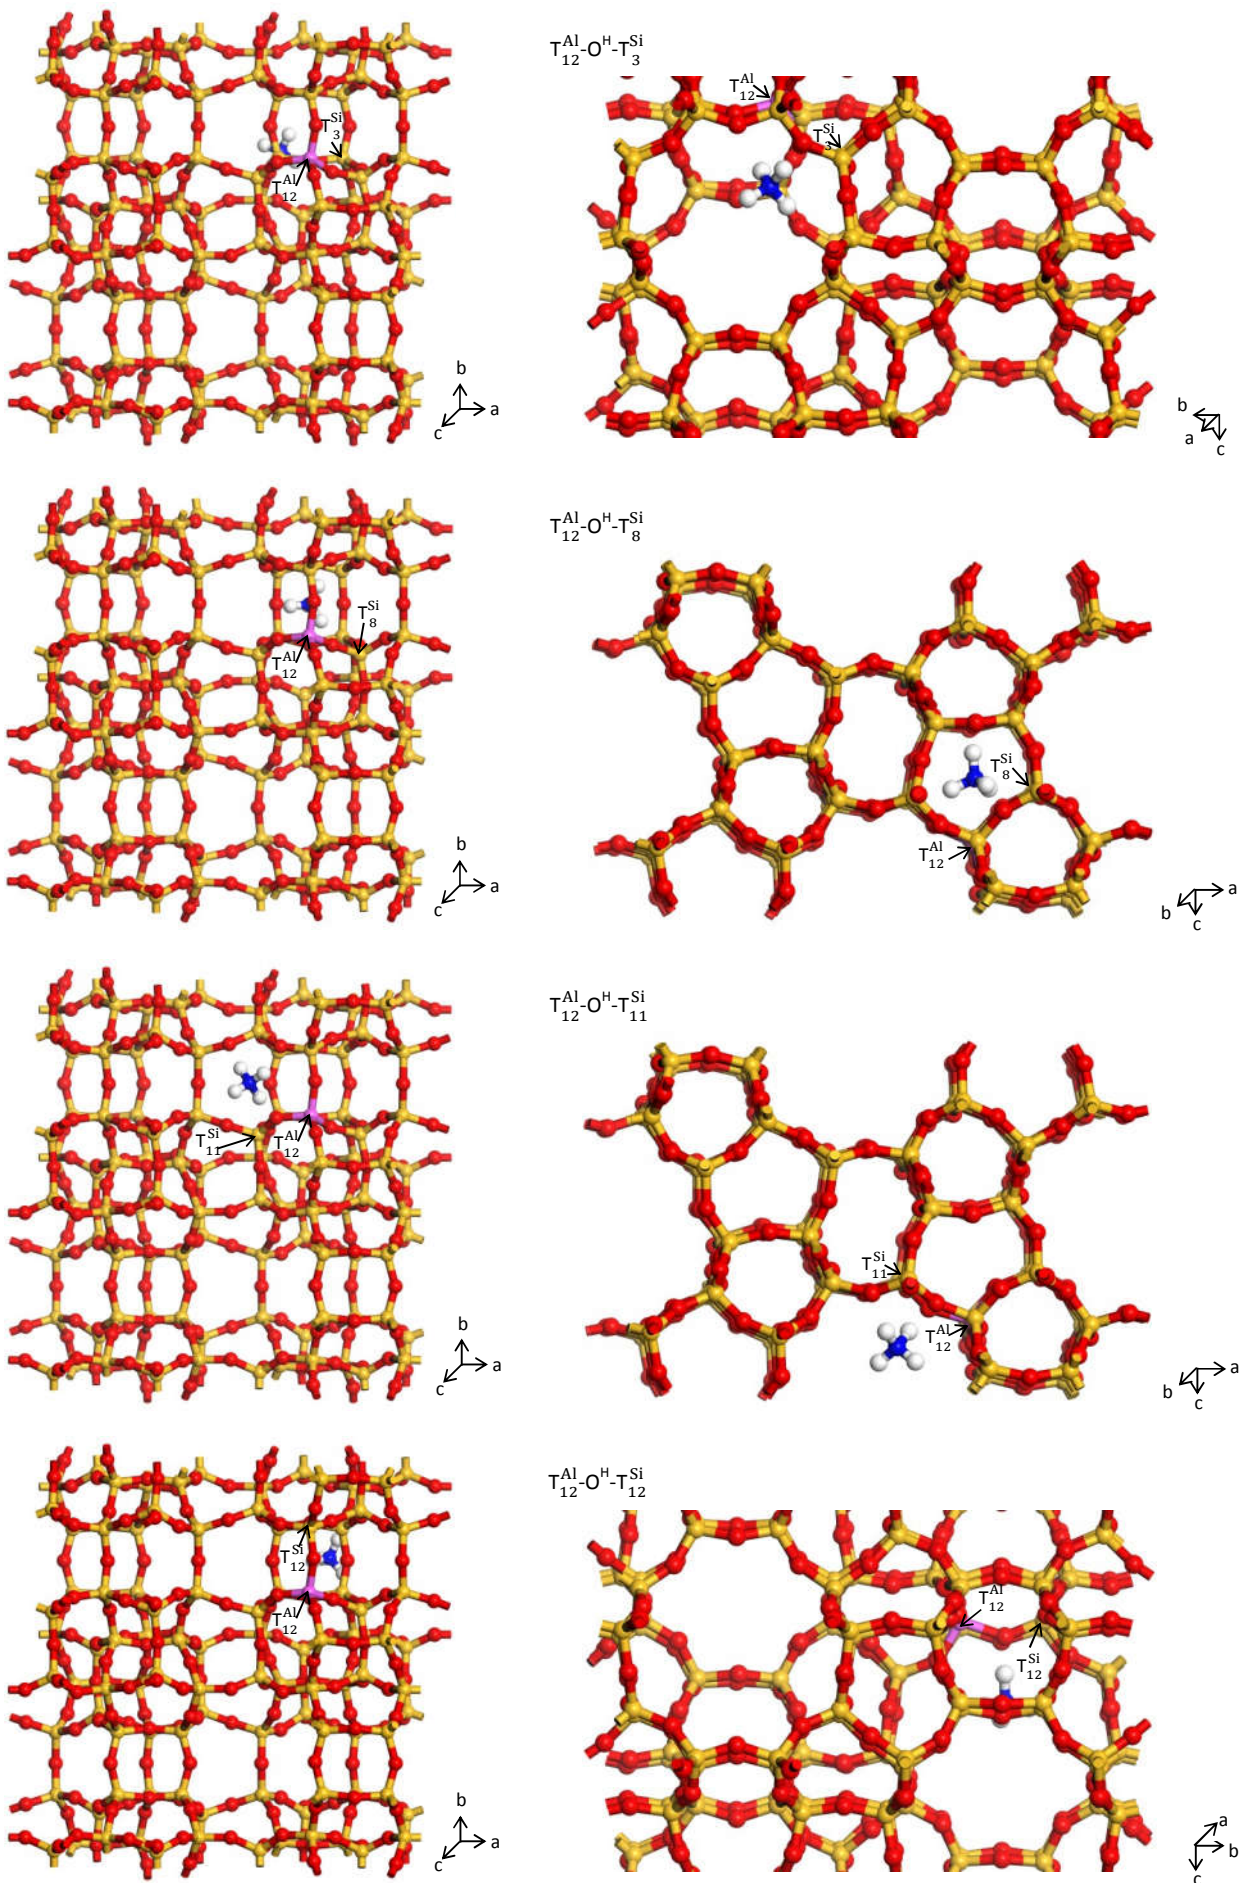

Figure S4 The optimized configurations of ammonia adsorption at all 48 acidic sites of one Al substitution in the framework

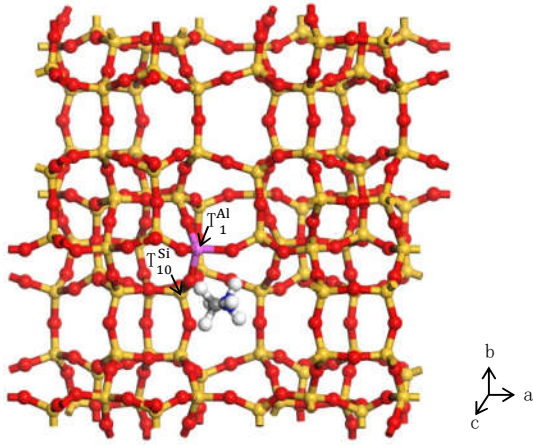

$T_1^{Al}-O^H-T_{10}^{Si}$

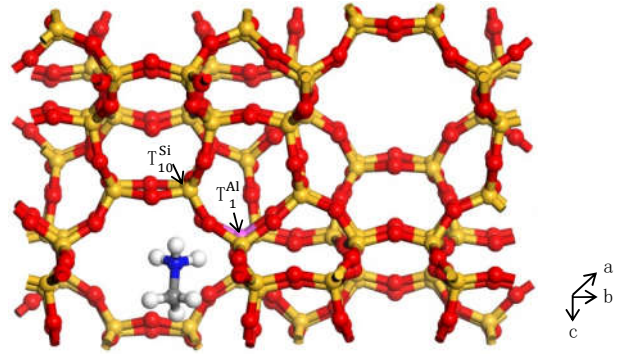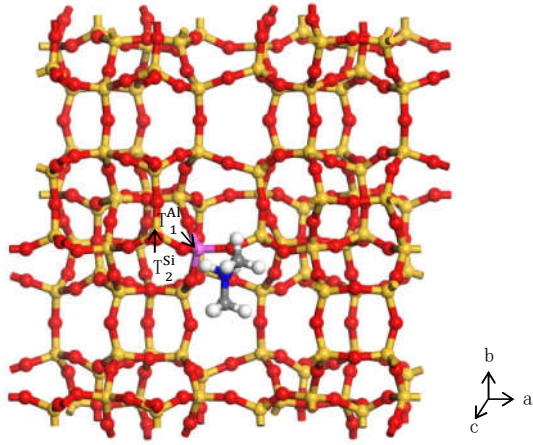

$T_1^{Al}-O^H-T_2^{Si}$

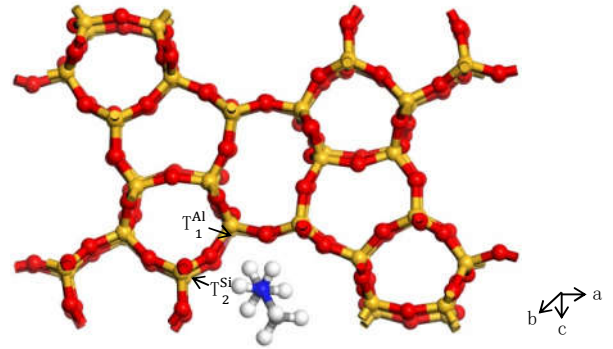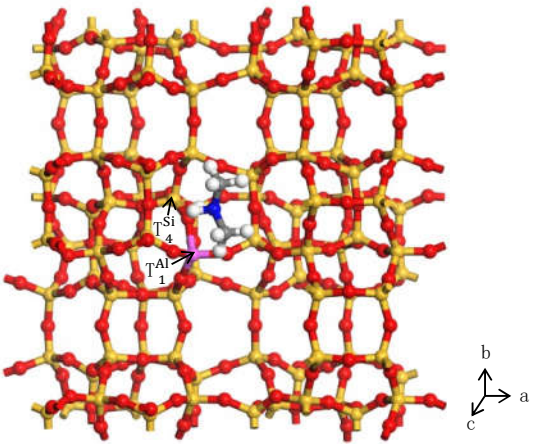

$T_1^{Al}-O^H-T_4^{Si}$

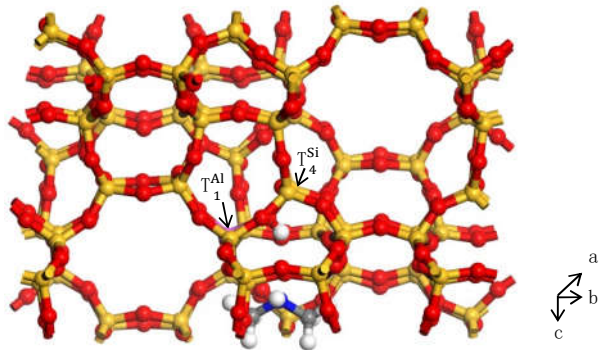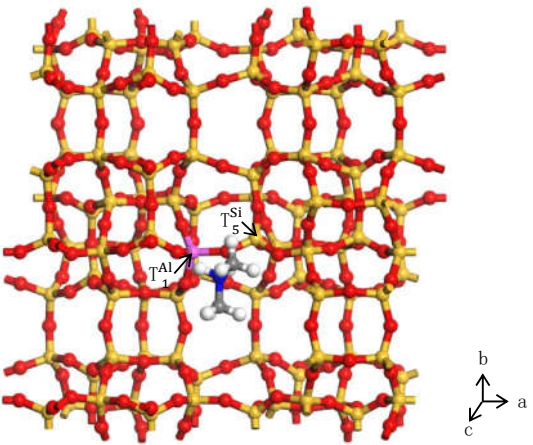

$T_1^{Al}-O^H-T_5^{Si}$

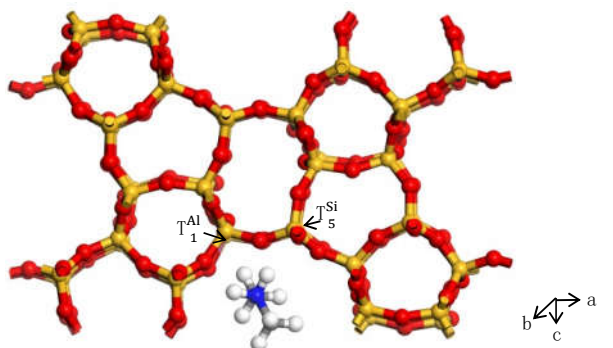

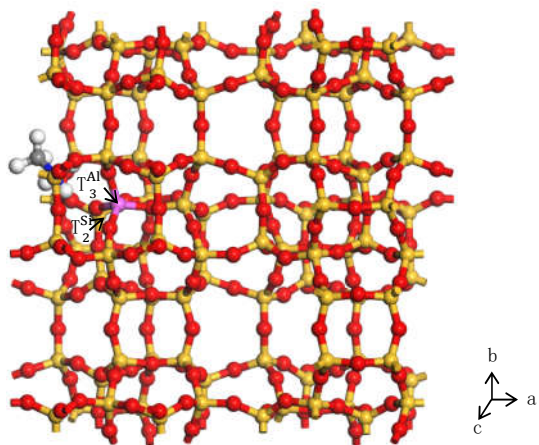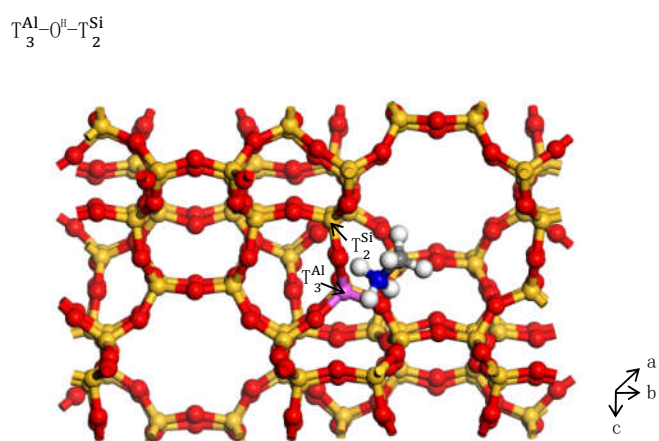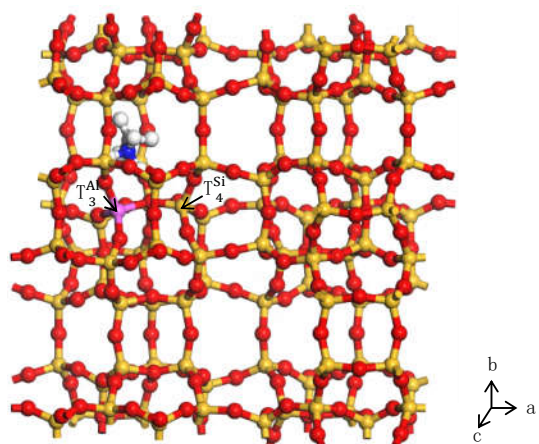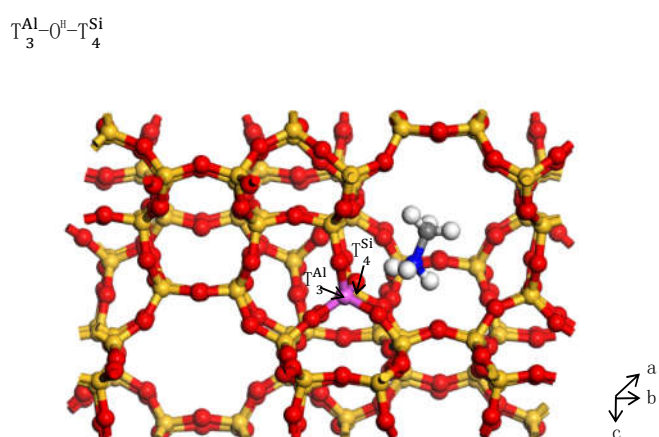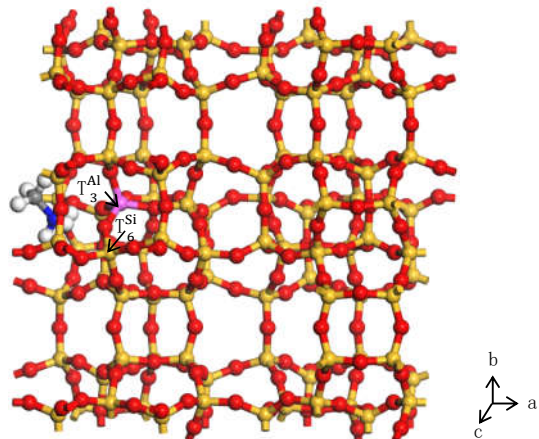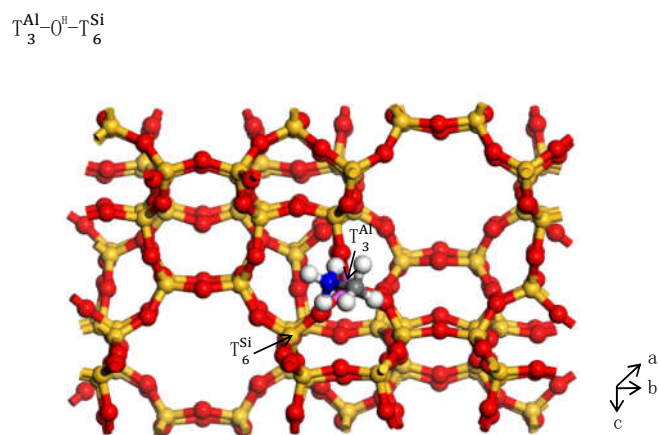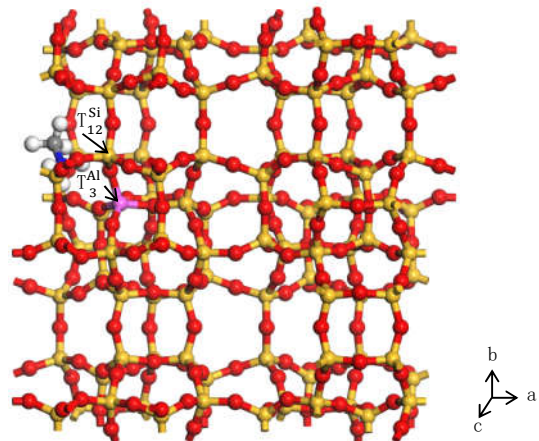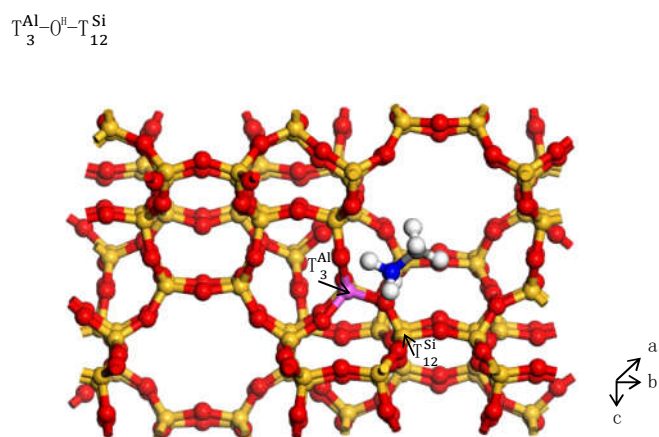

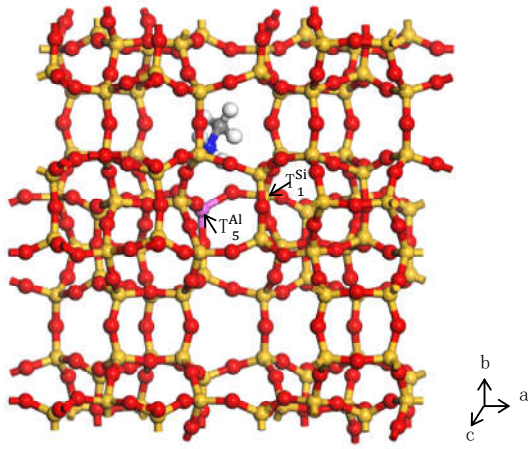

$T_5^{\text{Al}}-O^{\text{II}}-T_1^{\text{Si}}$

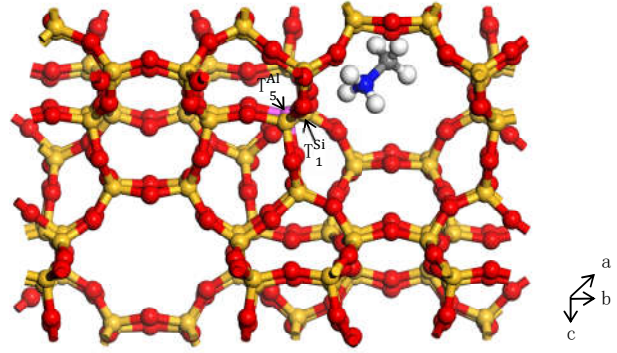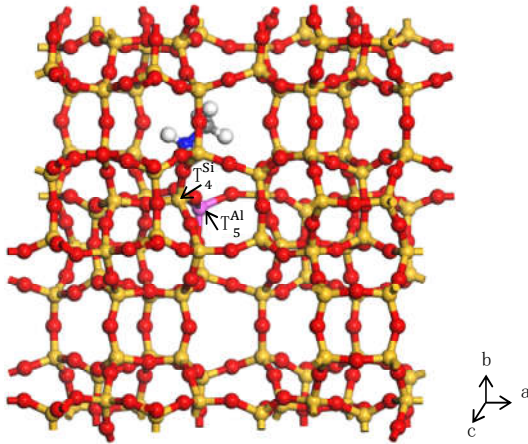

$T_5^{\text{Al}}-O^{\text{II}}-T_4^{\text{Si}}$

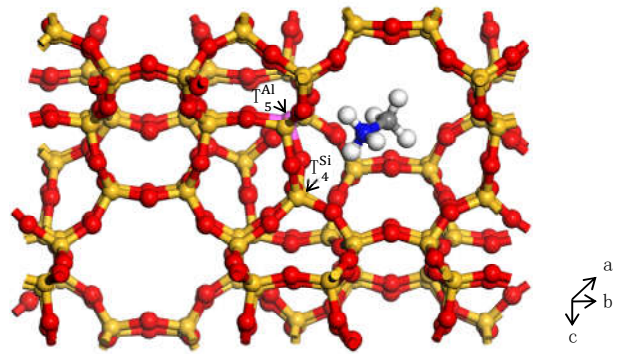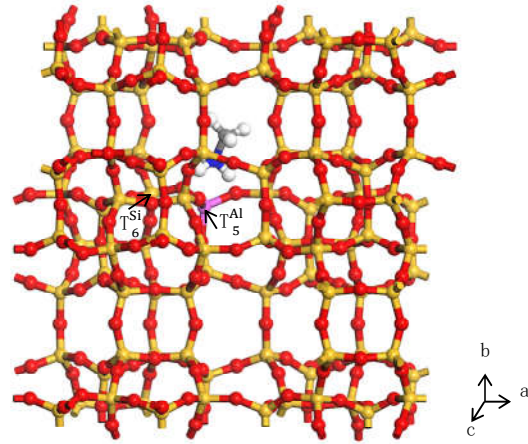

$T_5^{\text{Al}}-O^{\text{II}}-T_6^{\text{Si}}$

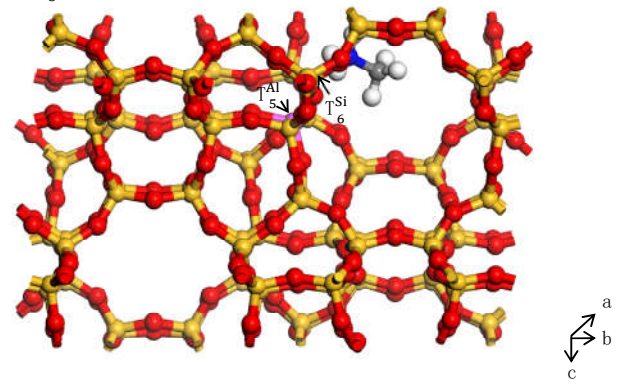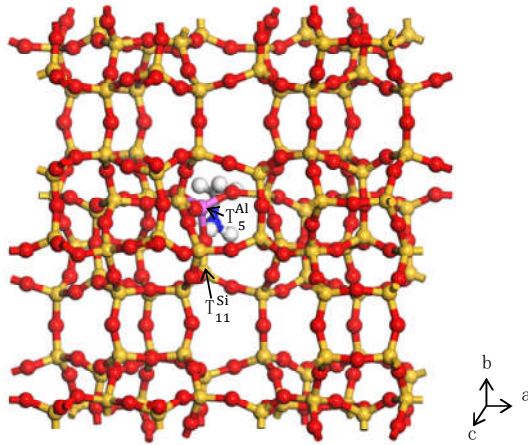

$T_5^{\text{Al}}-O^{\text{II}}-T_{11}^{\text{Si}}$

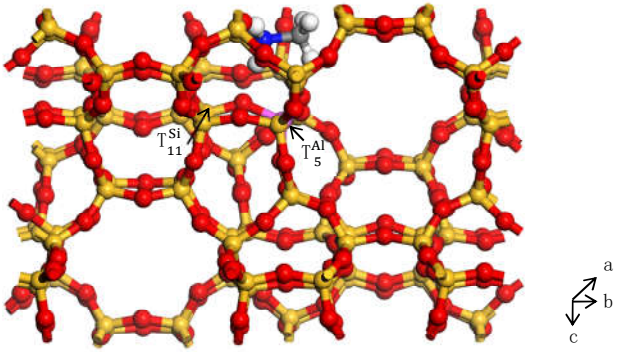



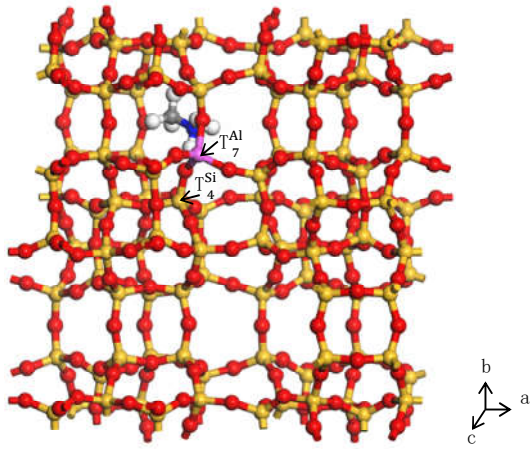

$T_7^{Al}-O^H-T_4^{Si}$

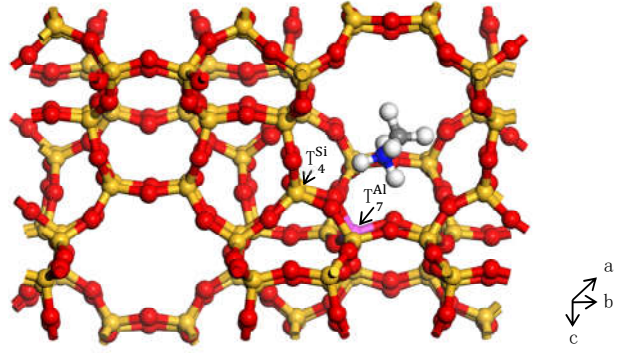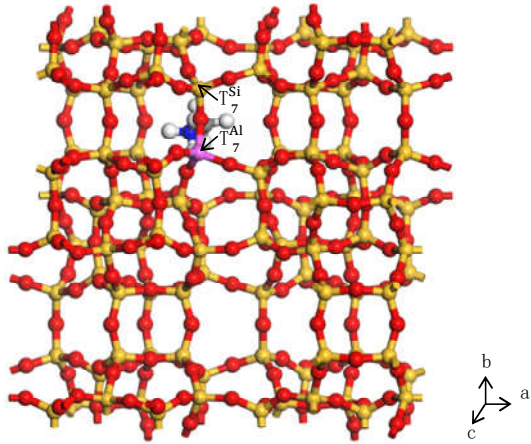

$T_7^{Al}-O^H-T_7^{Si}$

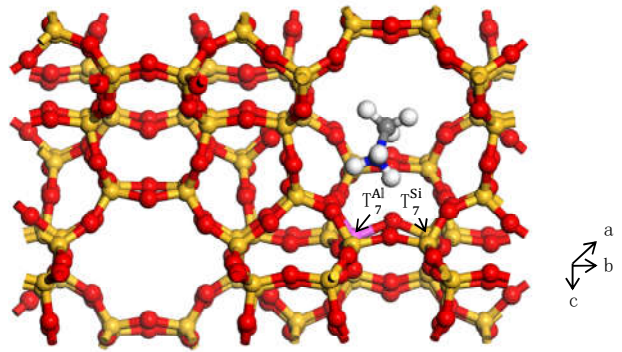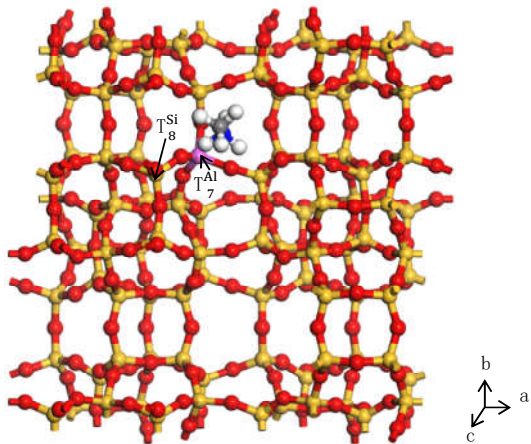

$T_7^{Al}-O^H-T_8^{Si}$

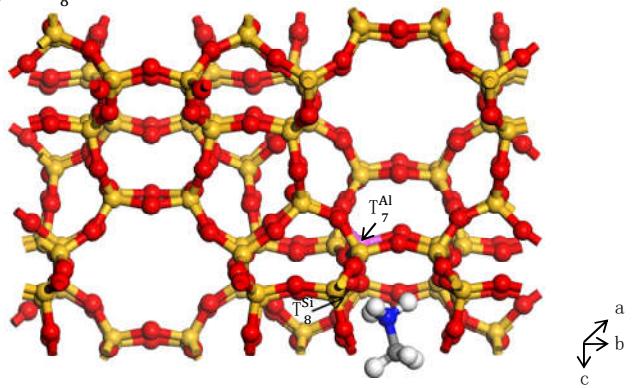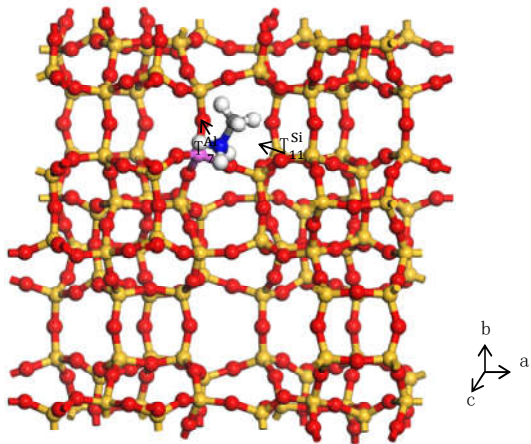

$T_7^{Al}-O^H-T_{11}^{Si}$

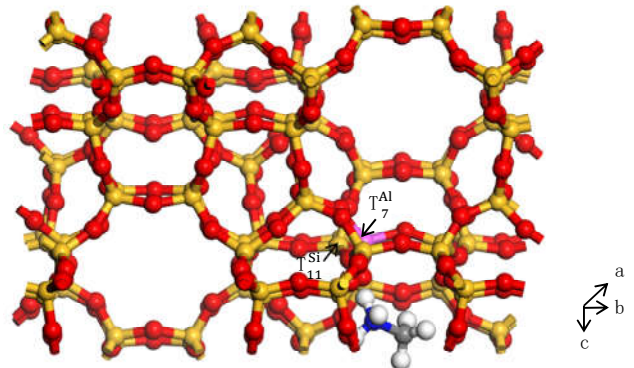

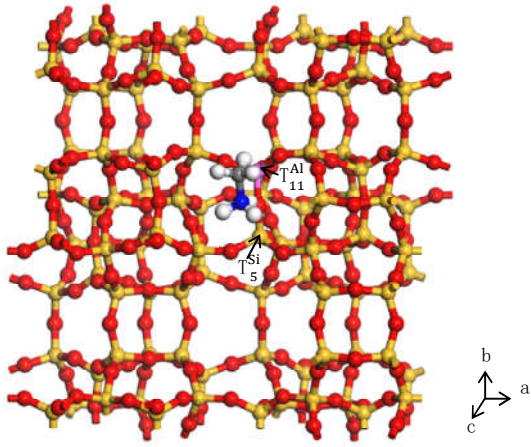

$T_{11}^{Al}-O^H-T_5^{Si}$

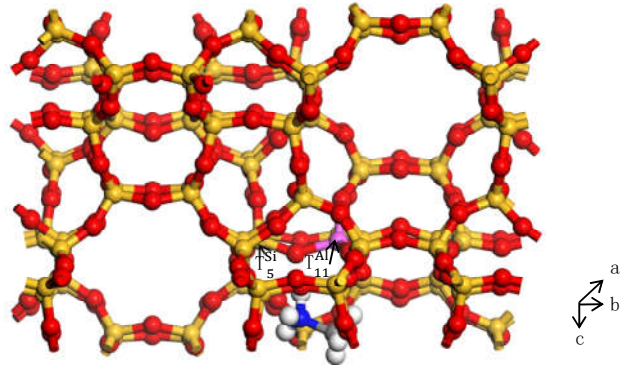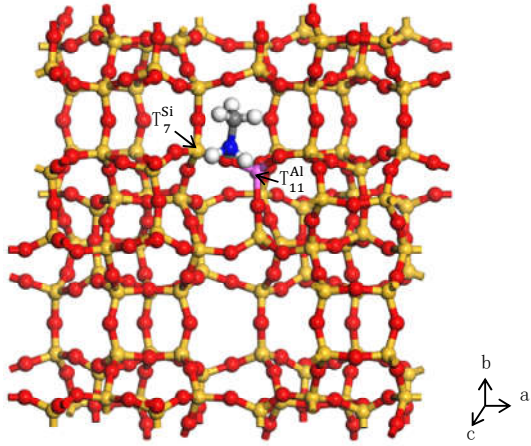

$T_{11}^{Al}-O^H-T_7^{Si}$

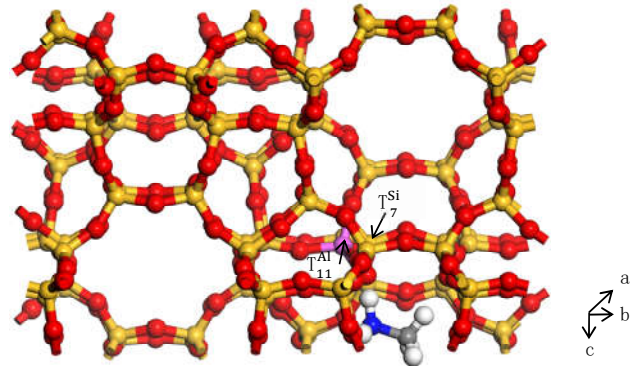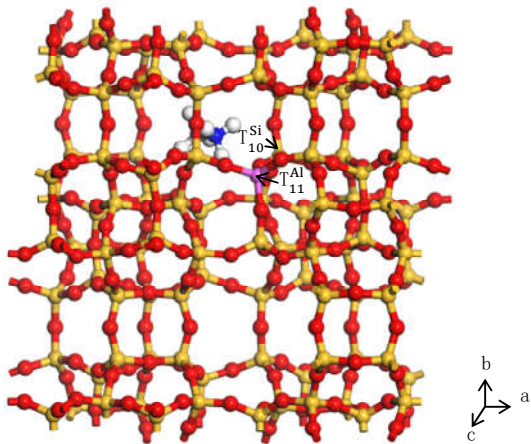

$T_{11}^{Al}-O^H-T_{10}^{Si}$

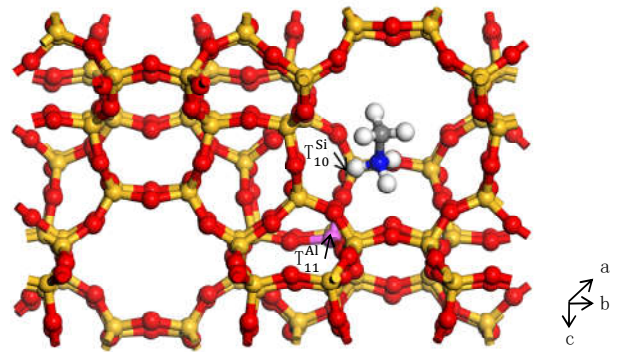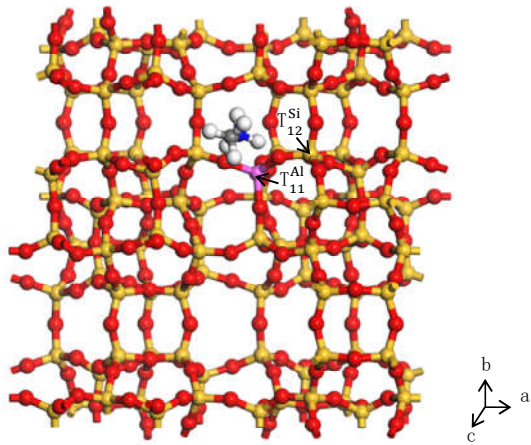

$T_{11}^{Al}-O^H-T_{12}^{Si}$

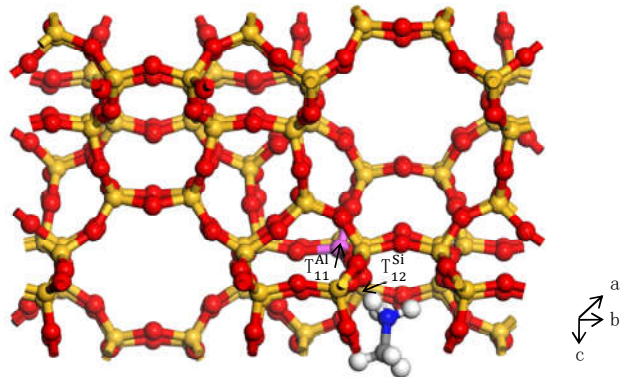

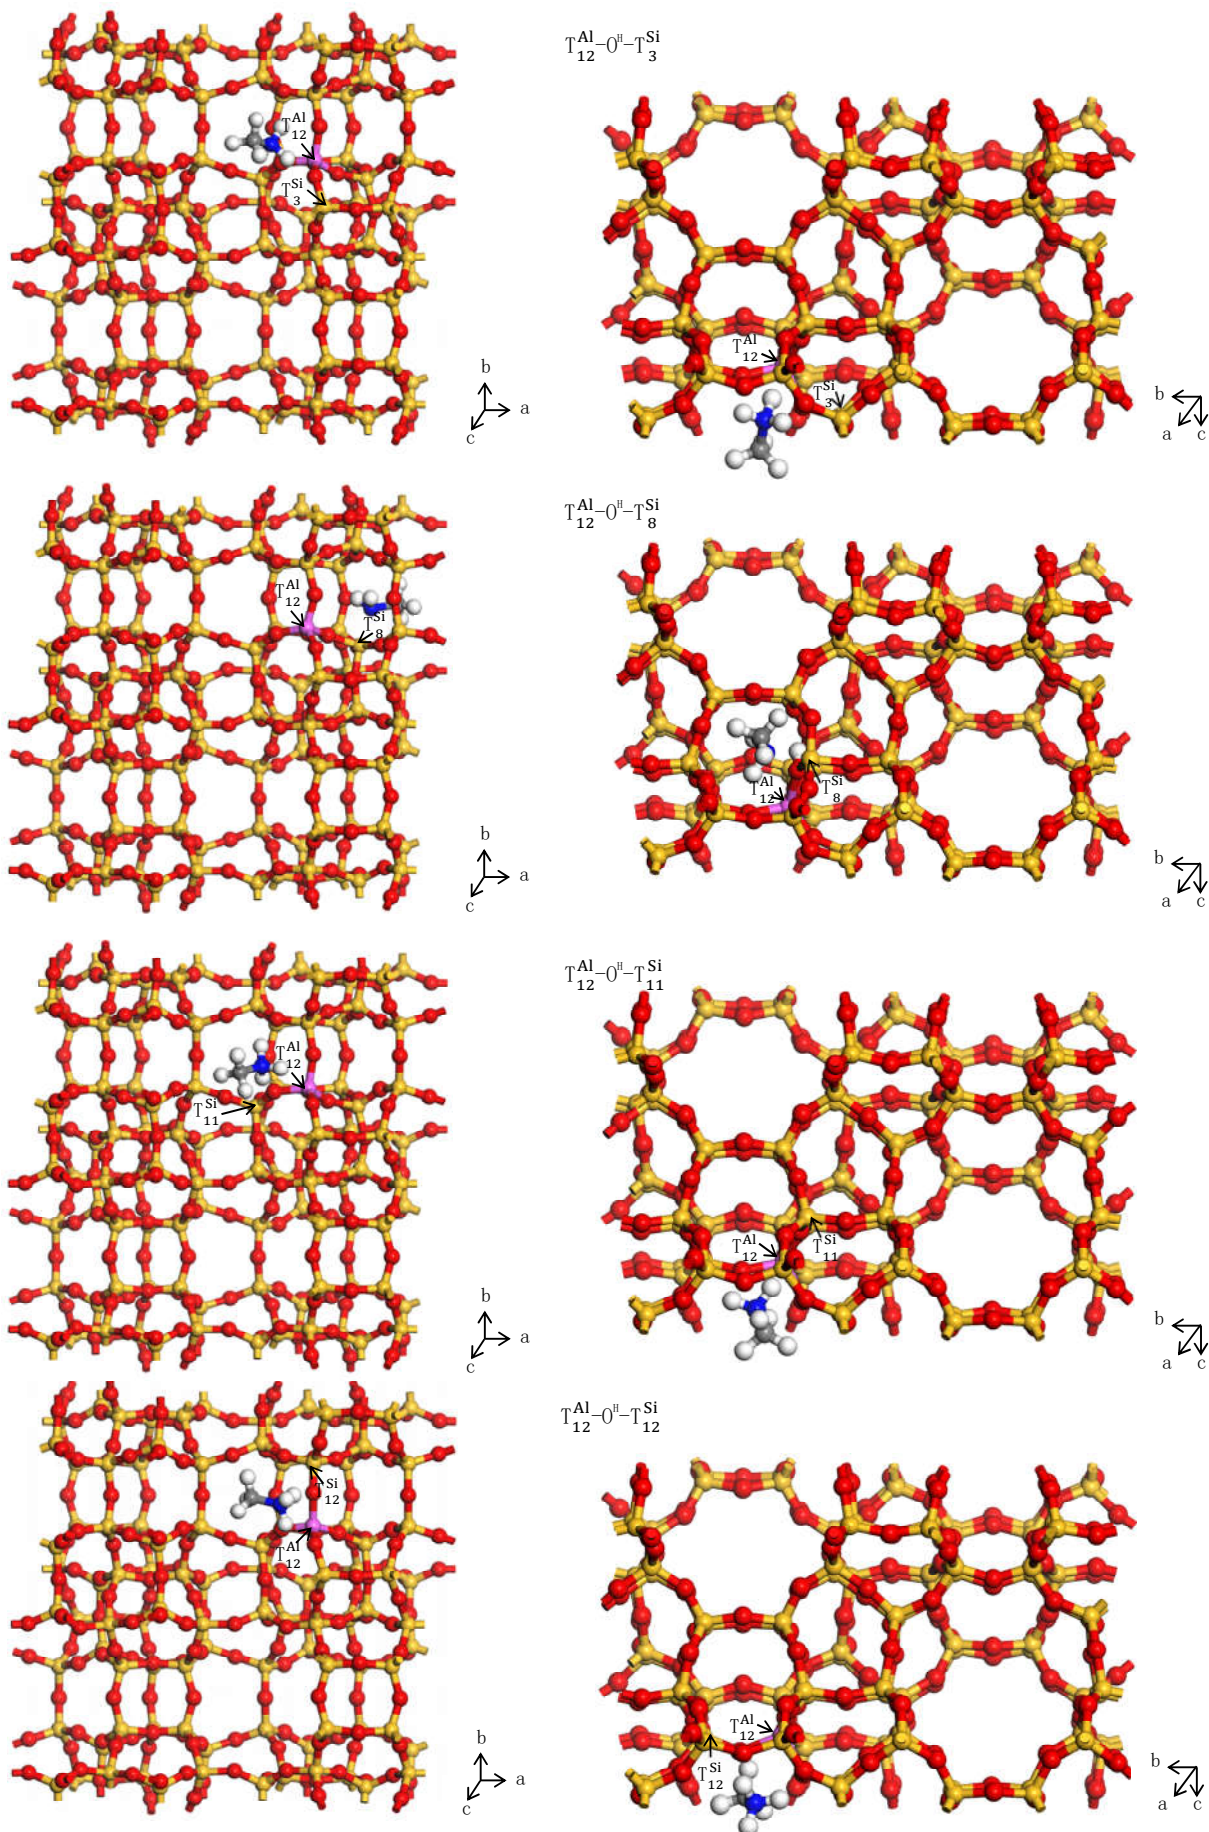

Figure S5 The optimized configurations of the adsorption of  $NH_2CH_3$  at the acidic sites of the Al substituted T1, T3, T5, T7, T11 and T12 sites in the framework

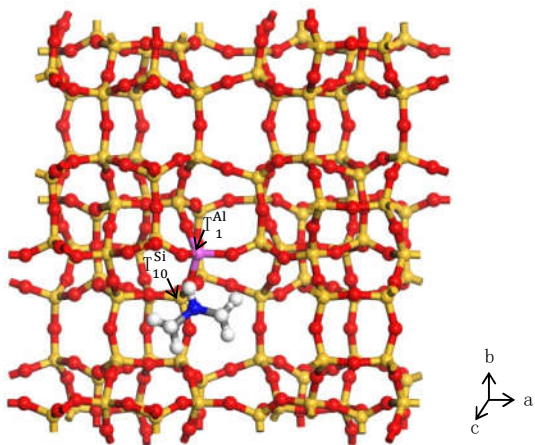

$T_1^{Al}-O^H-T_{10}^{Si}$

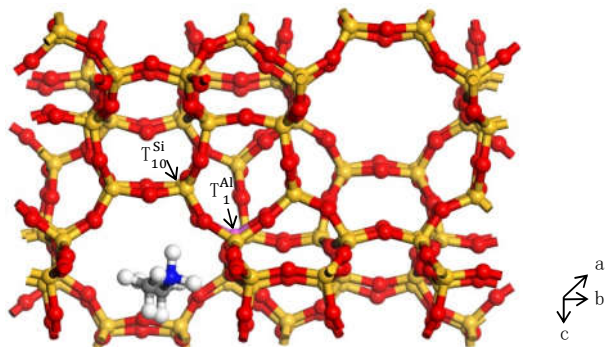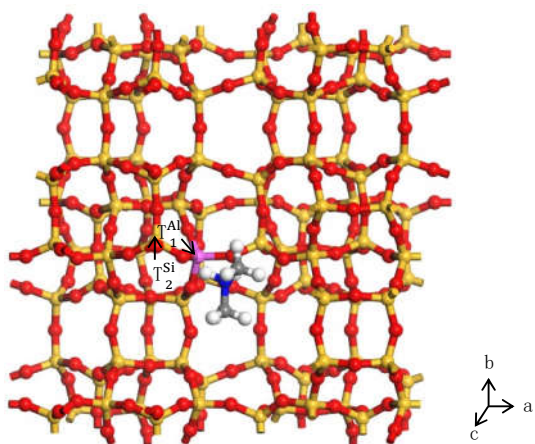

$T_1^{Al}-O^H-T_2^{Si}$

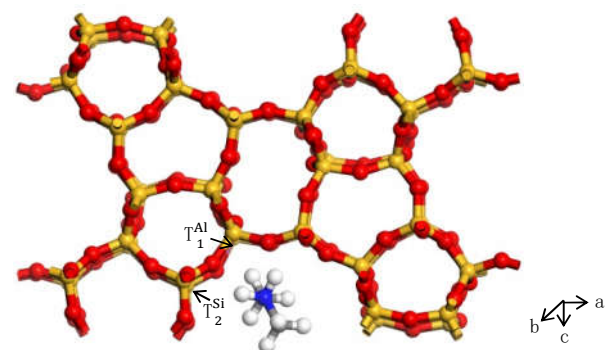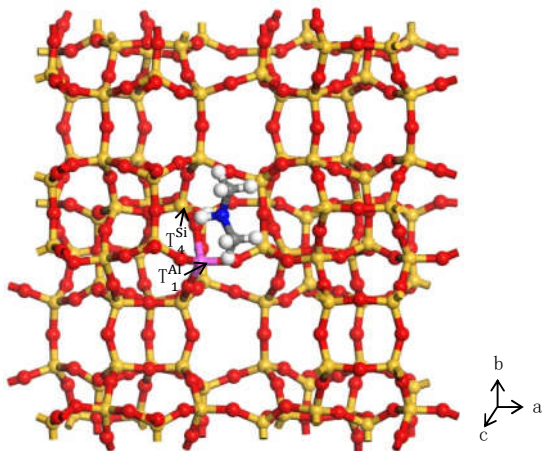

$T_1^{Al}-O^H-T_4^{Si}$

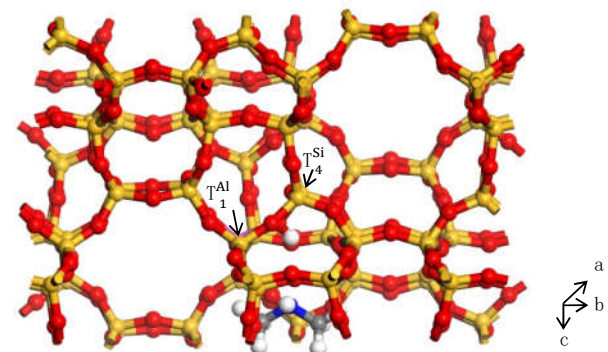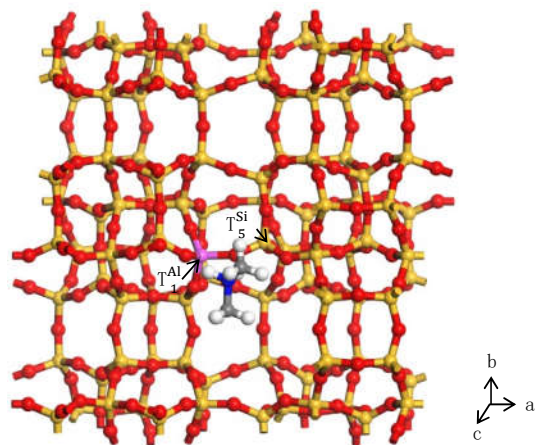

$T_1^{Al}-O^H-T_5^{Si}$

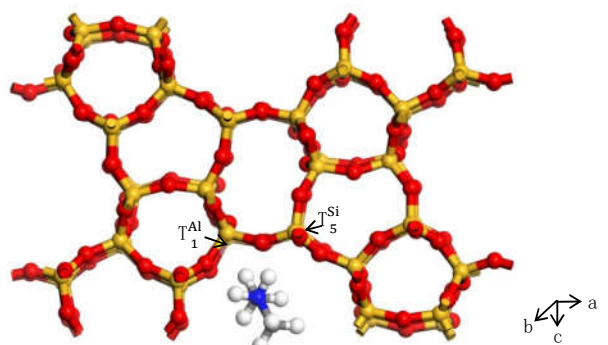

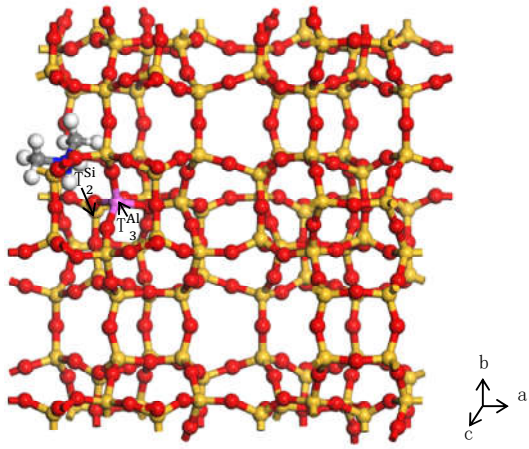

$T_{3}^{Al}-O^{H}-T_{2}^{Si}$

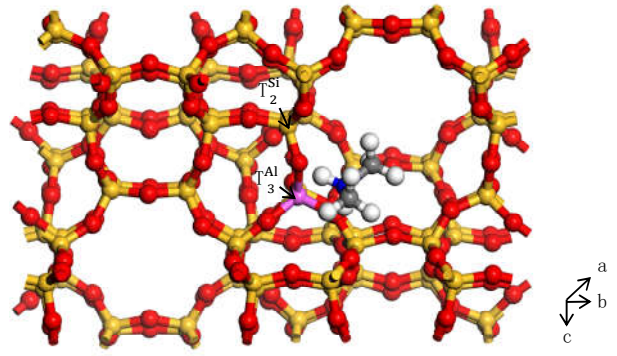

$T_{3}^{Al}-O^{H}-T_{6}^{Si}$

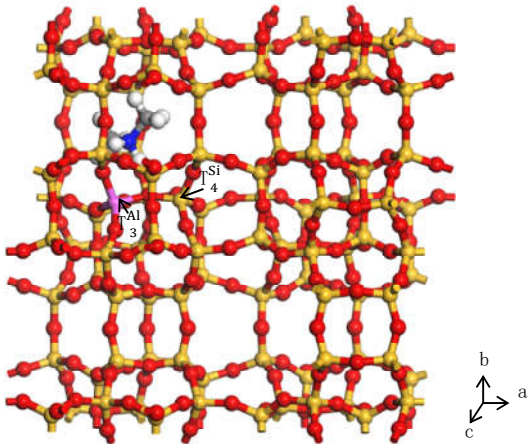

$T_{3}^{Al}-O^{H}-T_{12}^{Si}$

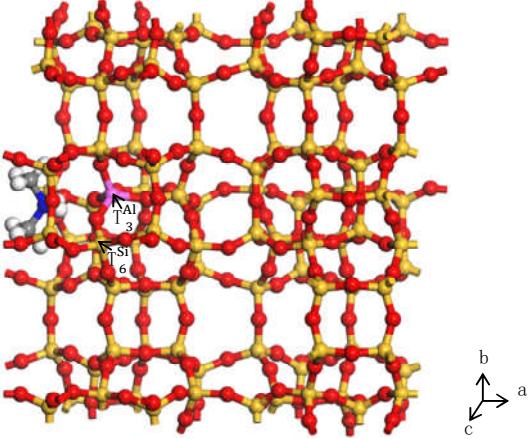

$T_{3}^{Al}-O^{H}-T_{12}^{Si}$

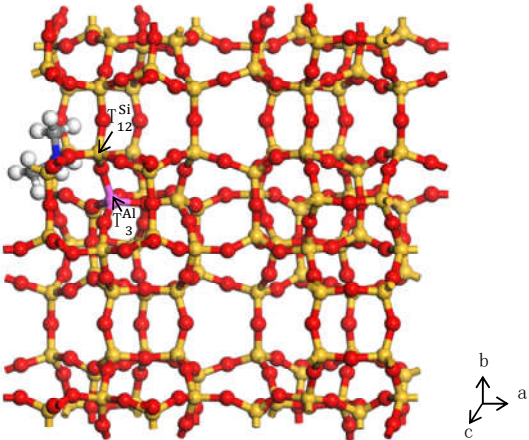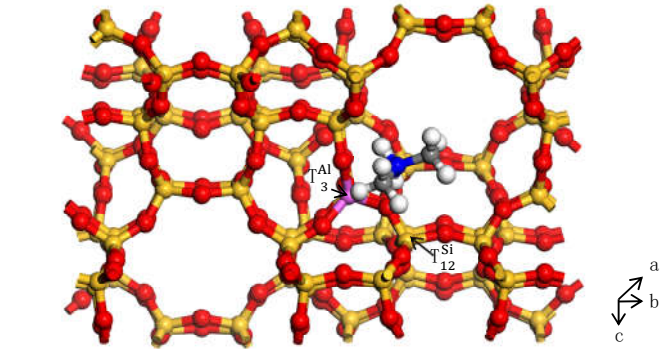

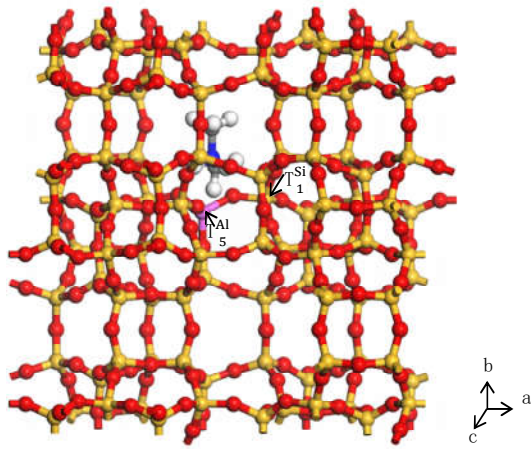

$T_5^{Al}-O^H-T_1^{Si}$

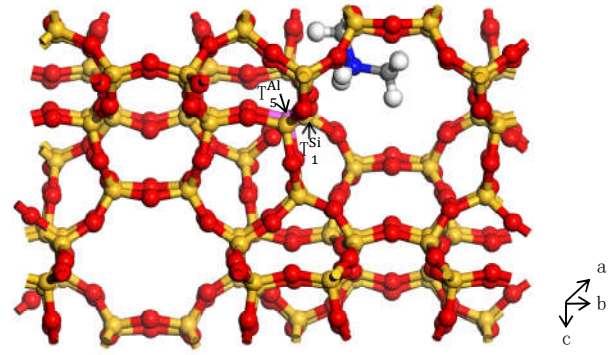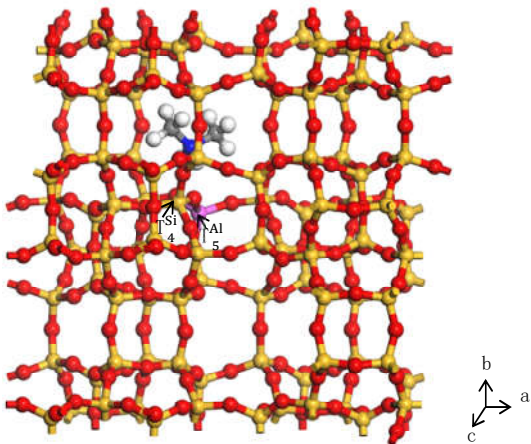

$T_5^{Al}-O^H-T_4^{Si}$

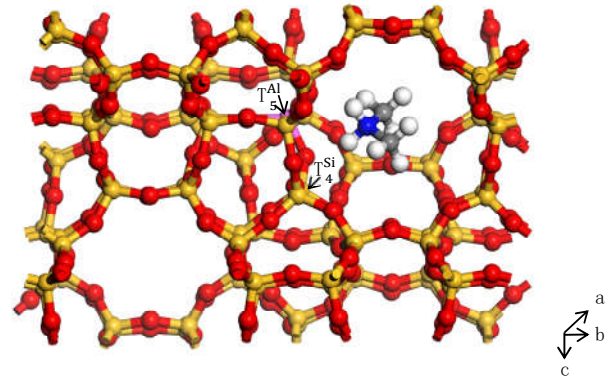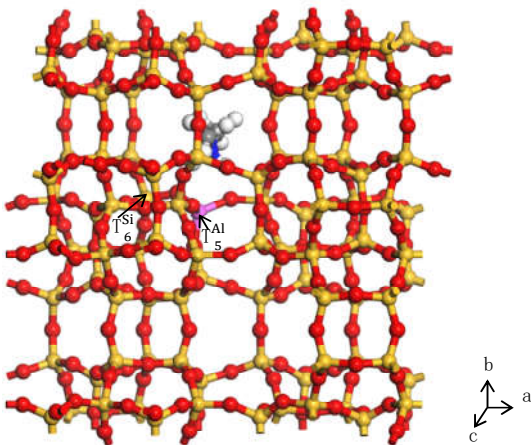

$T_5^{Al}-O^H-T_6^{Si}$

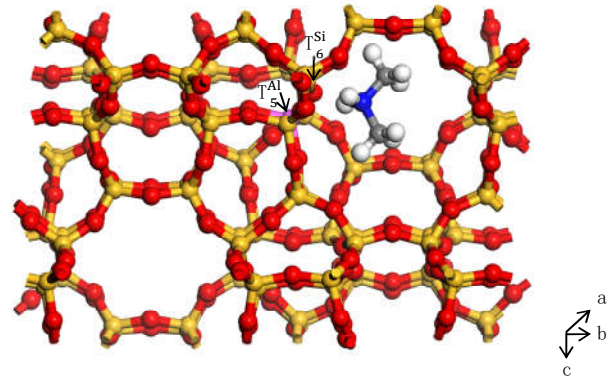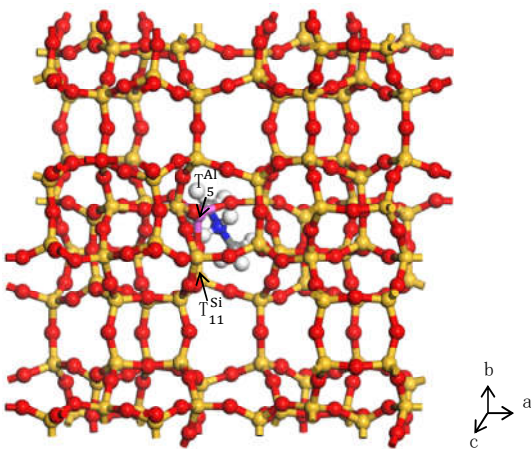

$T_5^{Al}-O^H-T_{11}^{Si}$

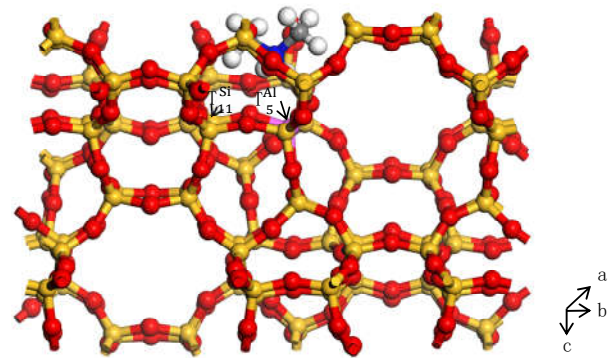

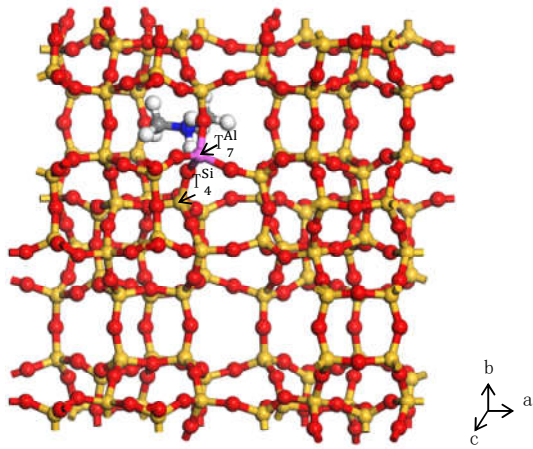

$T_7^{\text{Al}}-O^{\text{H}}-T_4^{\text{Si}}$

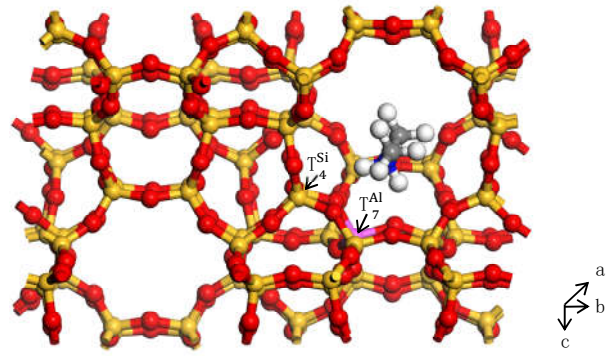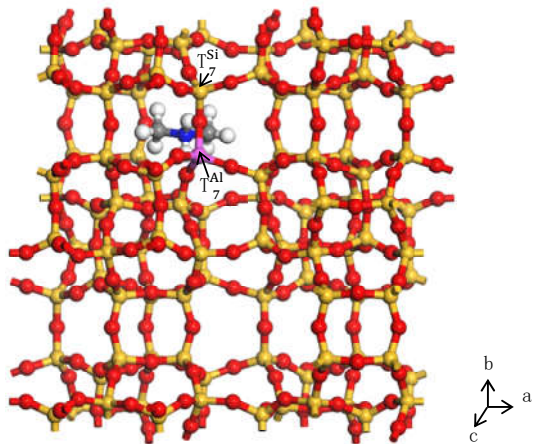

$T_7^{\text{Al}}-O^{\text{H}}-T_7^{\text{Si}}$

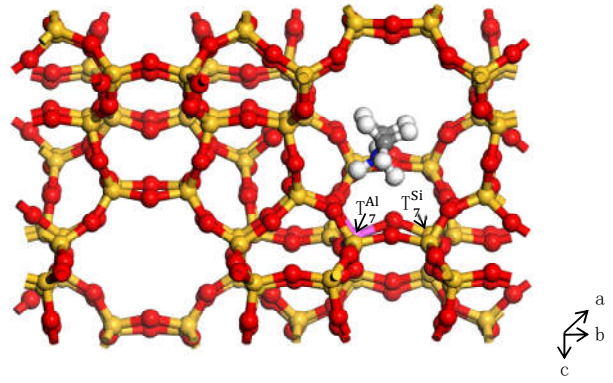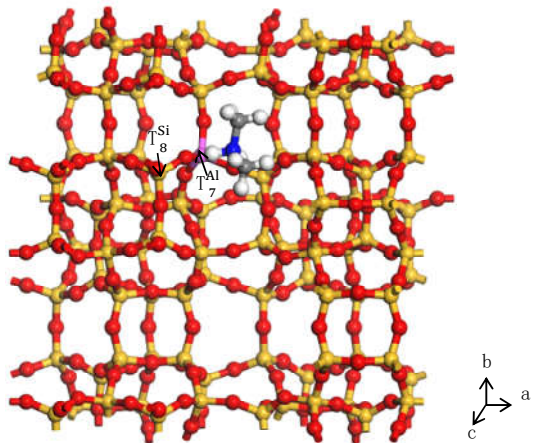

$T_7^{\text{Al}}-O^{\text{H}}-T_8^{\text{Si}}$

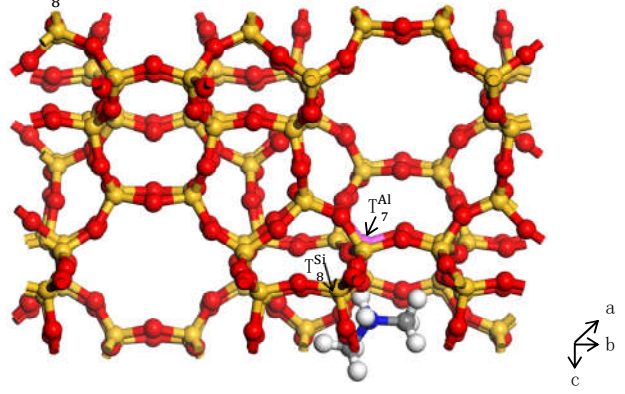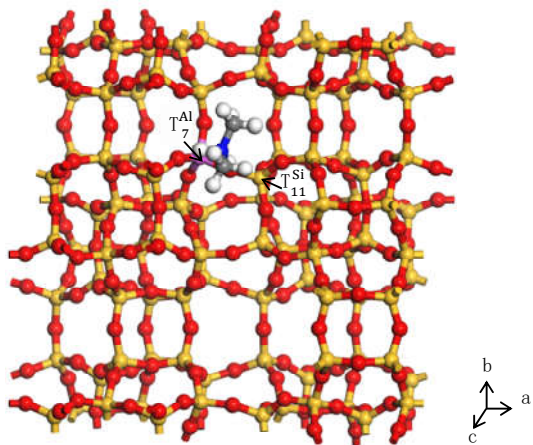

$T_7^{\text{Al}}-O^{\text{H}}-T_{11}^{\text{Si}}$

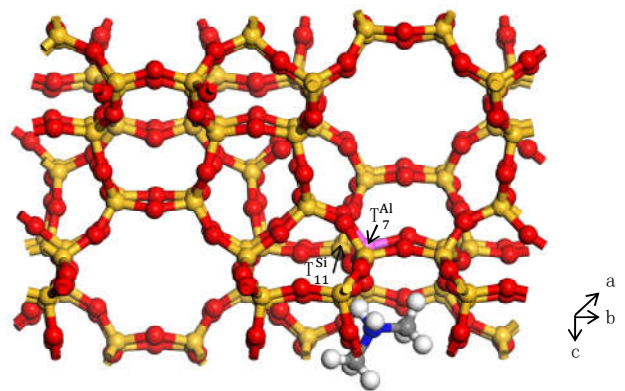

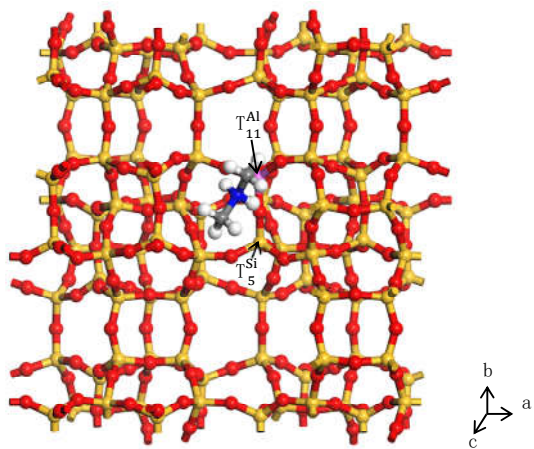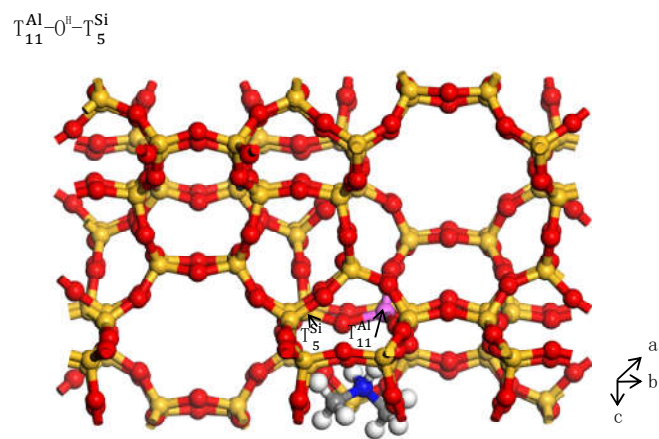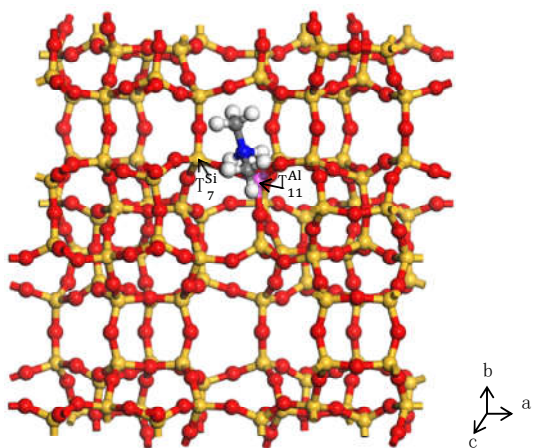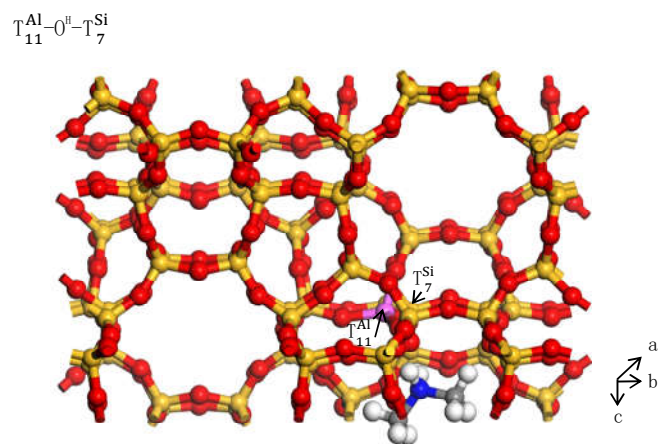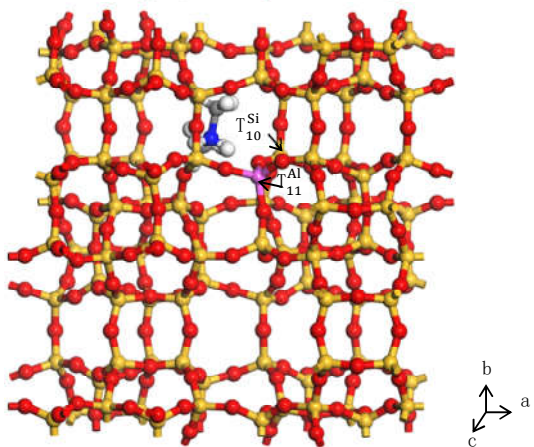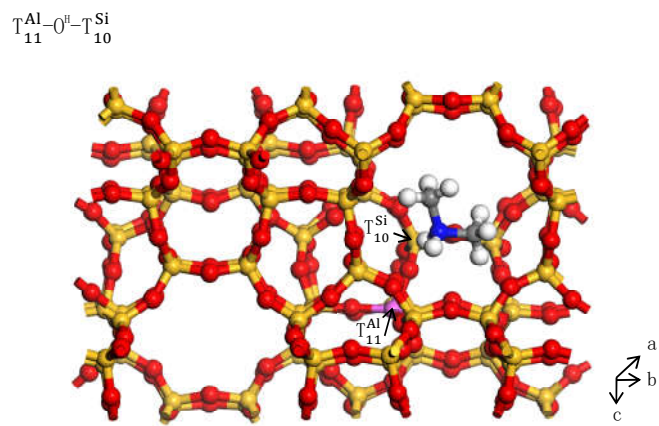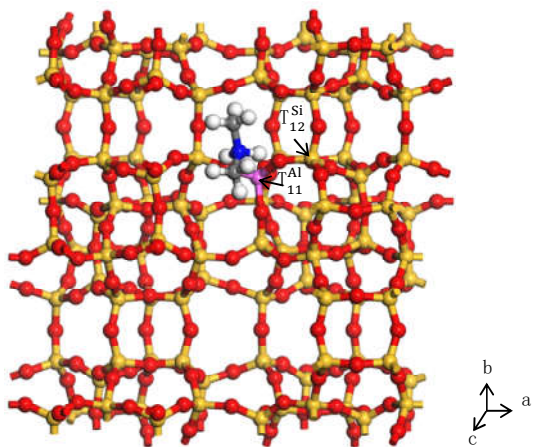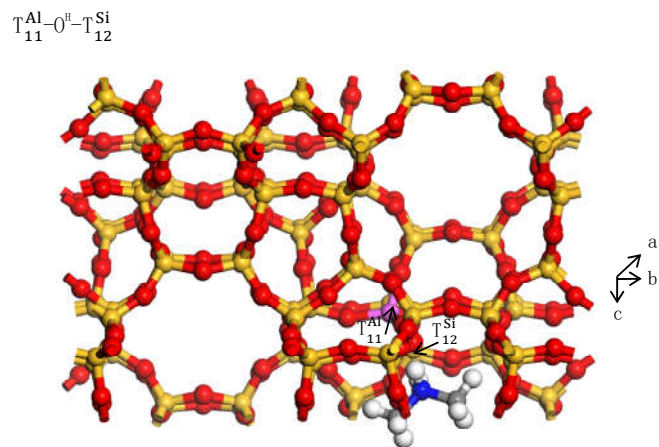



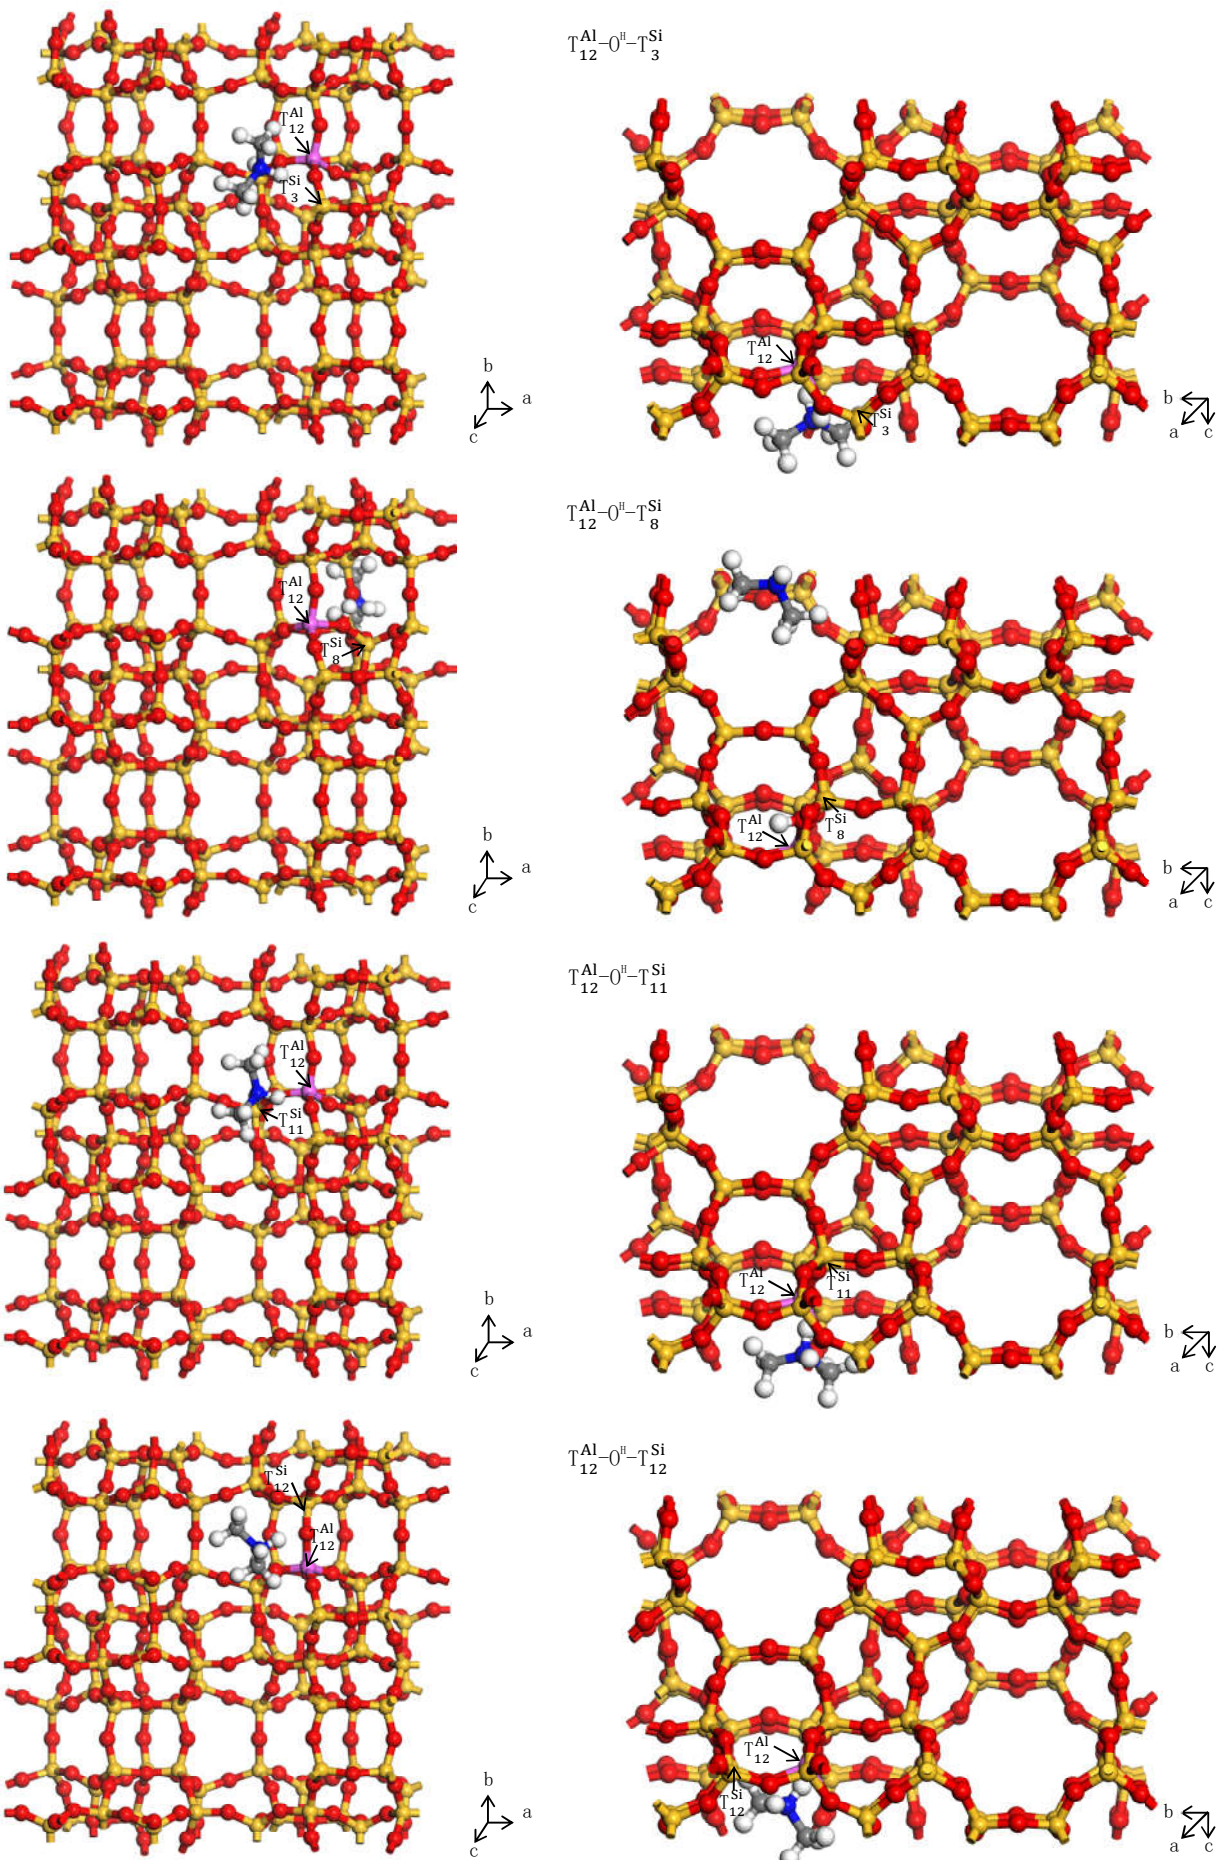

Figure S6 The optimized configurations of the adsorption of  $NH(CH_3)_2$  at the acidic sites of the Al substituted T1, T3, T5, T7, T11 and T12 sites in the framework

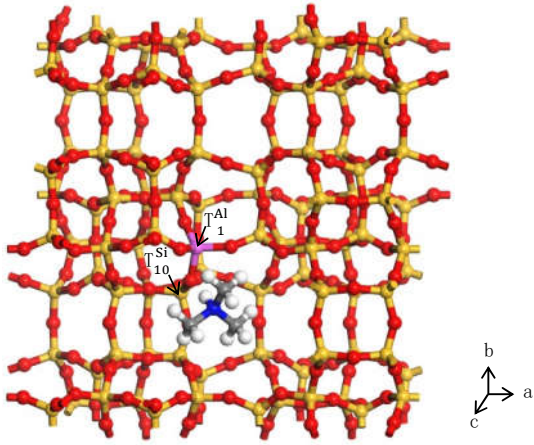

$T_1^{Al}-O^H-T_{10}^{Si}$

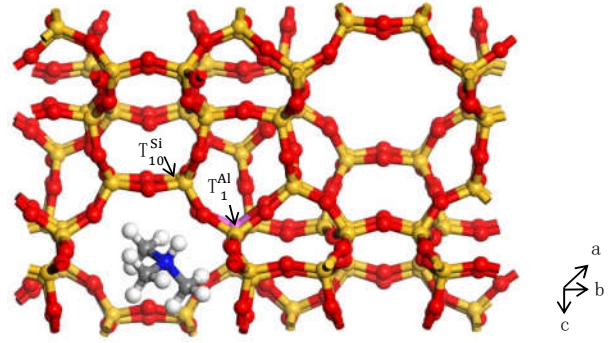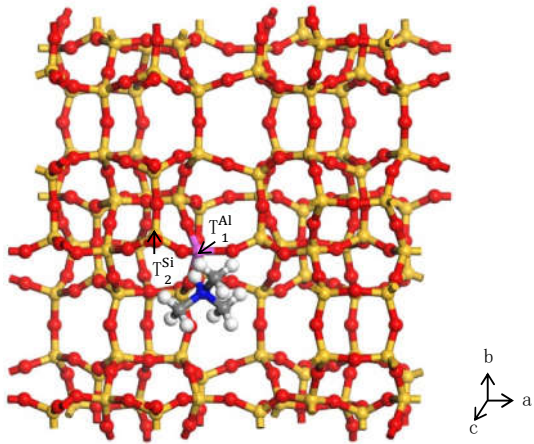

$T_1^{Al}-O^H-T_2^{Si}$

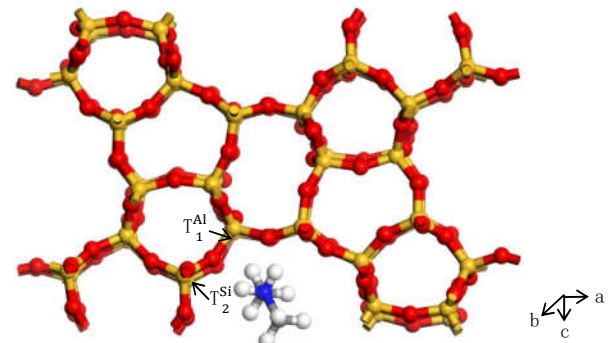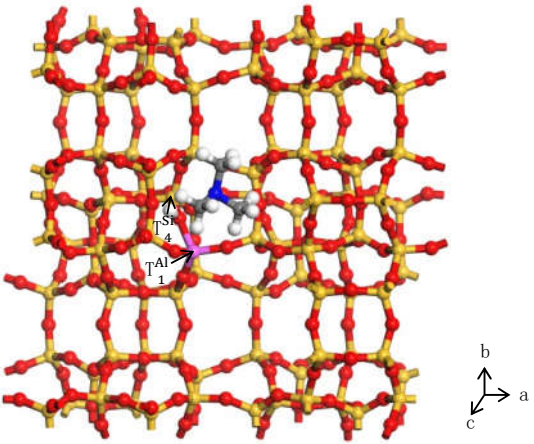

$T_1^{Al}-O^H-T_4^{Si}$

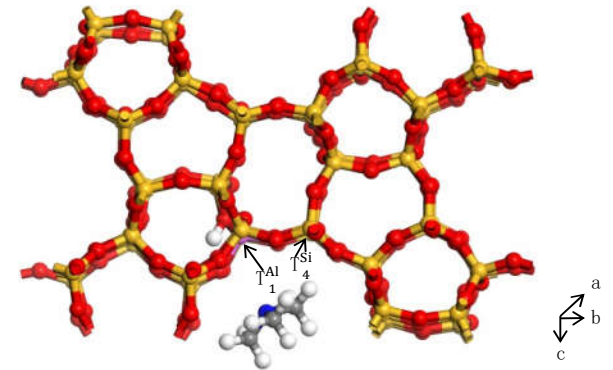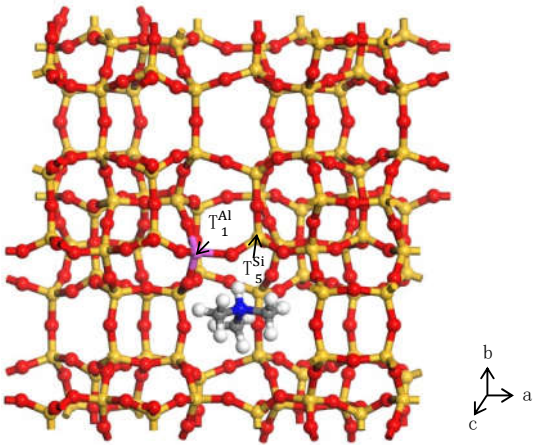

$T_1^{Al}-O^H-T_5^{Si}$

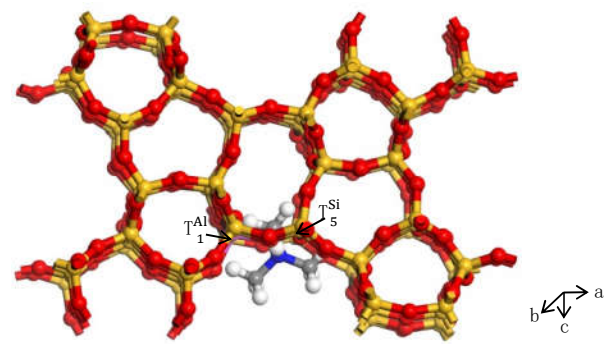

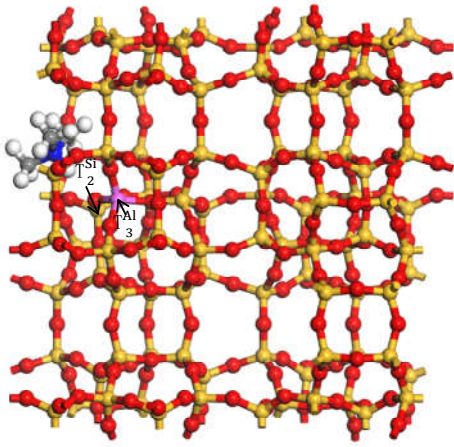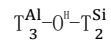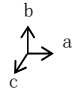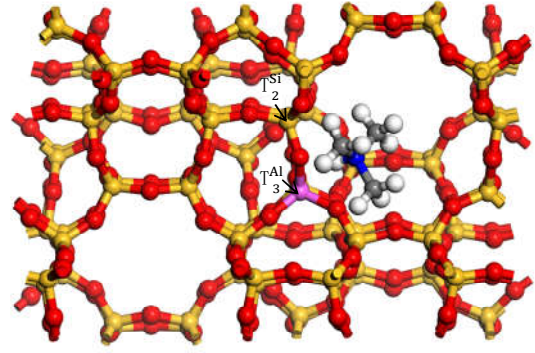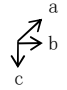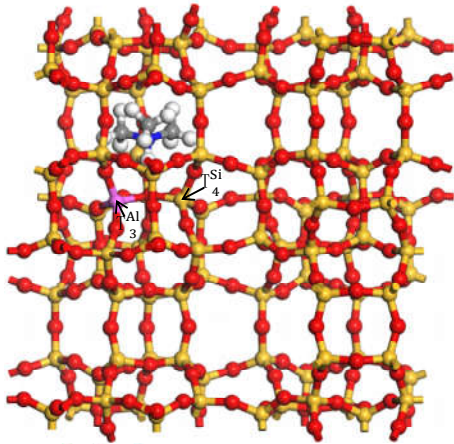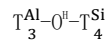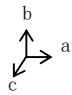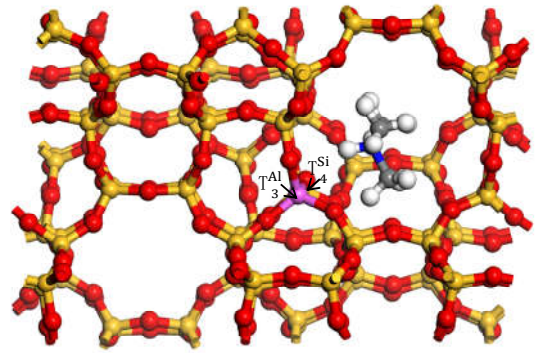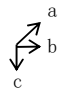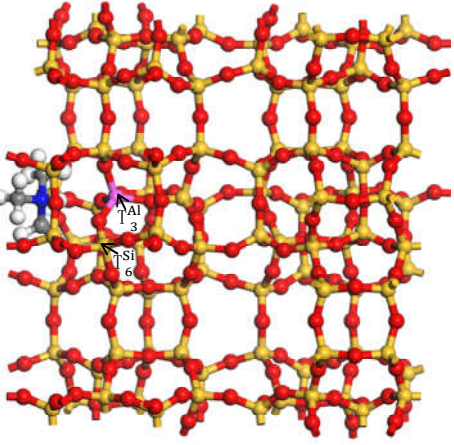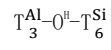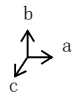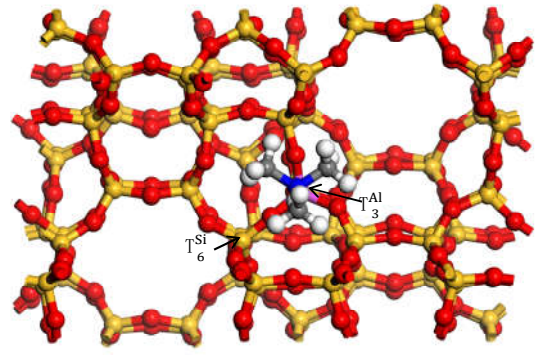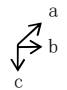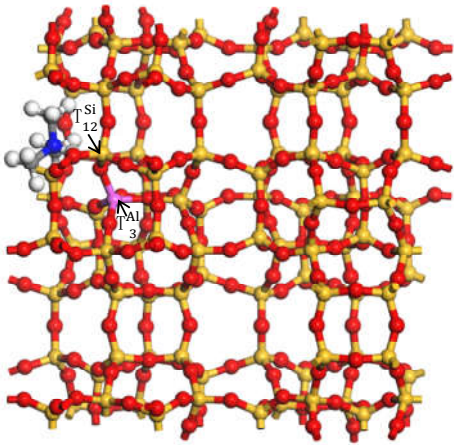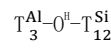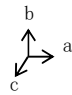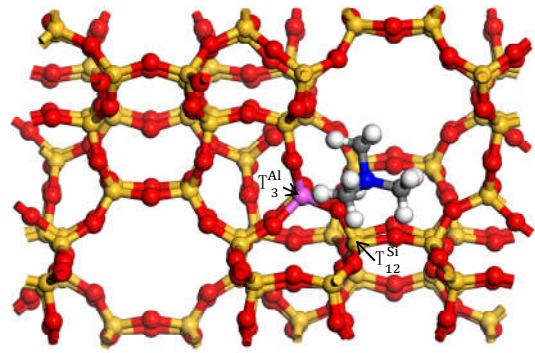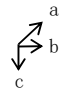

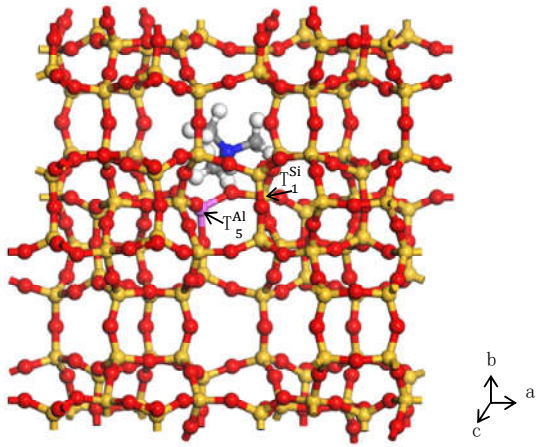

$\Gamma_{5}^{\text{Al}}-\text{O}^{\text{H}}-\Gamma_{1}^{\text{Si}}$

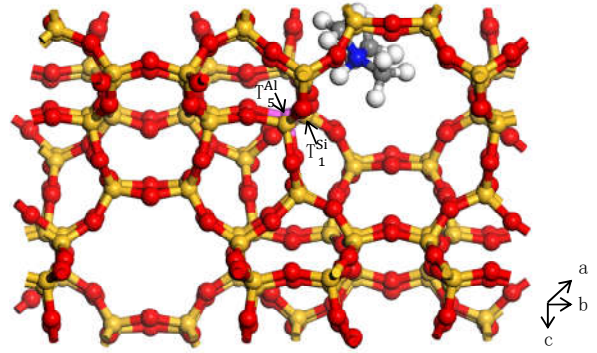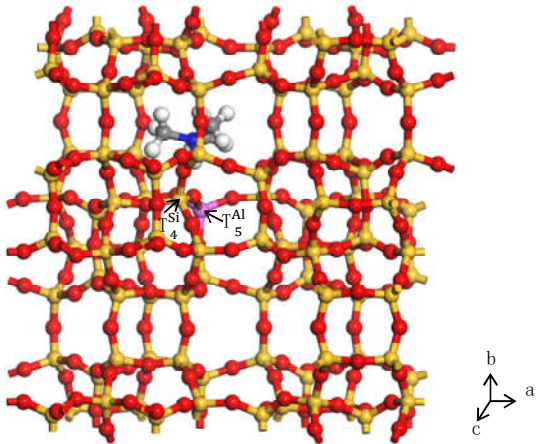

$\Gamma_{5}^{\text{Al}}-\text{O}^{\text{H}}-\Gamma_{4}^{\text{Si}}$

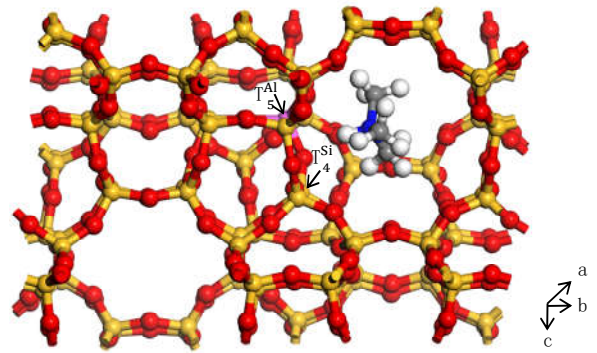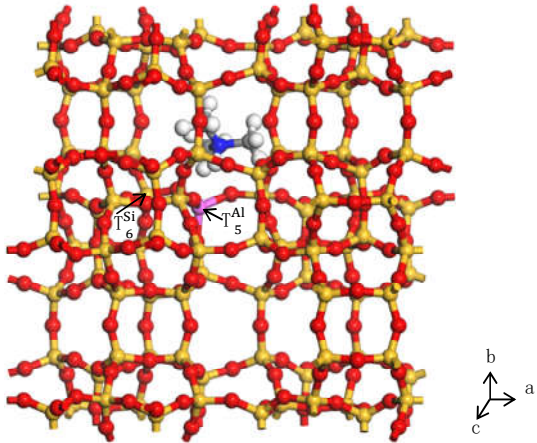

$\Gamma_{5}^{\text{Al}}-\text{O}^{\text{H}}-\Gamma_{6}^{\text{Si}}$

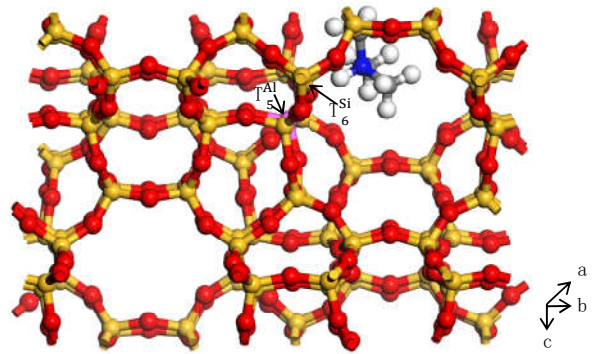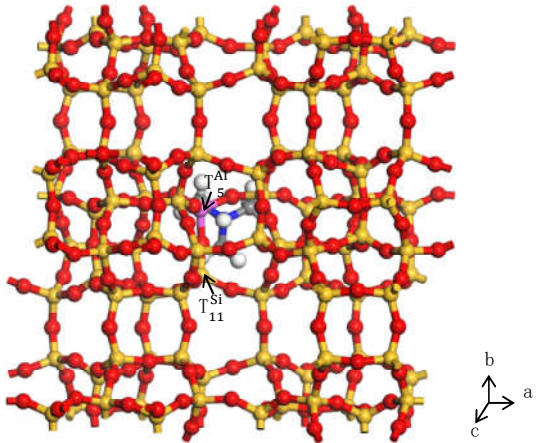

$\Gamma_{5}^{\text{Al}}-\text{O}^{\text{H}}-\Gamma_{11}^{\text{Si}}$

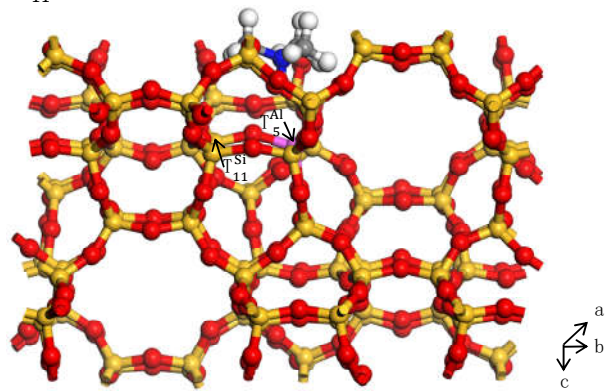

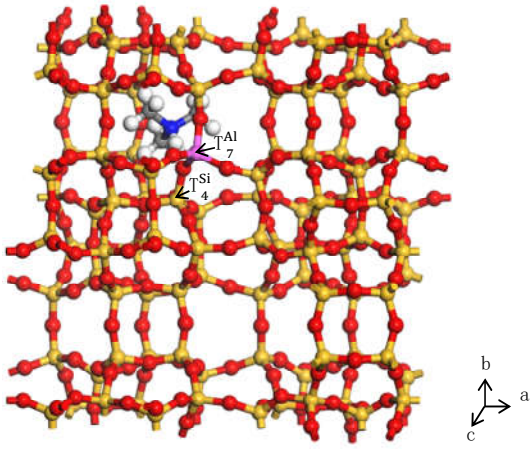

$T_7^{Al}-O^H-T_4^{Si}$

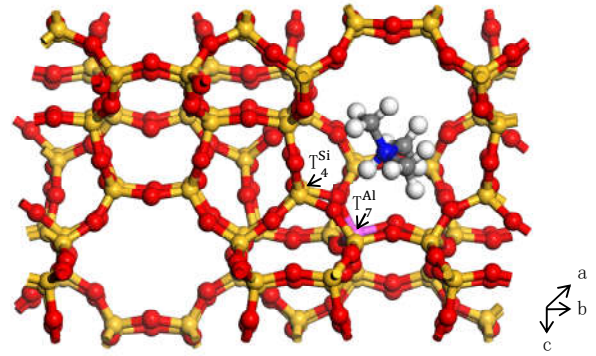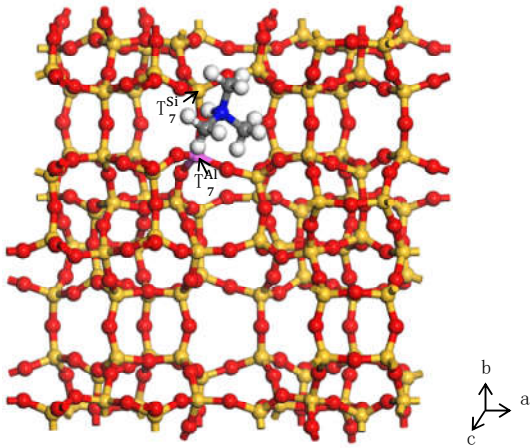

$T_7^{Al}-O^H-T_7^{Si}$

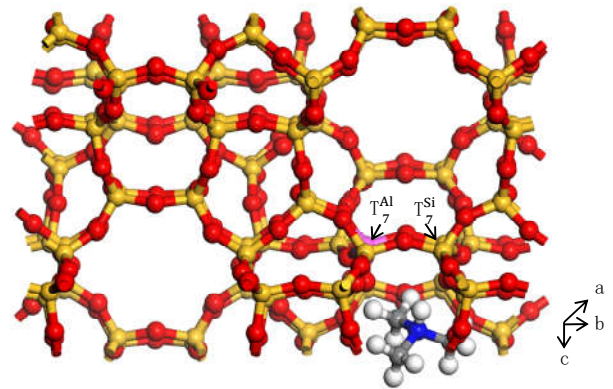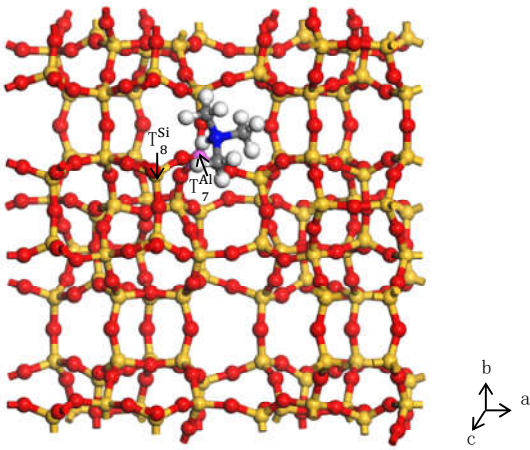

$T_7^{Al}-O^H-T_8^{Si}$

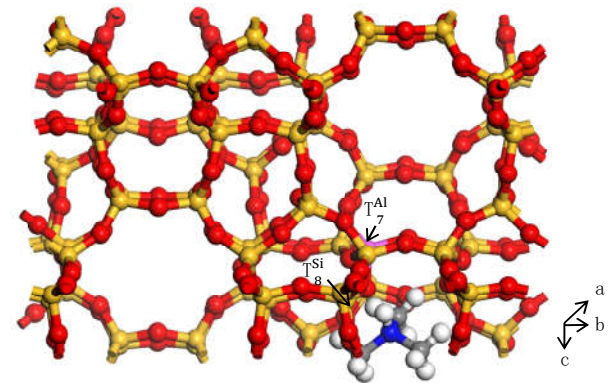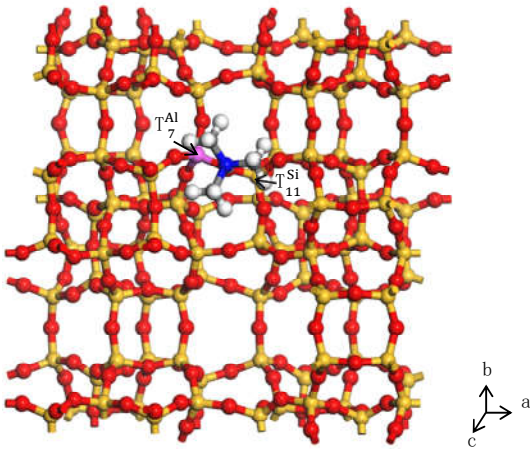

$T_7^{Al}-O^H-T_{11}^{Si}$

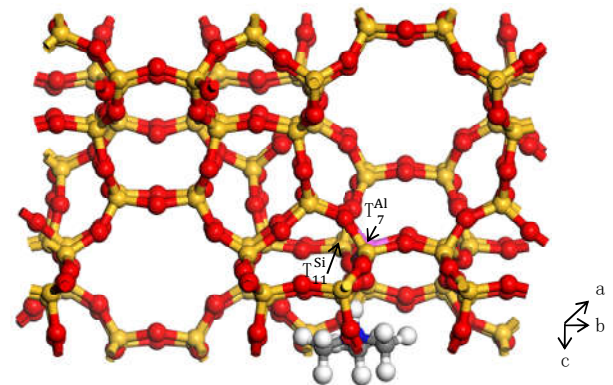

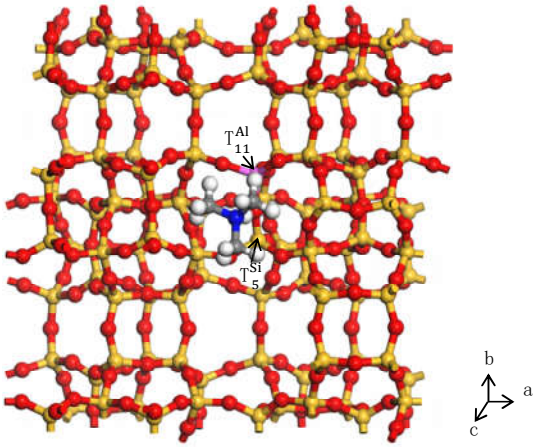

$T_{11}^{Al}-O^H-T_5^{Si}$

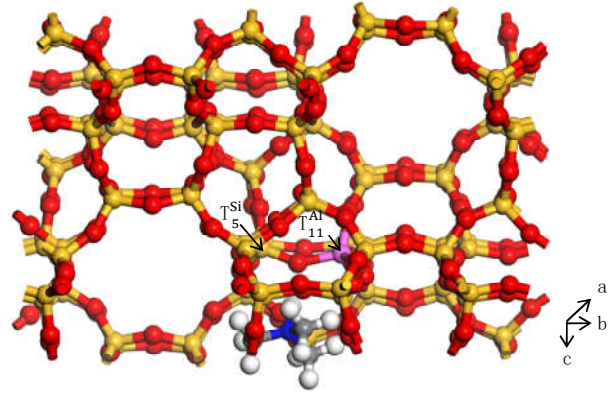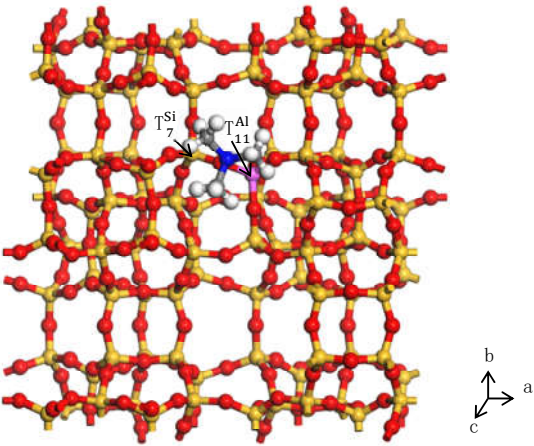

$T_{11}^{Al}-O^H-T_7^{Si}$

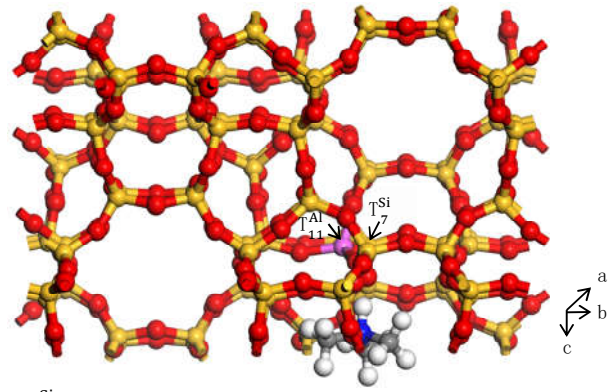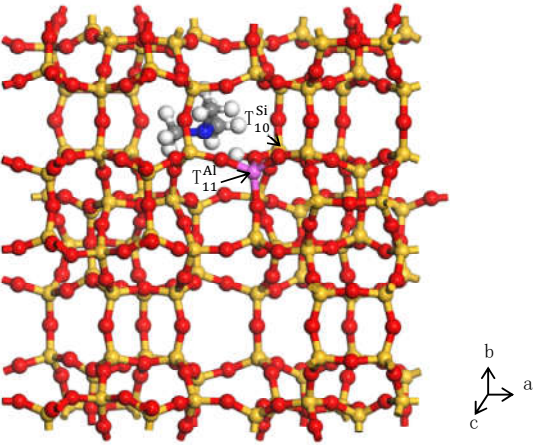

$T_{11}^{Al}-O^H-T_{10}^{Si}$

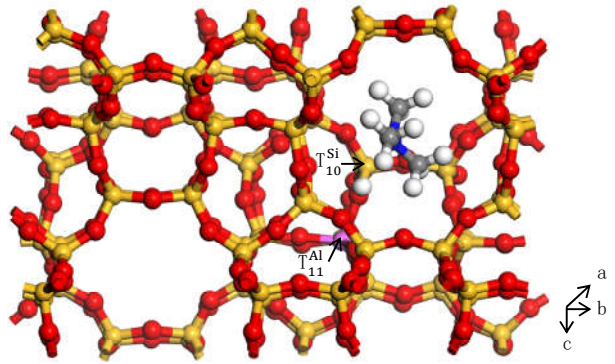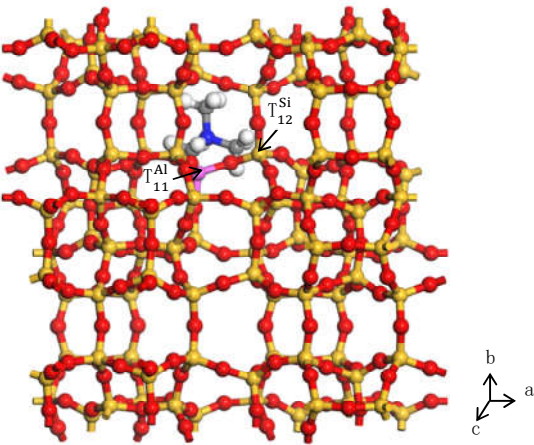

$T_{11}^{Al}-O^H-T_{12}^{Si}$

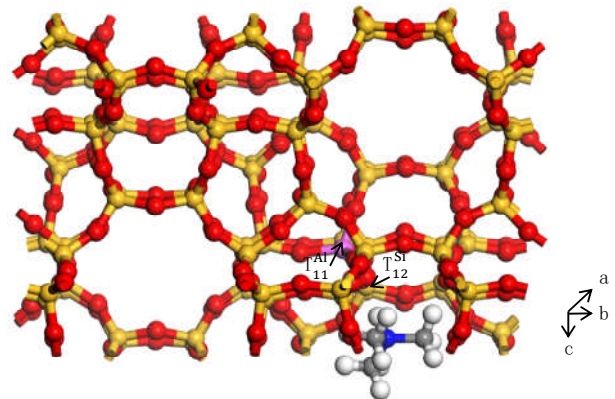

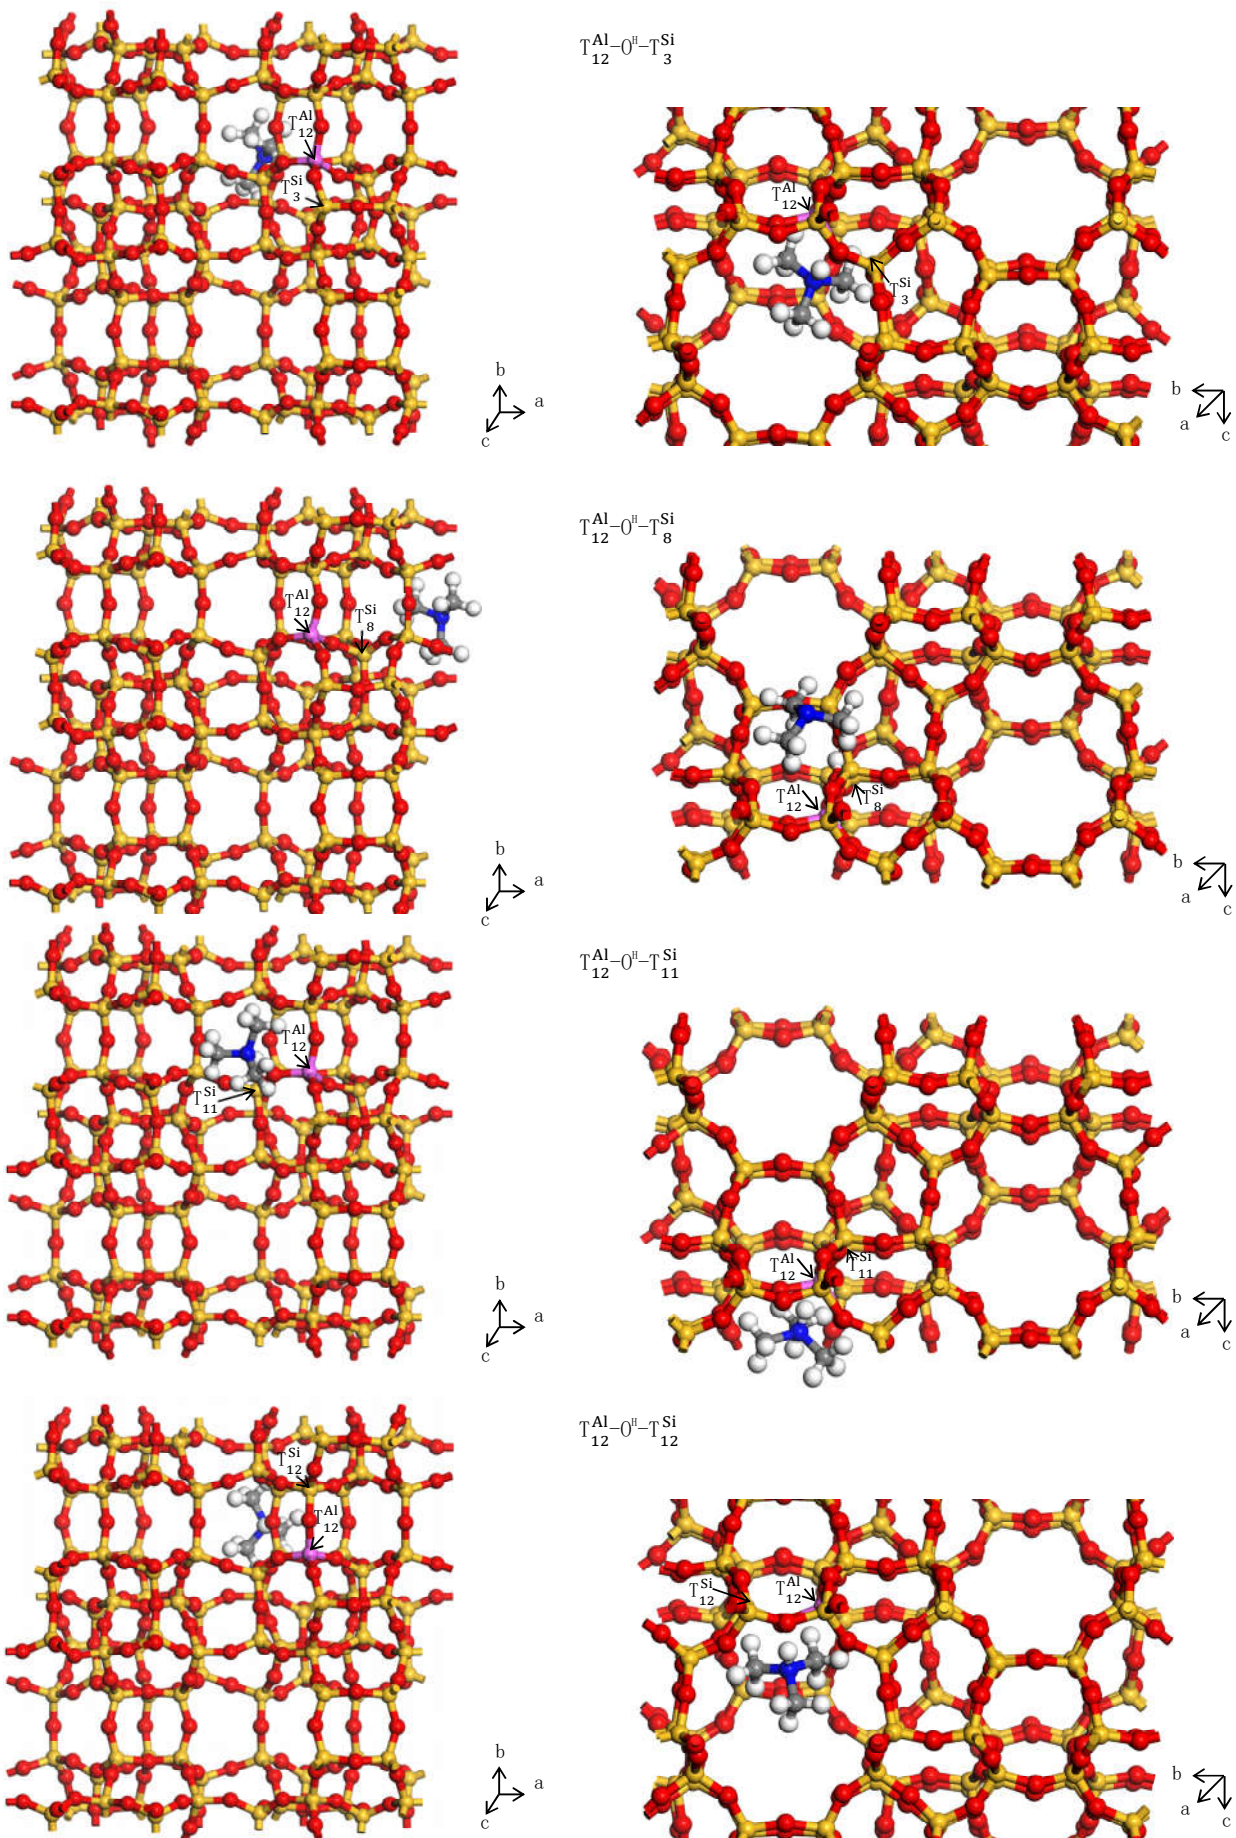

Figure S7 The optimized configurations of the adsorption of  $N(CH_3)_3$  at the acidic sites of the Al substituted T1, T3, T5, T7, T11 and T12 sites in the framework

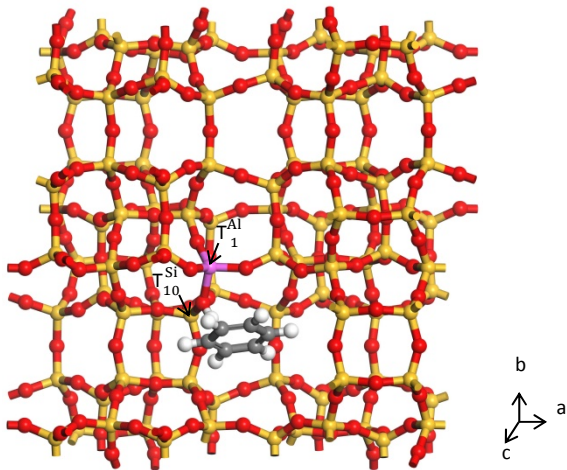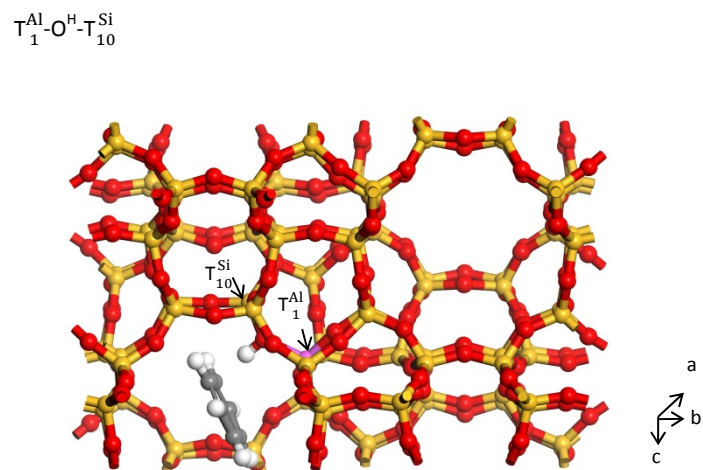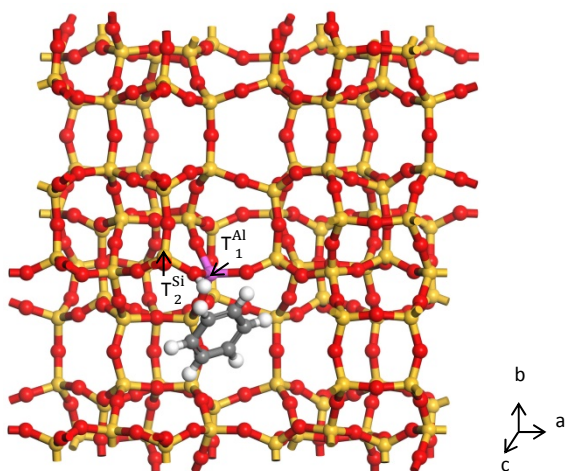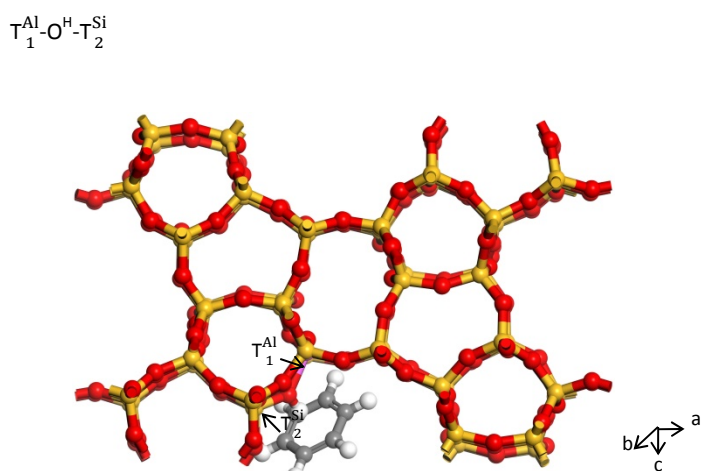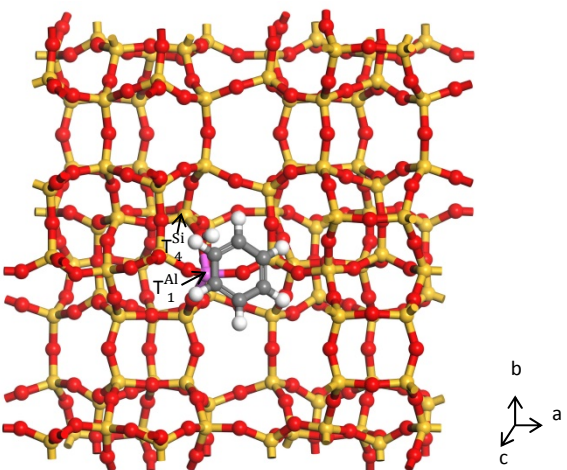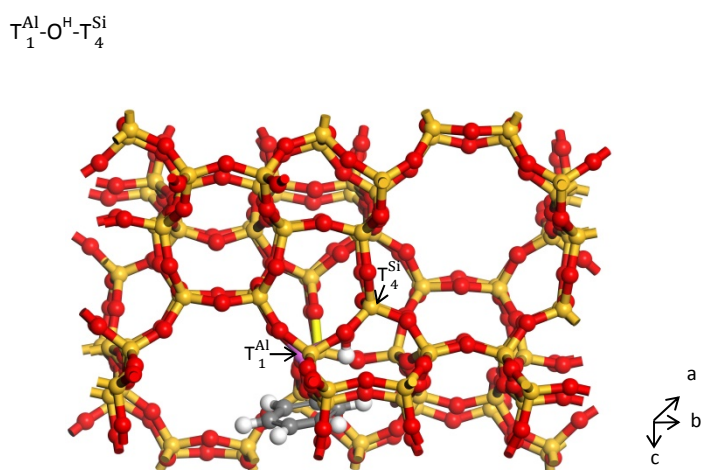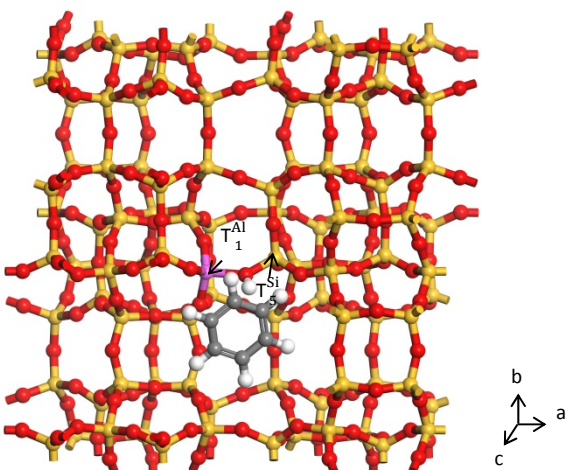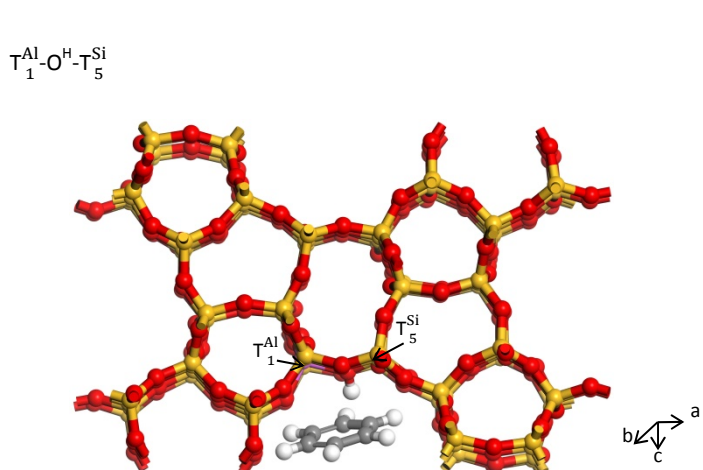



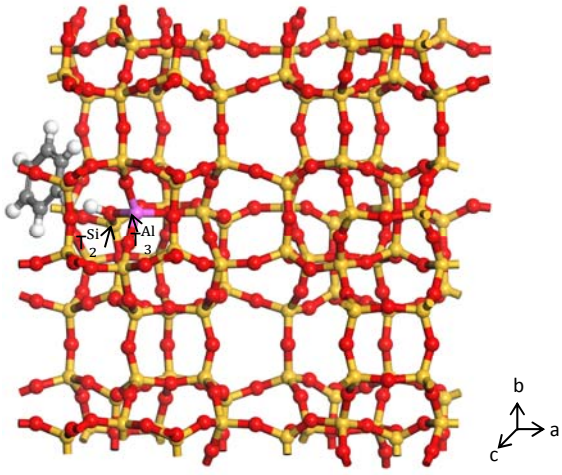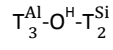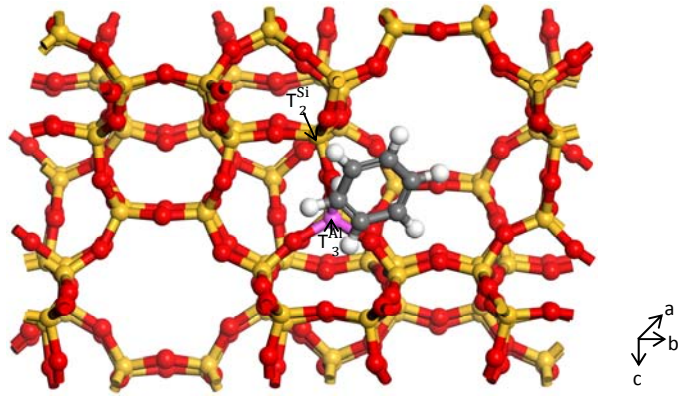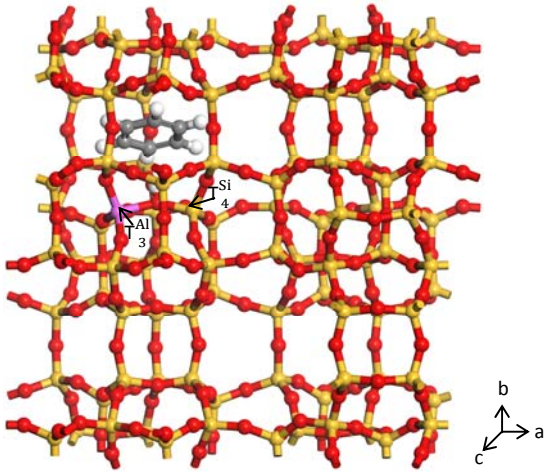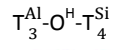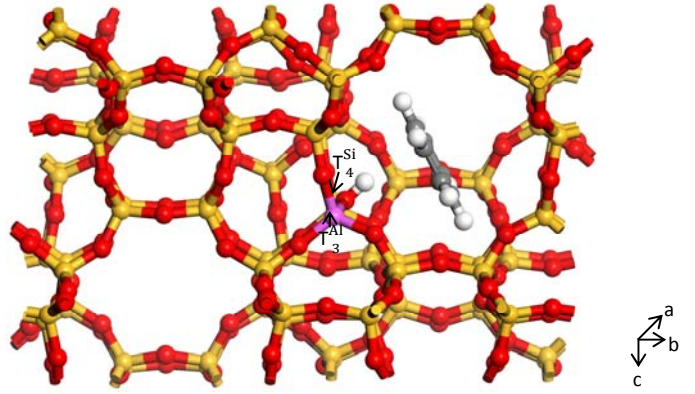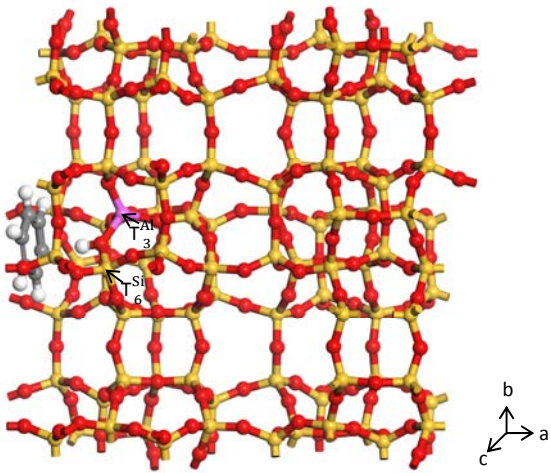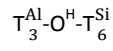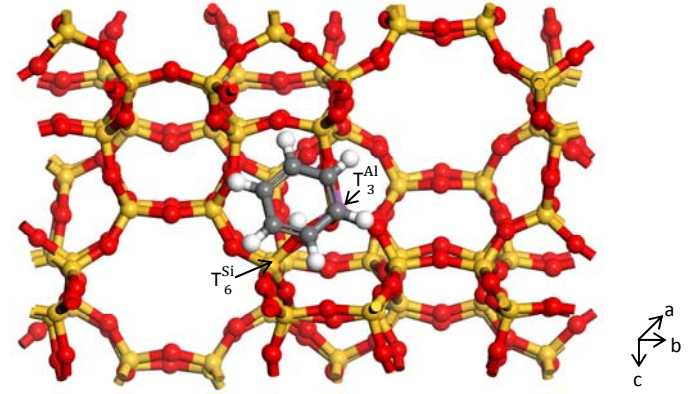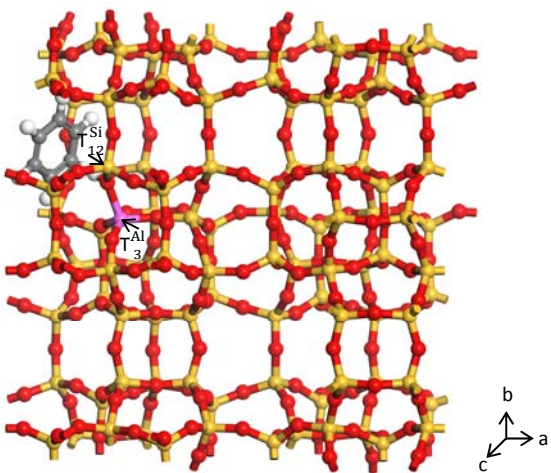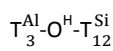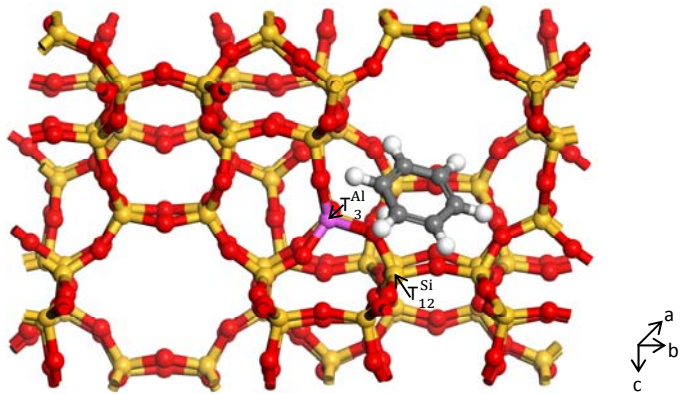

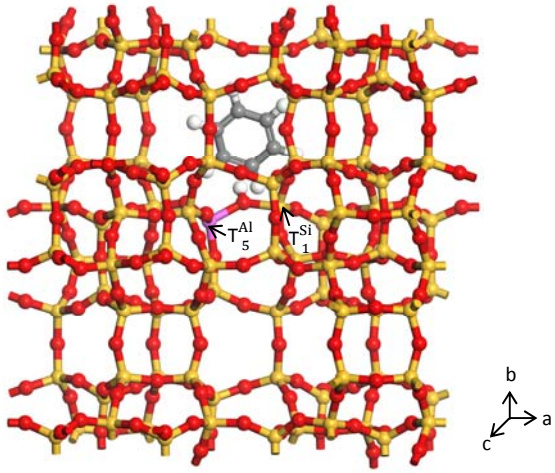

$T_5^{Al}-O^H-T_1^{Si}$

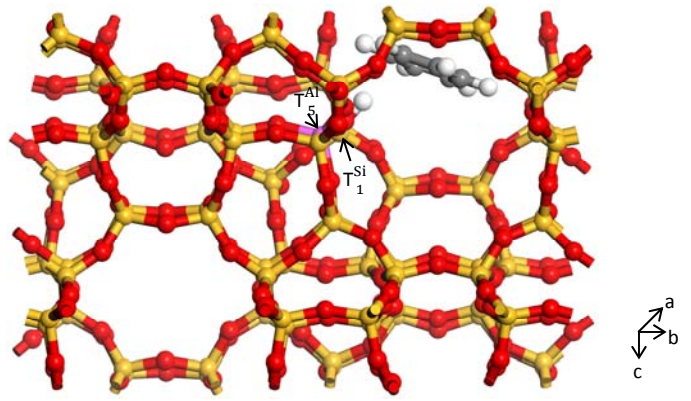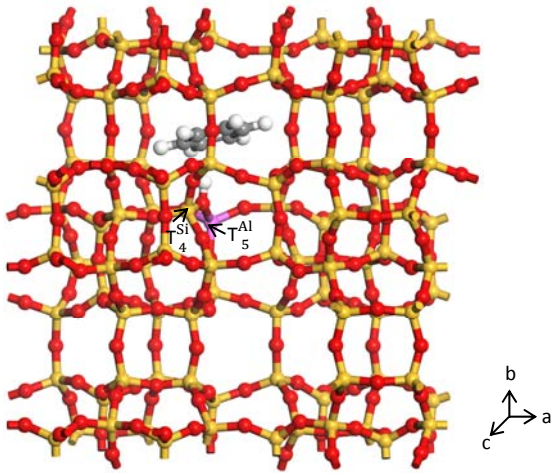

$T_5^{Al}-O^H-T_4^{Si}$

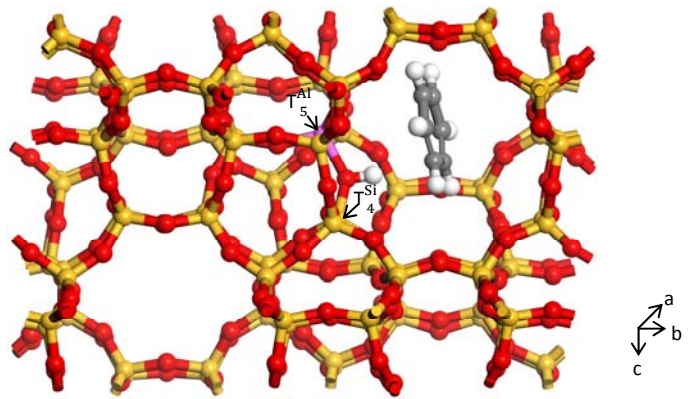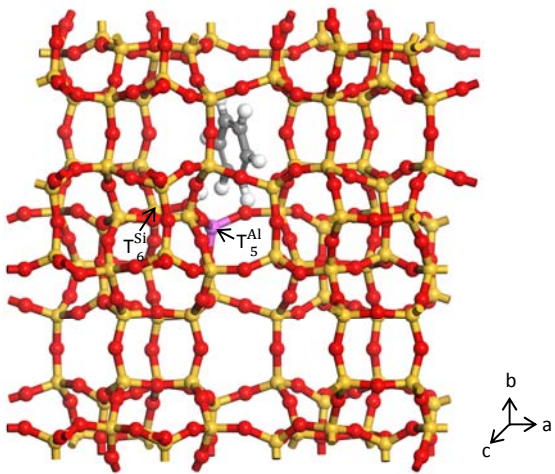

$T_5^{Al}-O^H-T_6^{Si}$

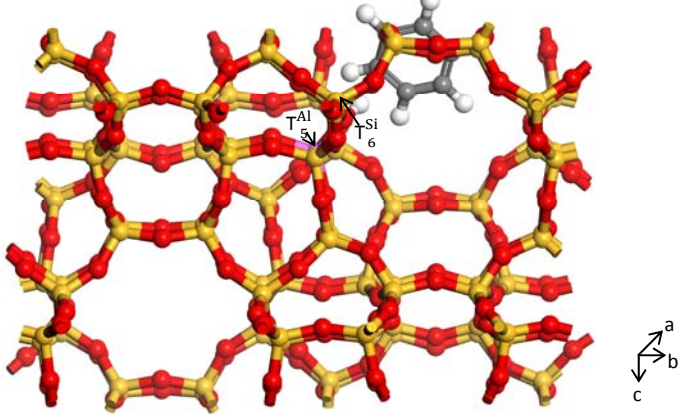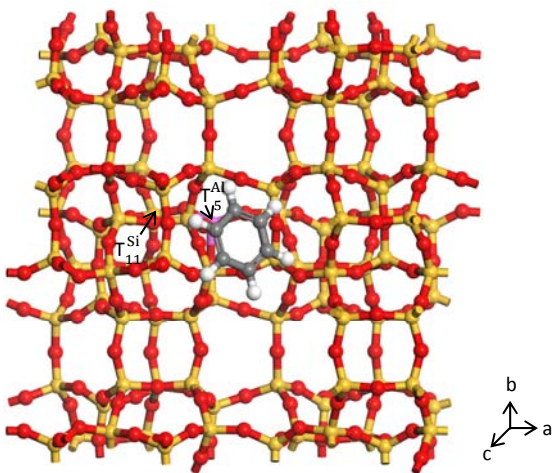

$T_5^{Al}-O^H-T_{11}^{Si}$

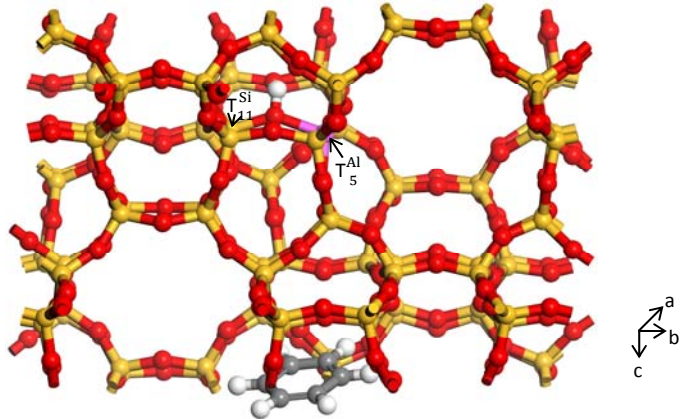

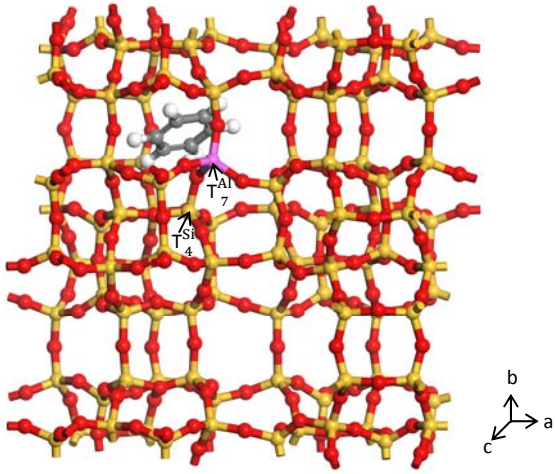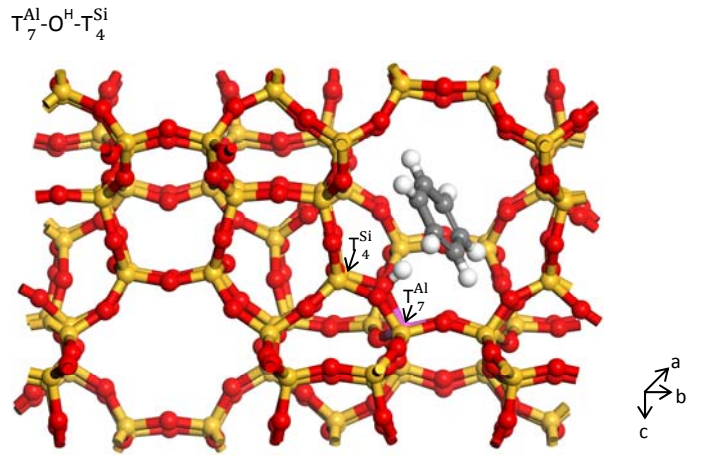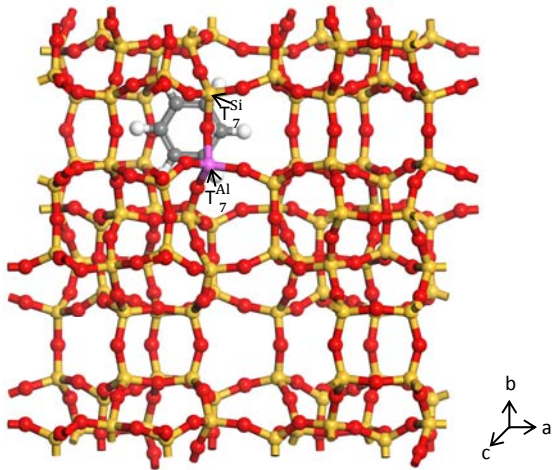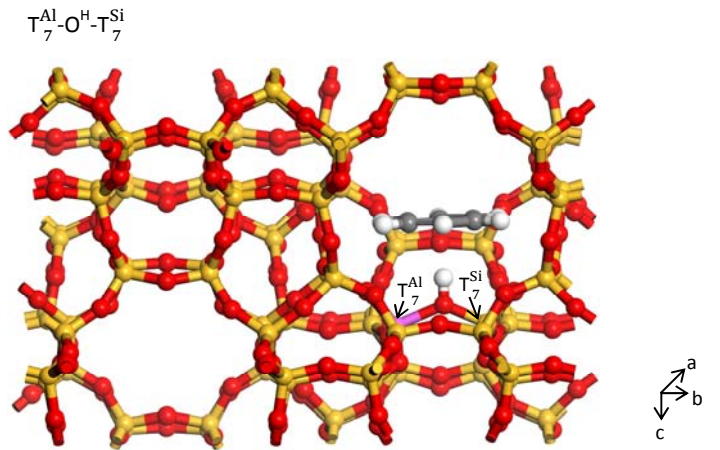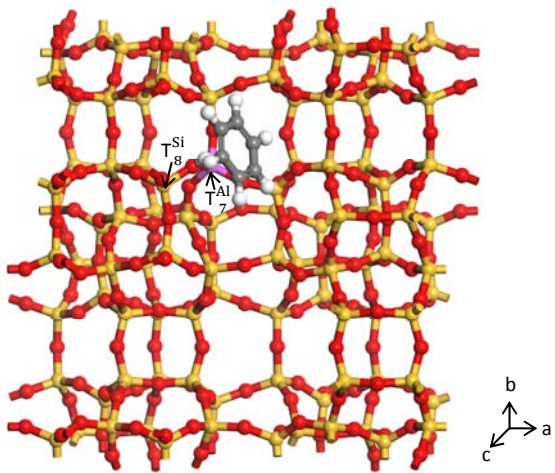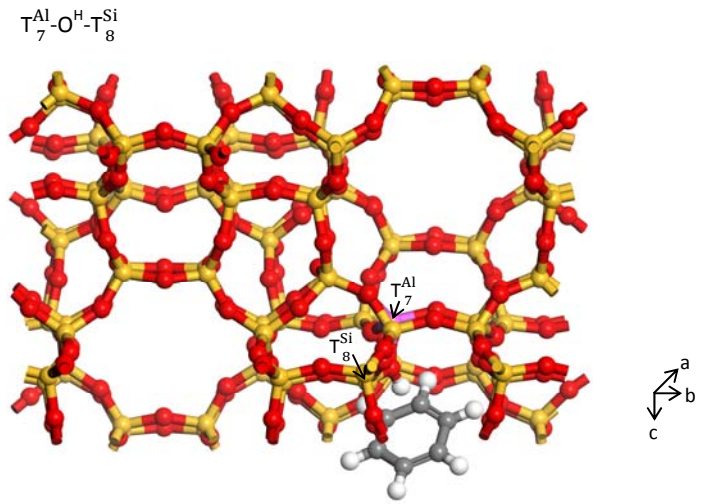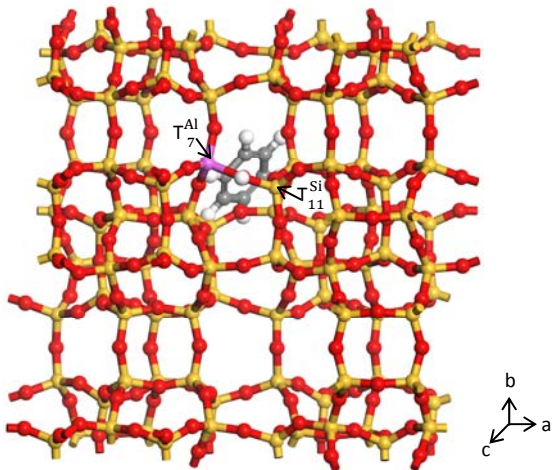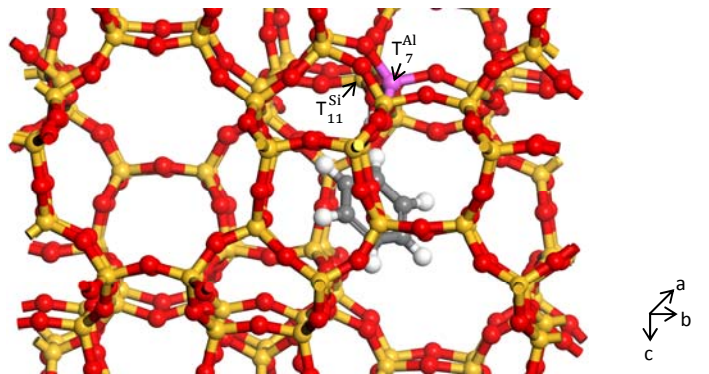

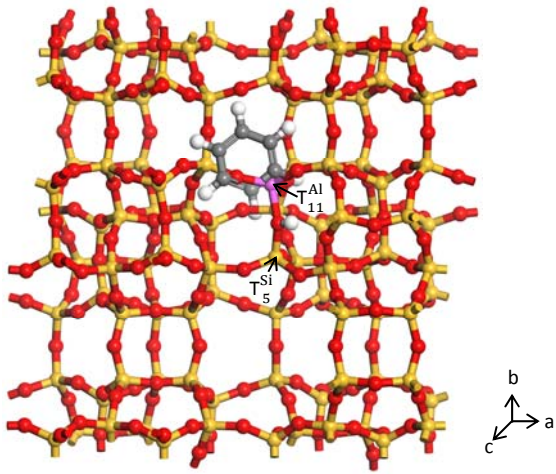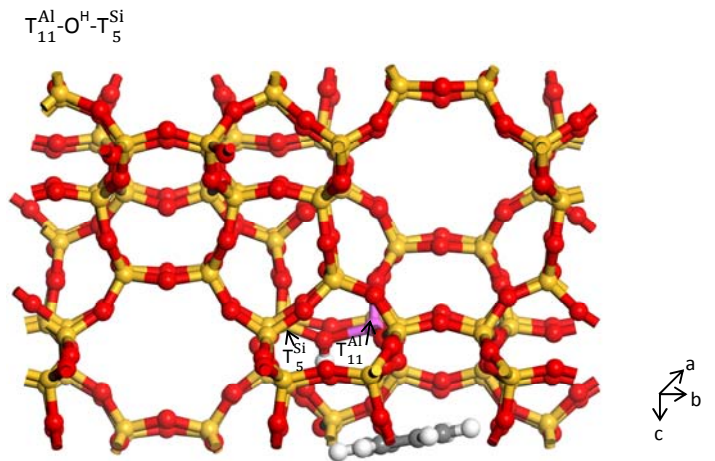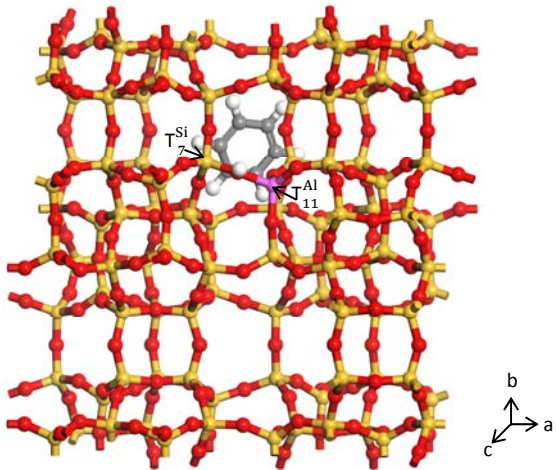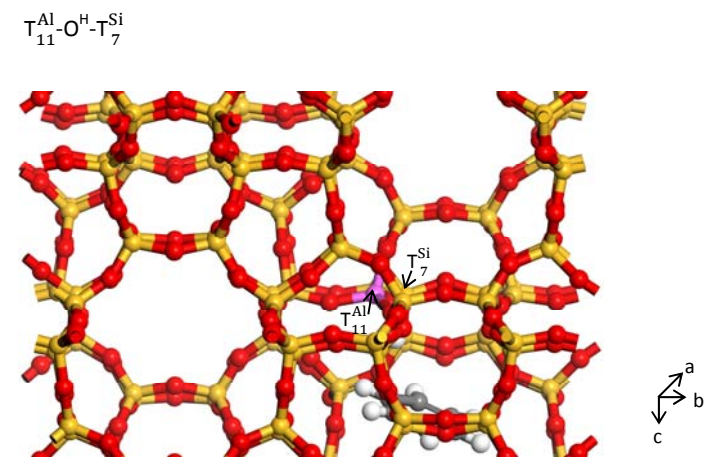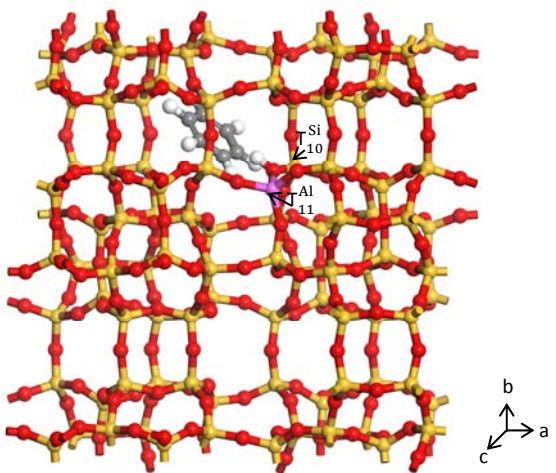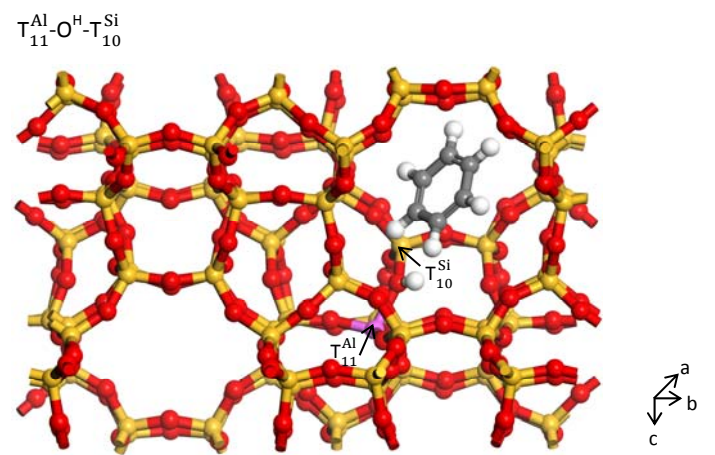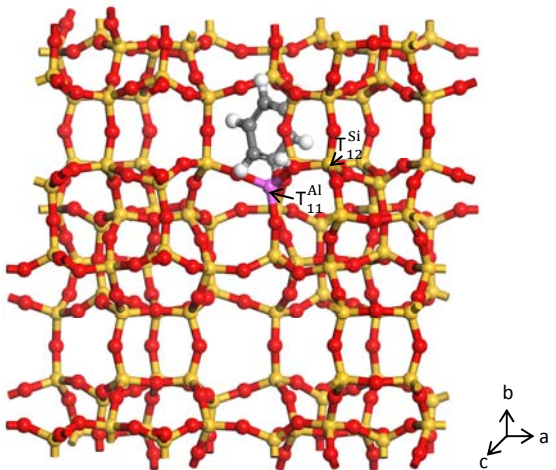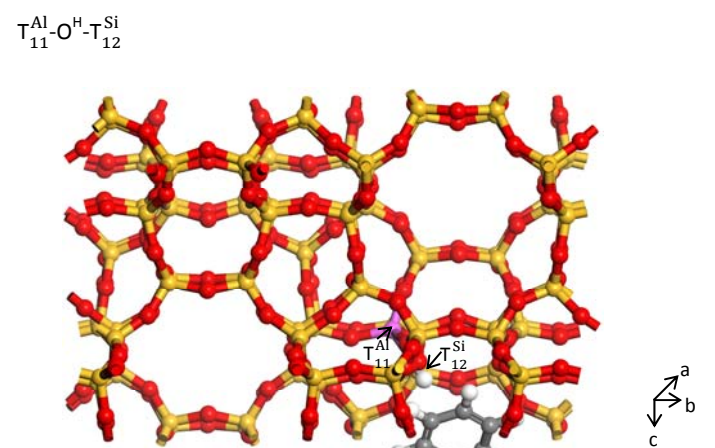

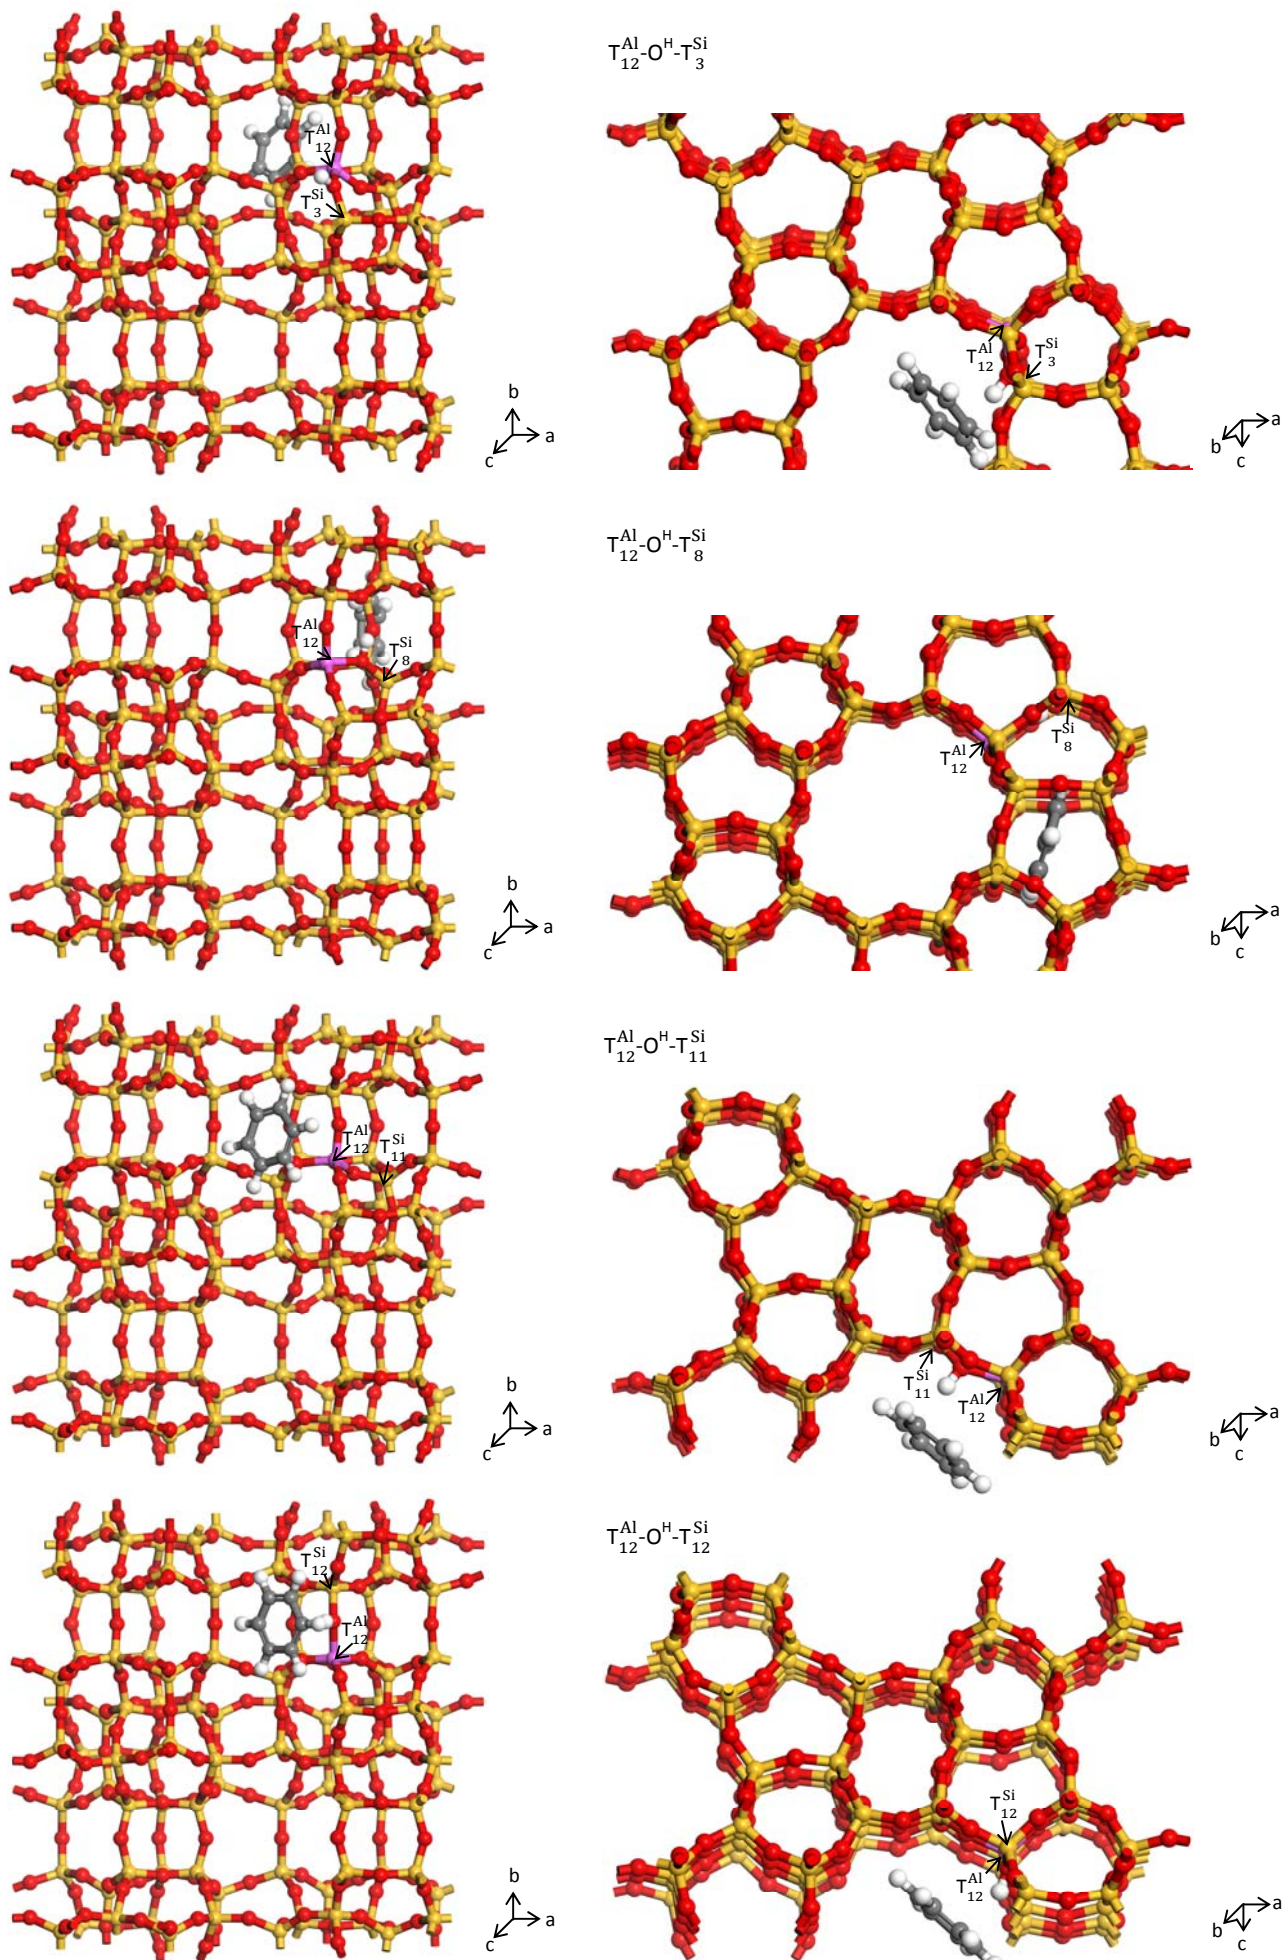

Figure S8 The optimized configurations of benzene adsorption at the acidic sites of the Al substituted T1, T3, T5, T7, T11 and T12 sites in the framework

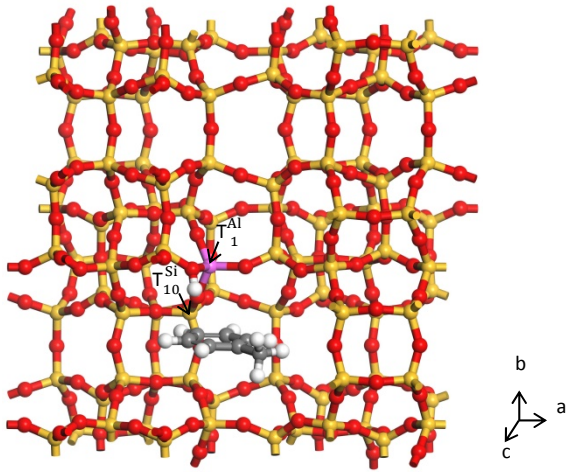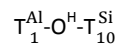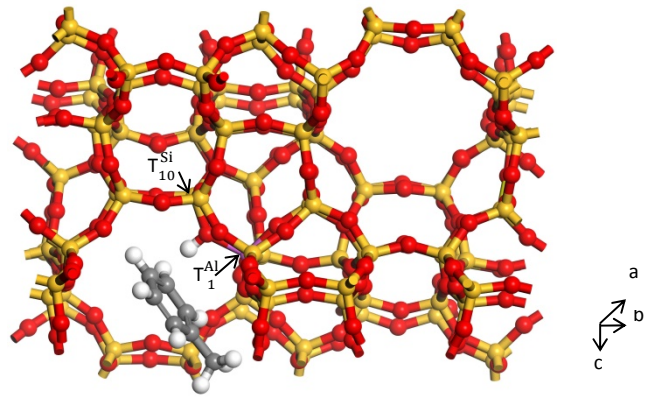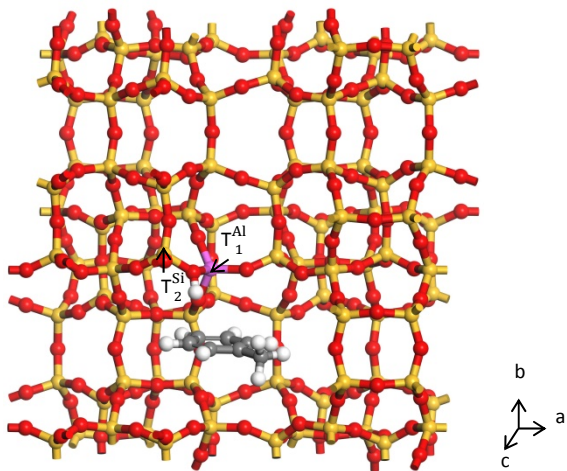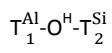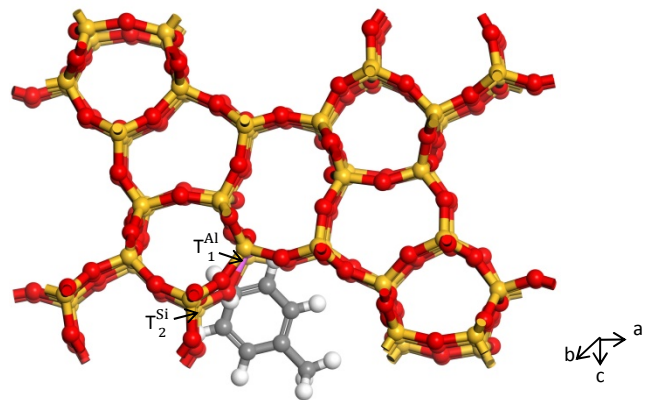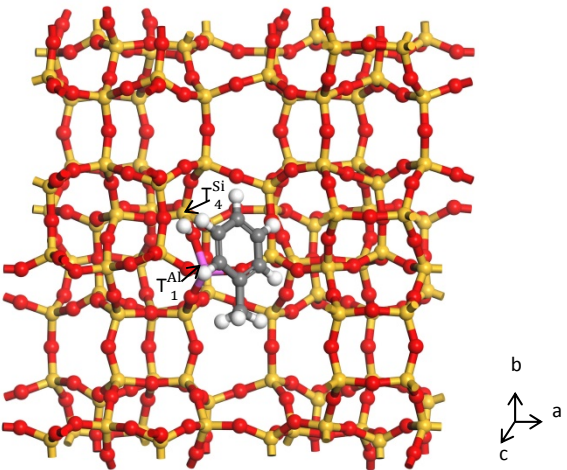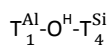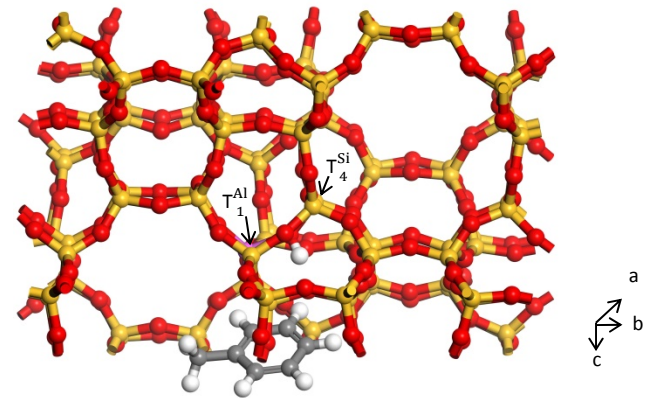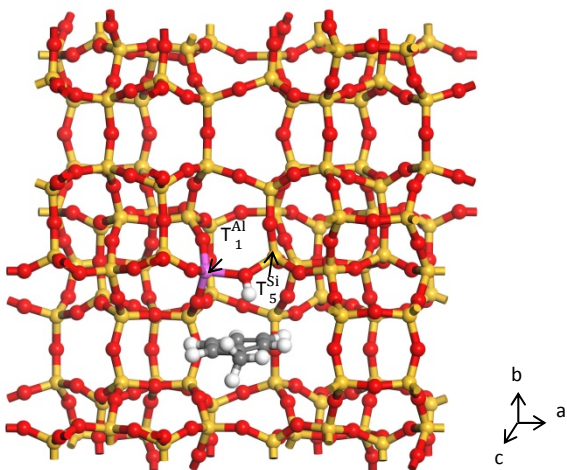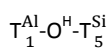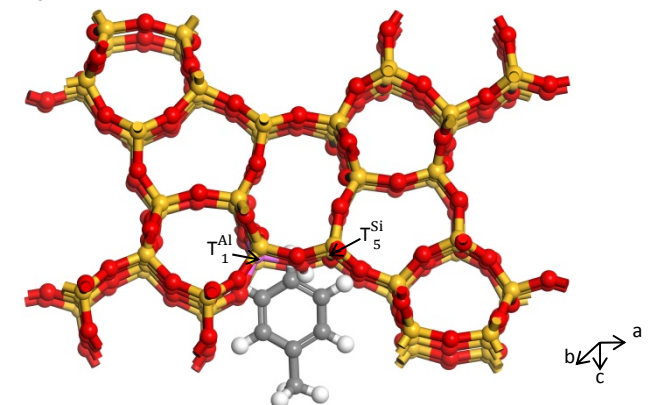

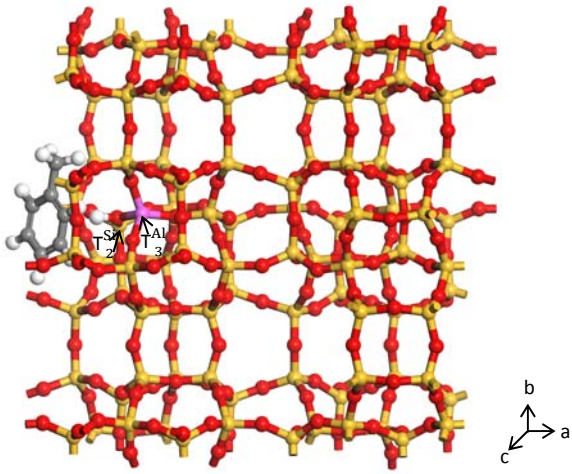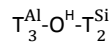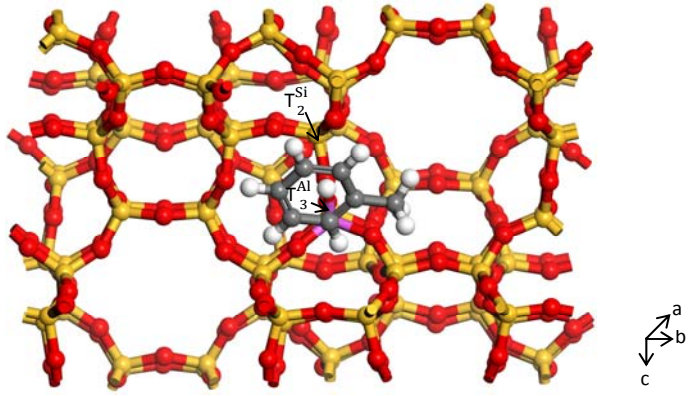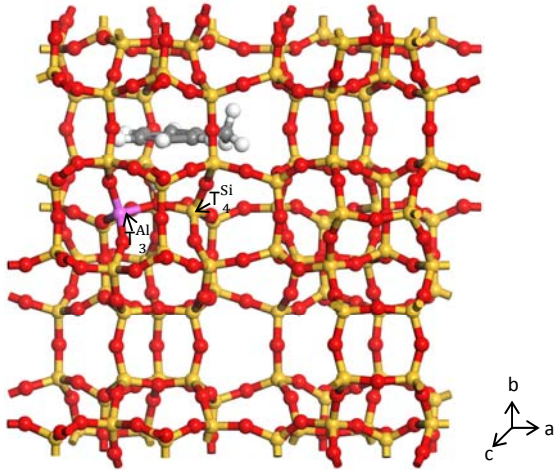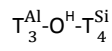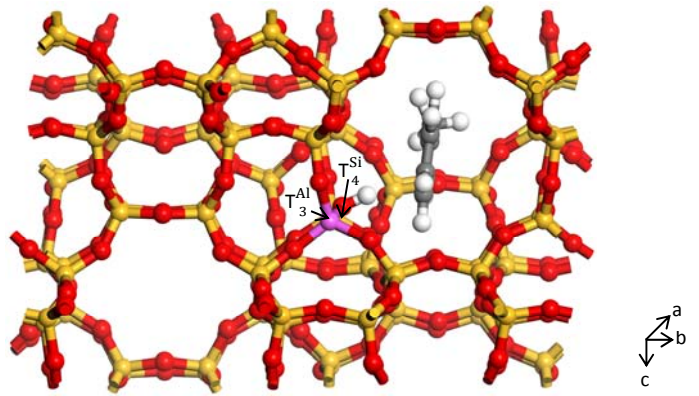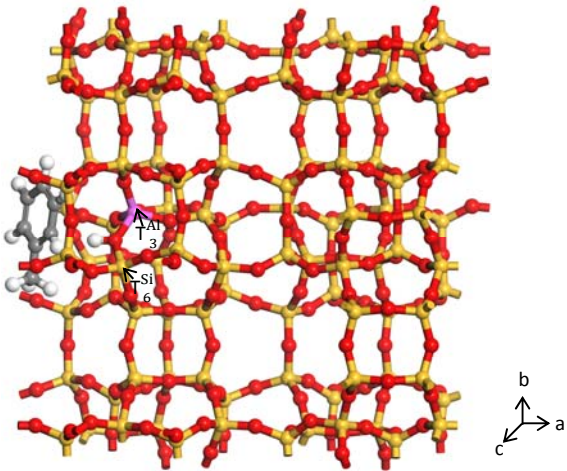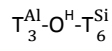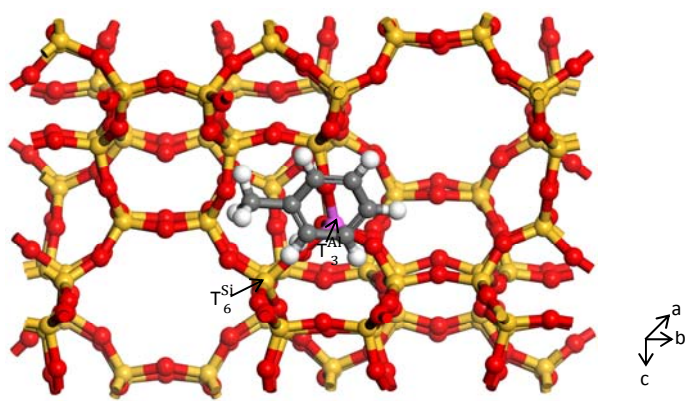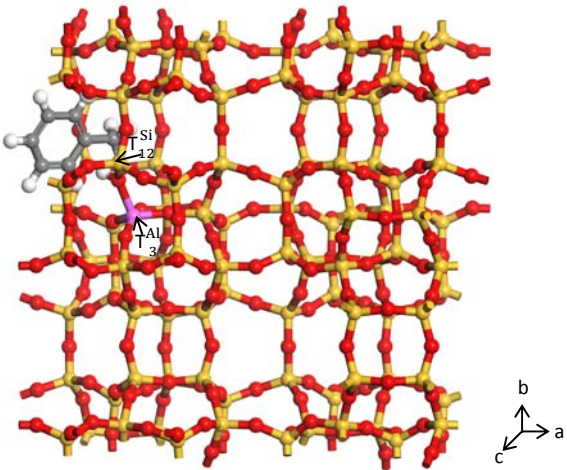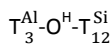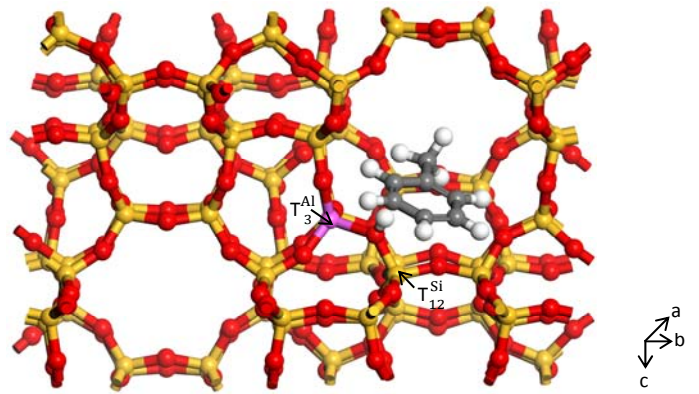

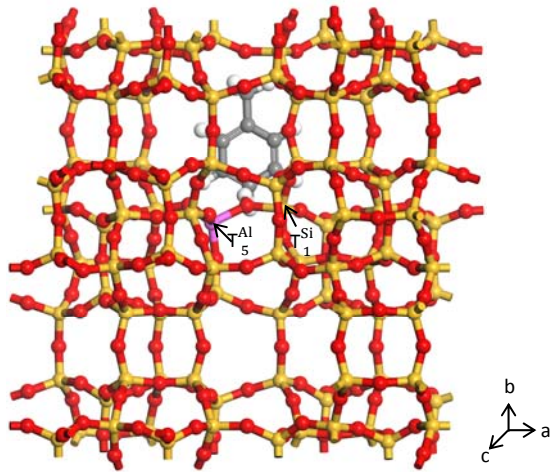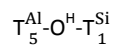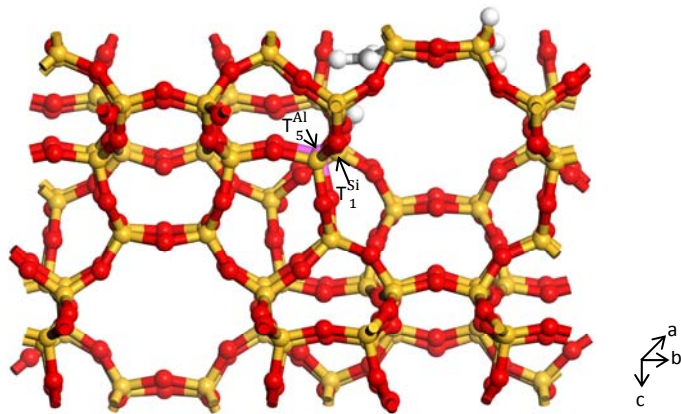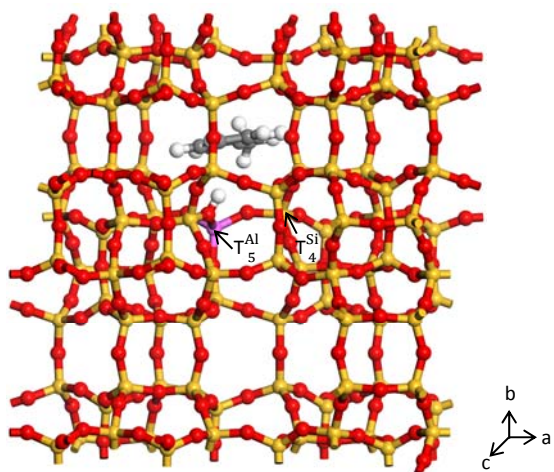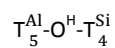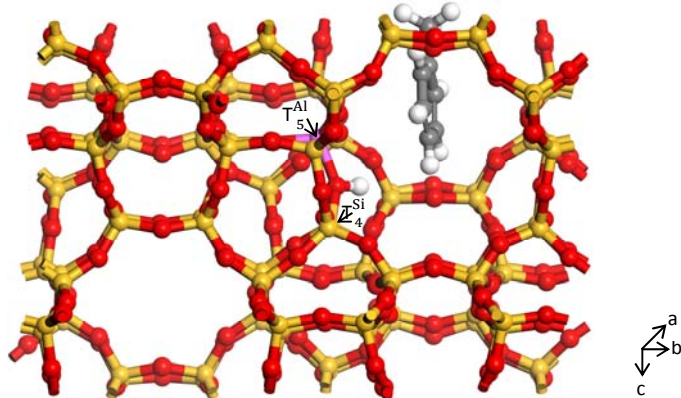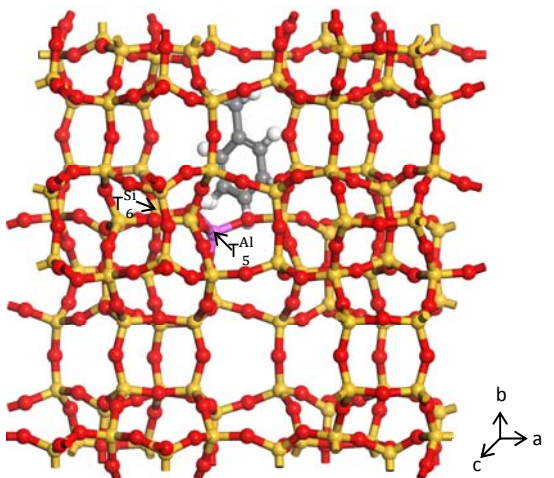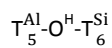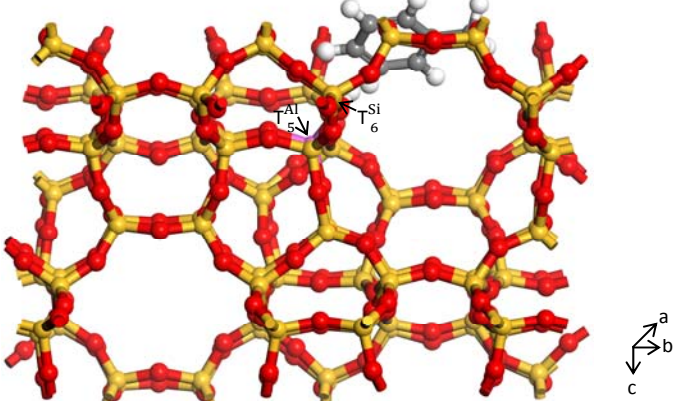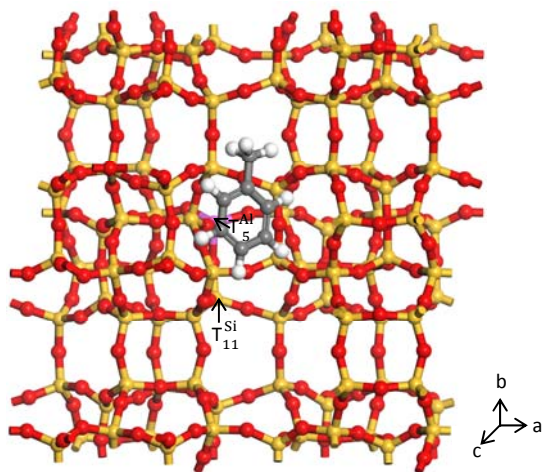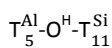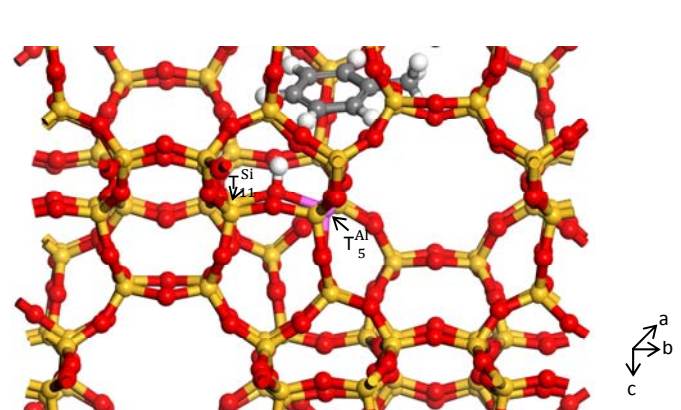



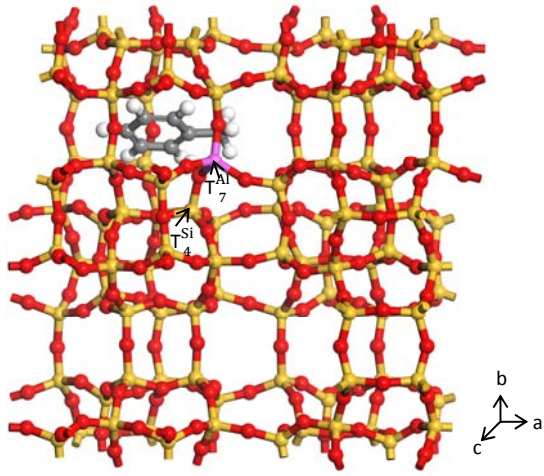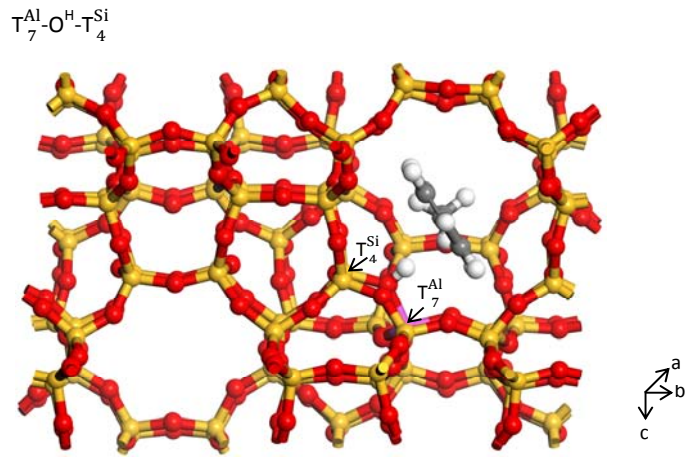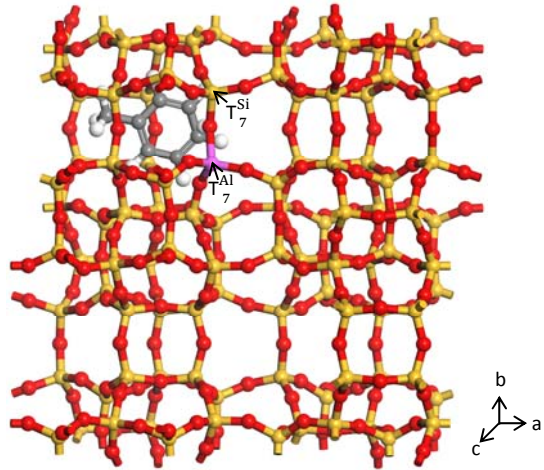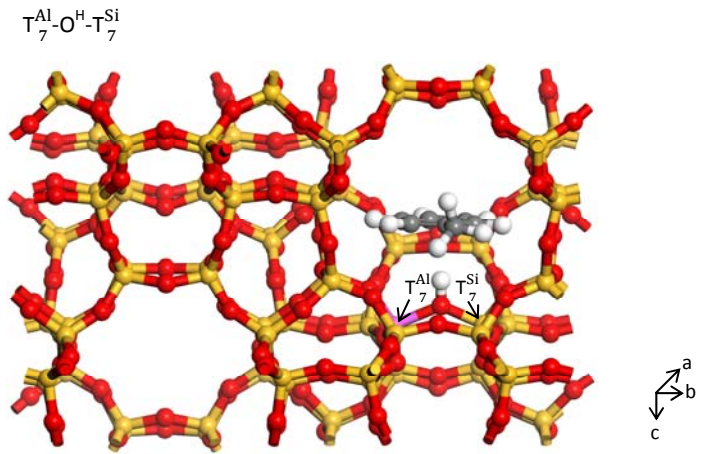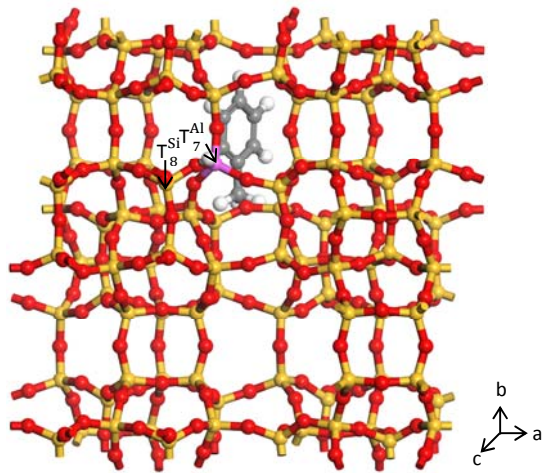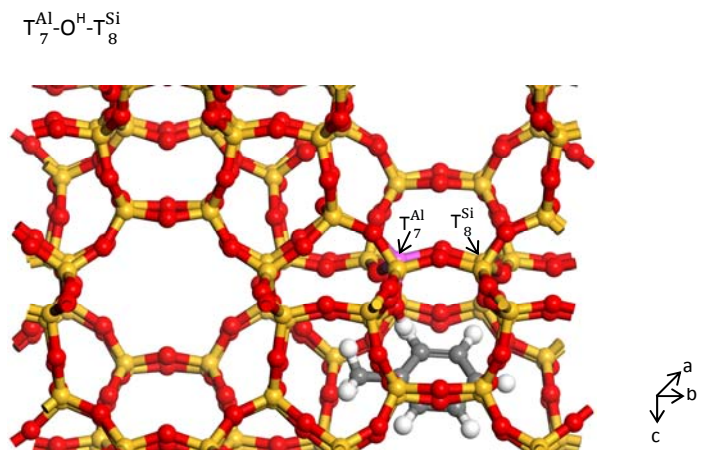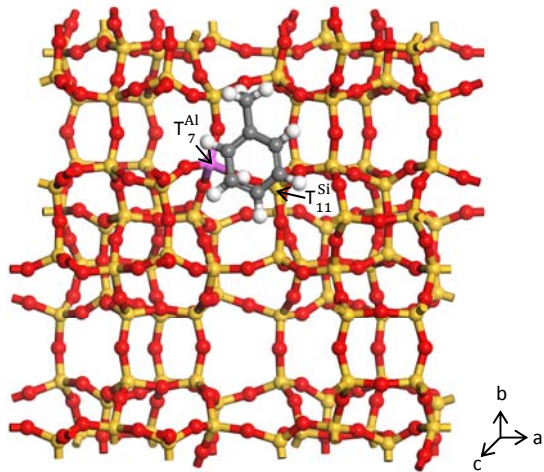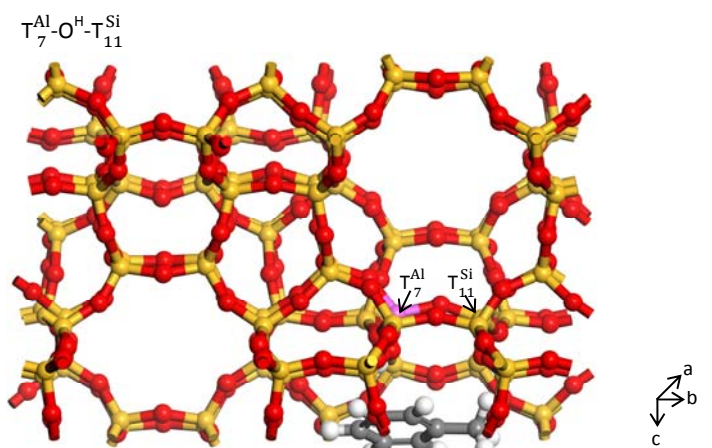

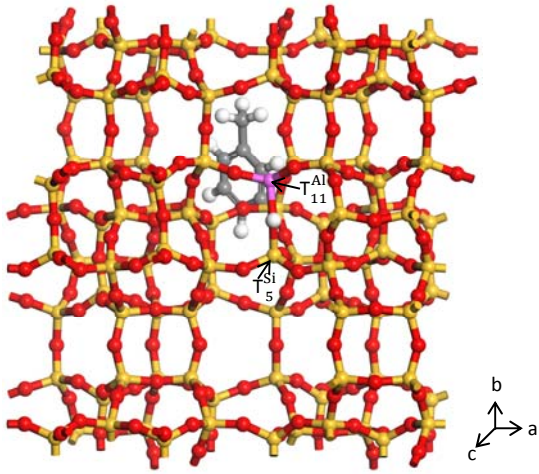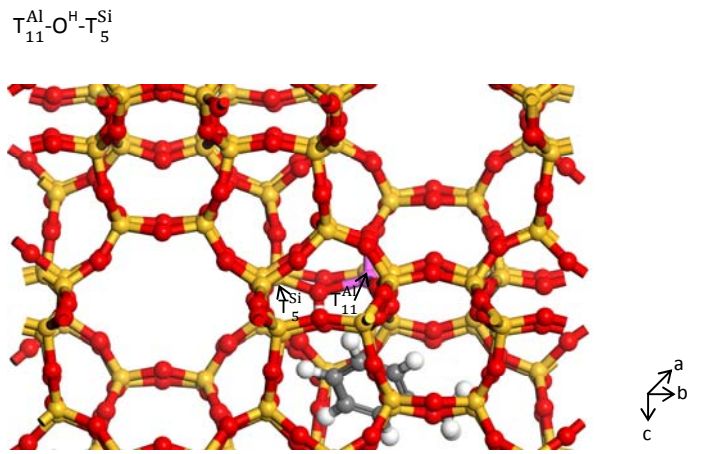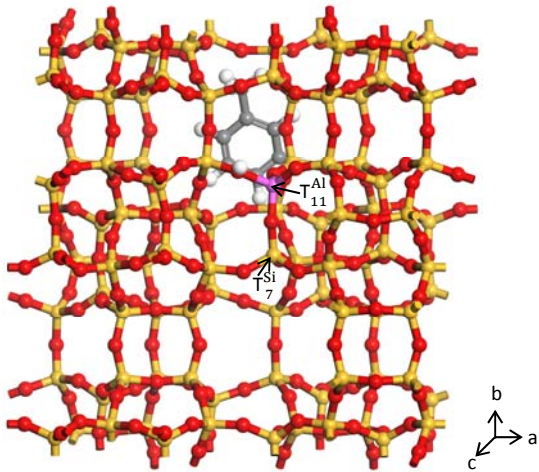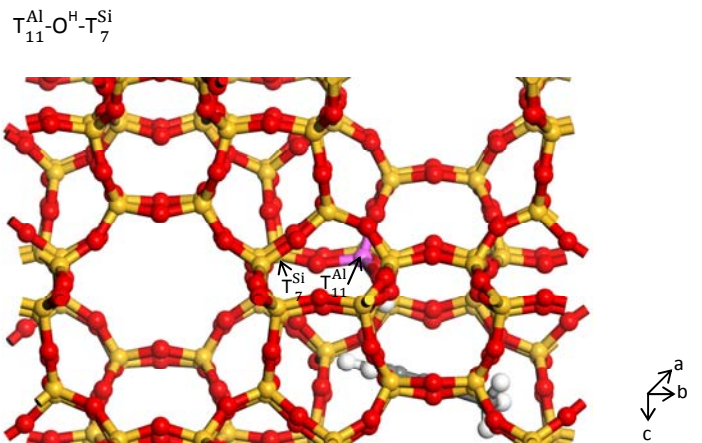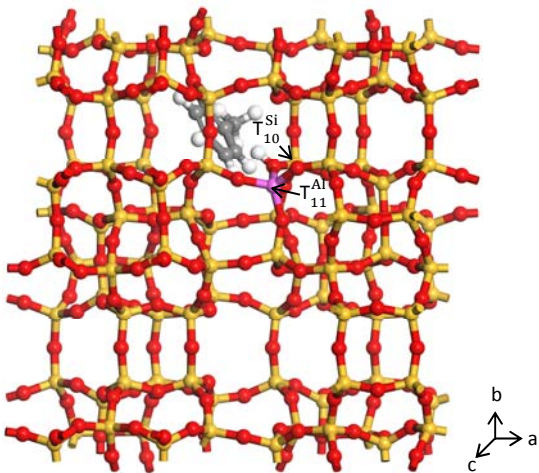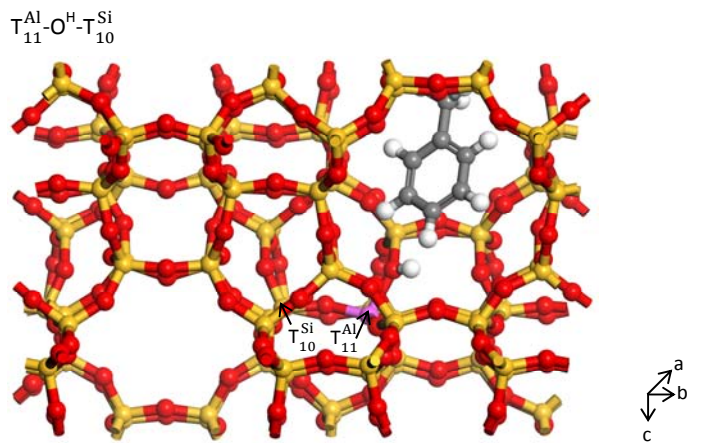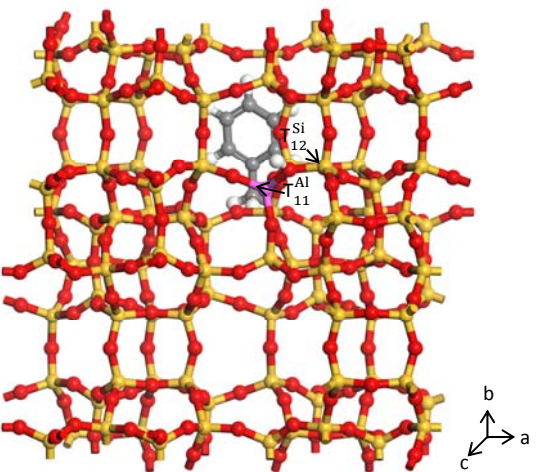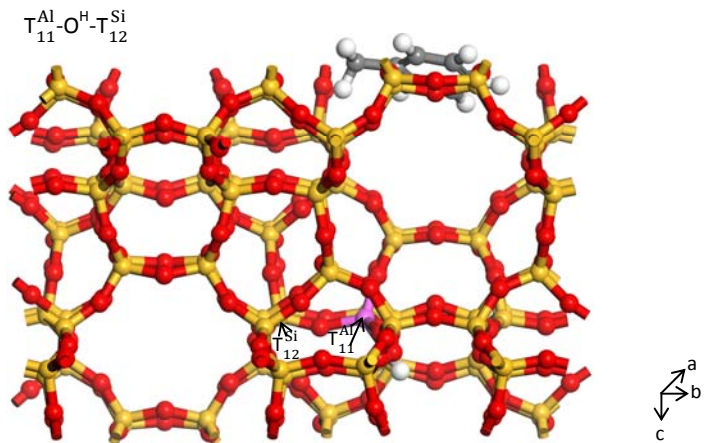

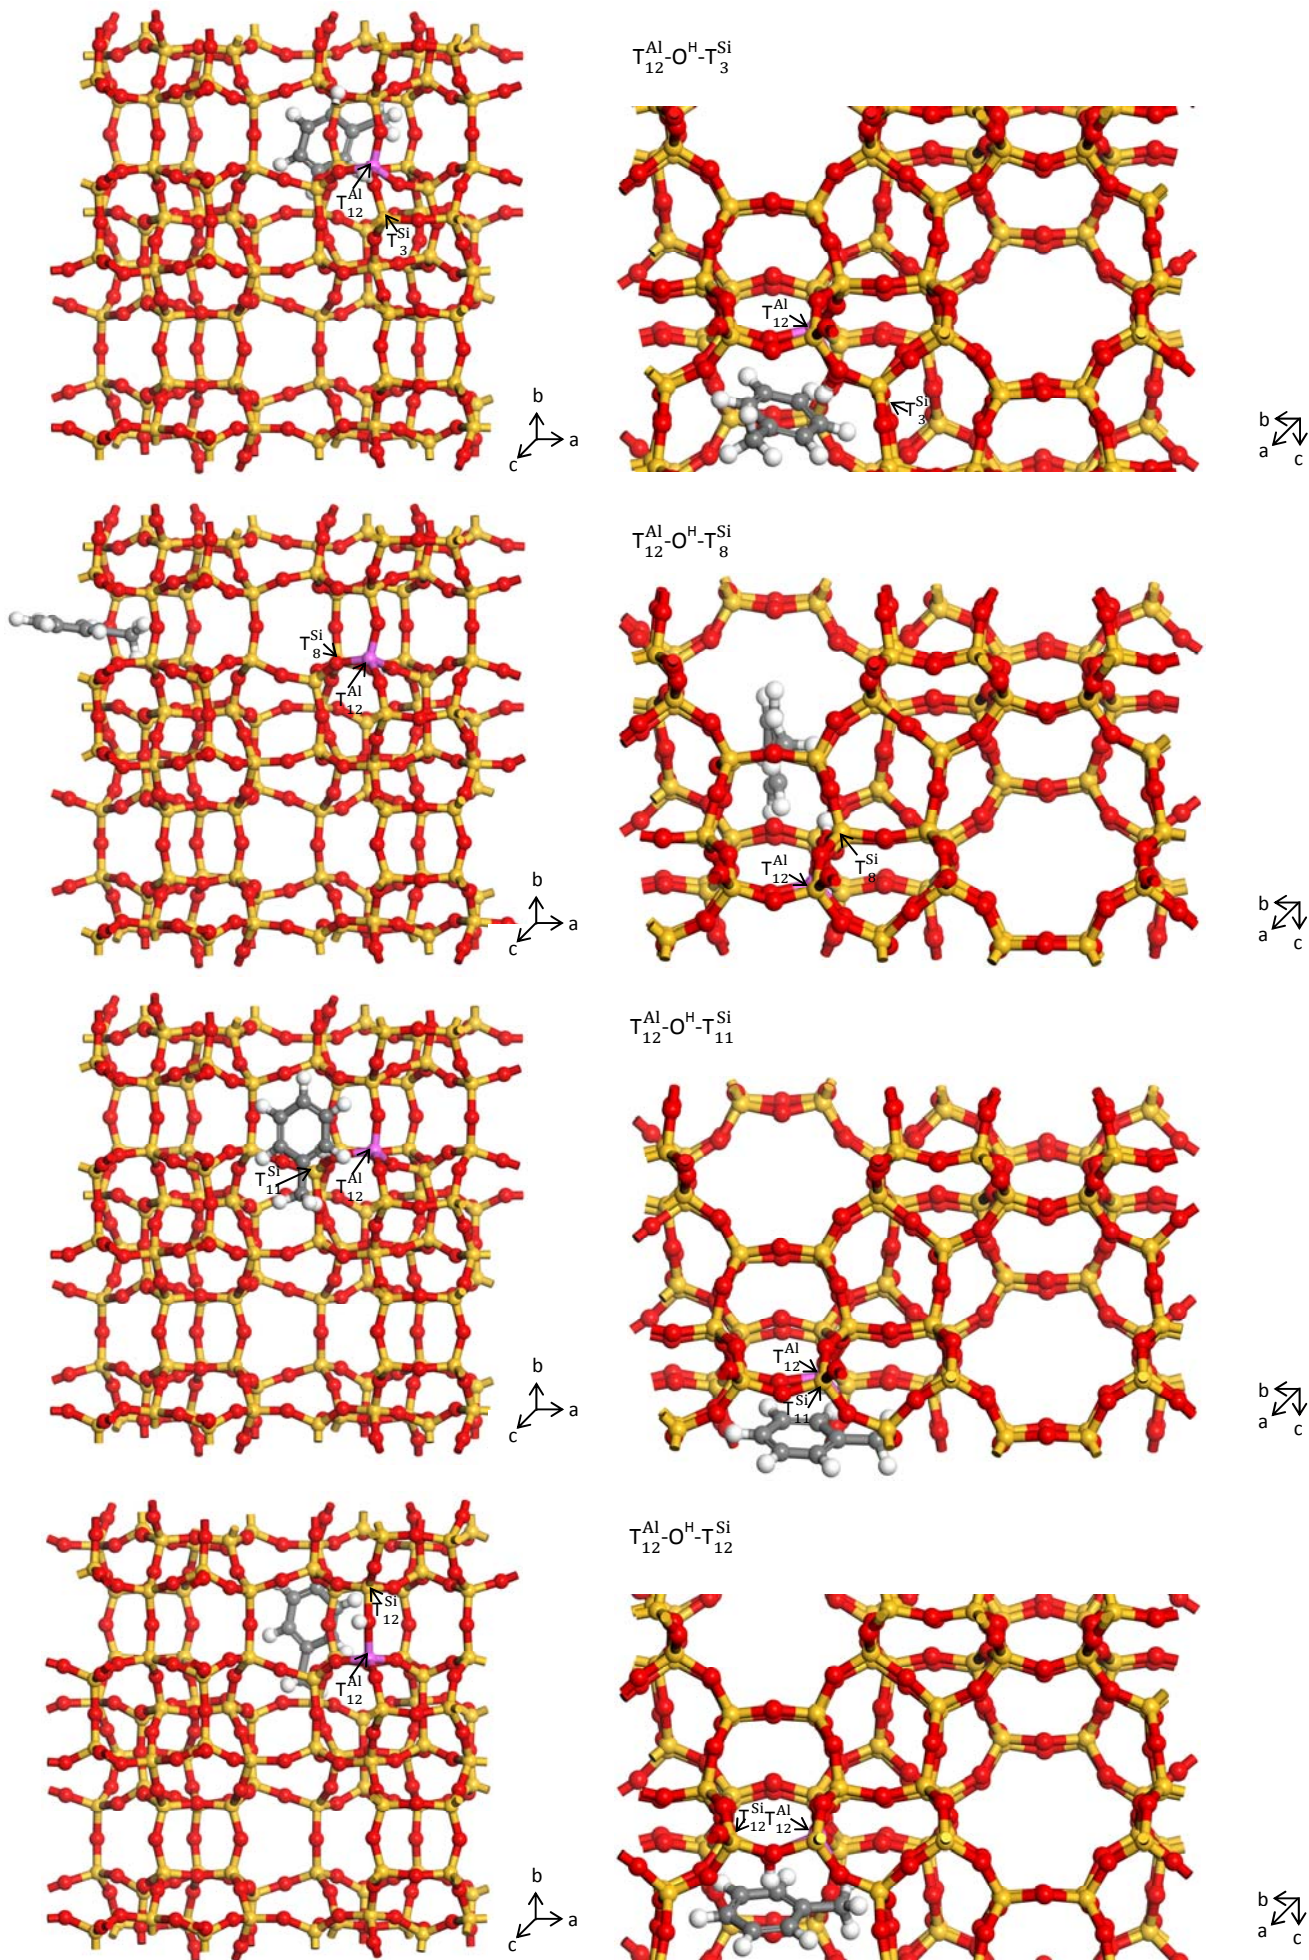

Figure S9 The optimized configurations of toluene adsorption at the acidic sites of the Al substituted T1, T3, T5, T7, T11 and T12 sites in the framework

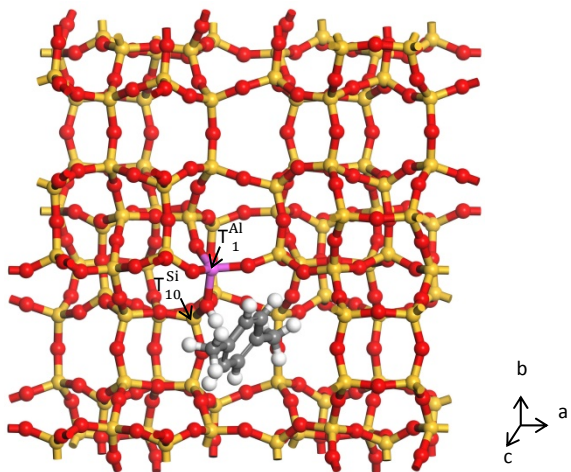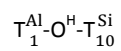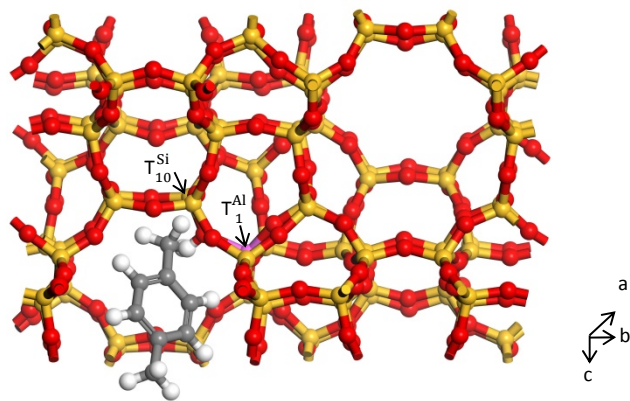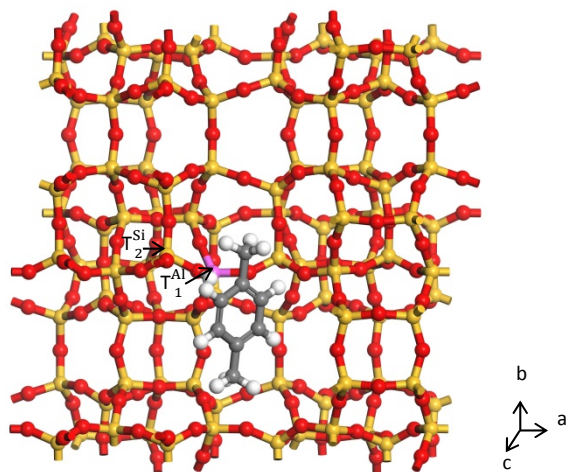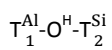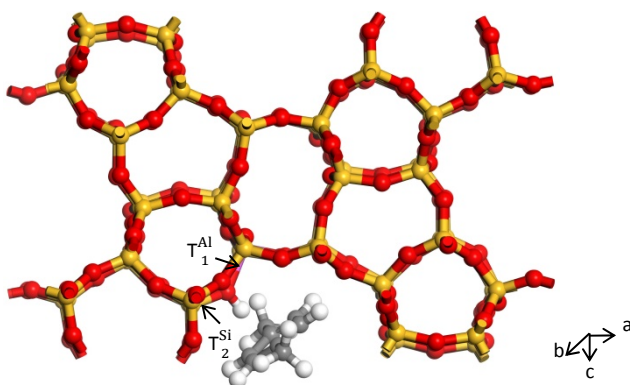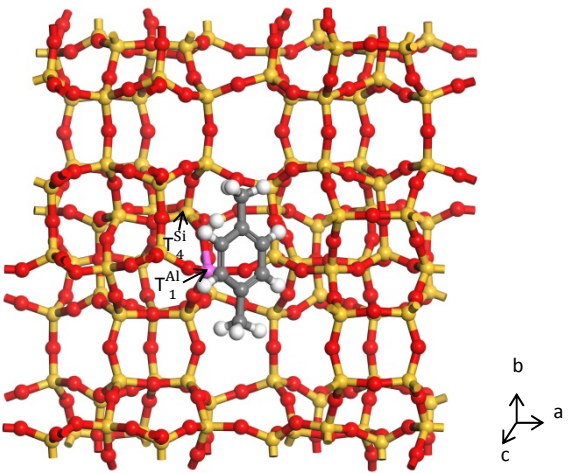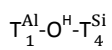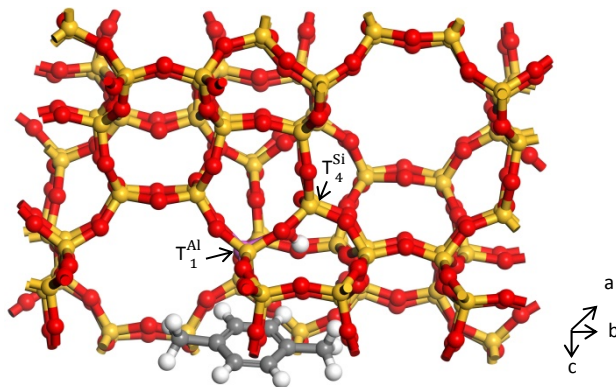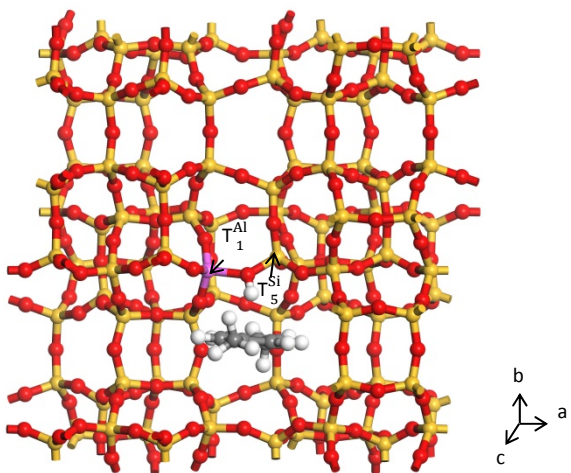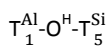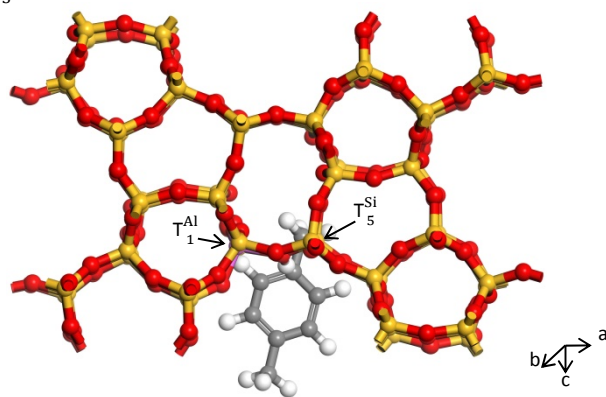

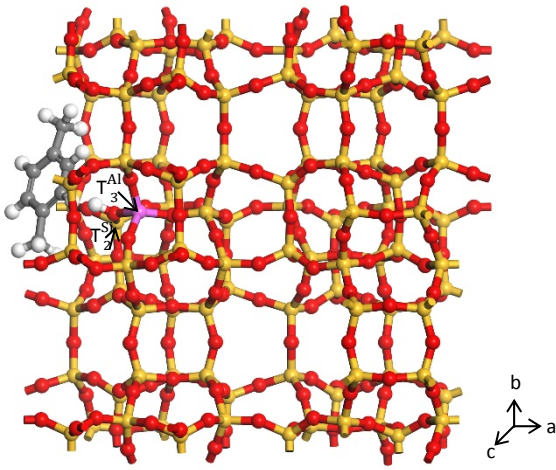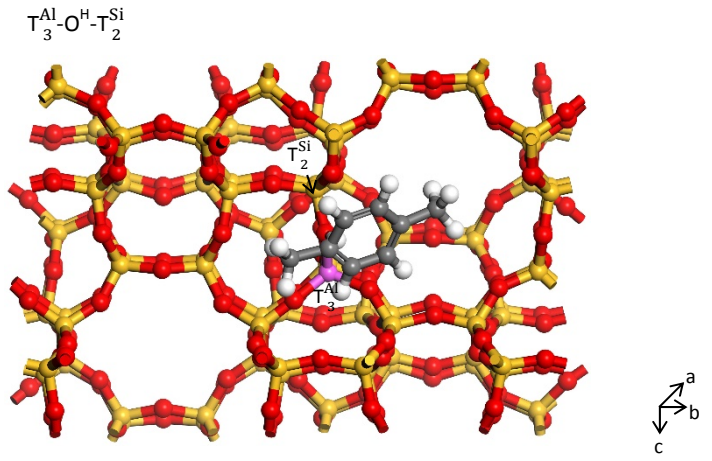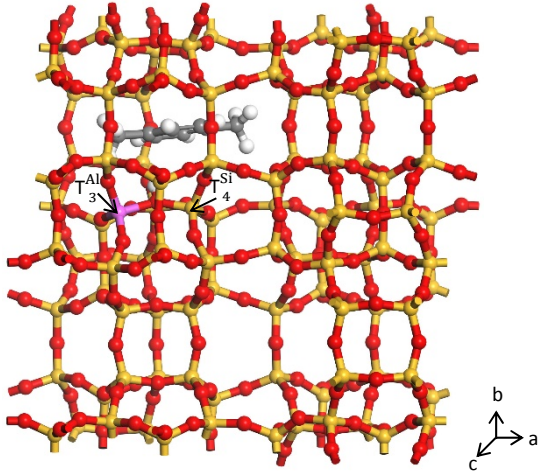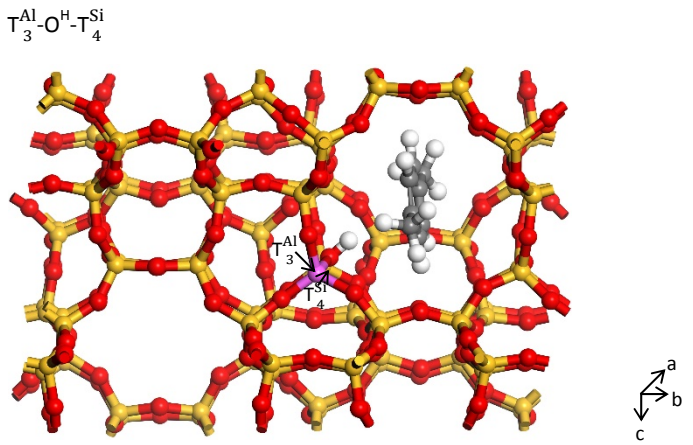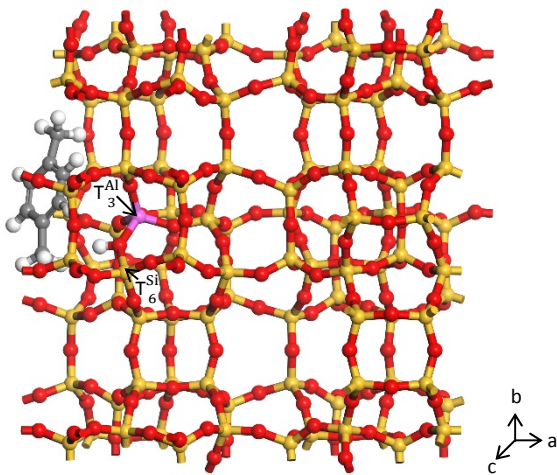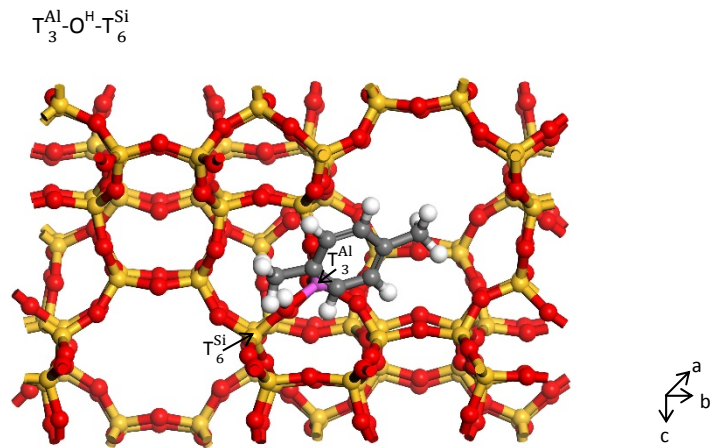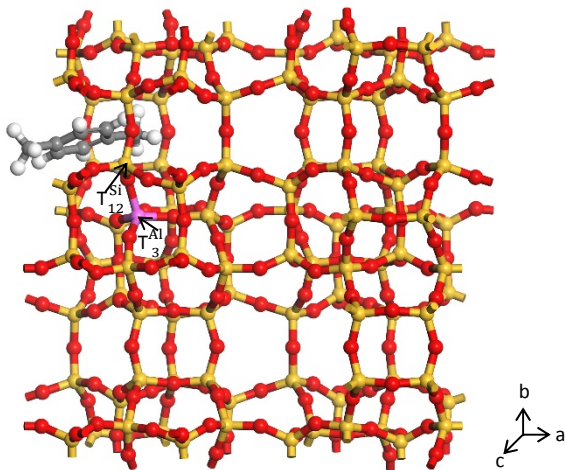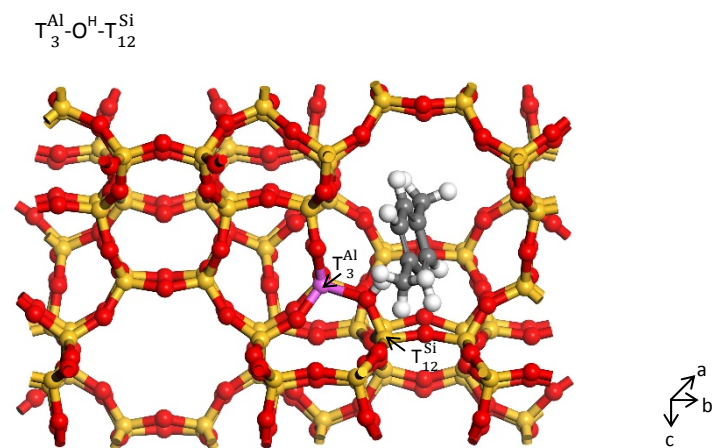

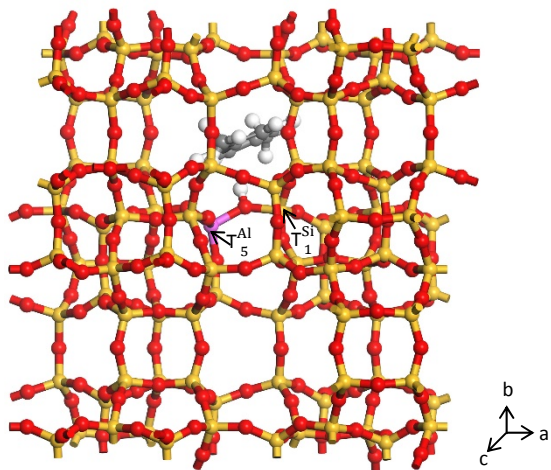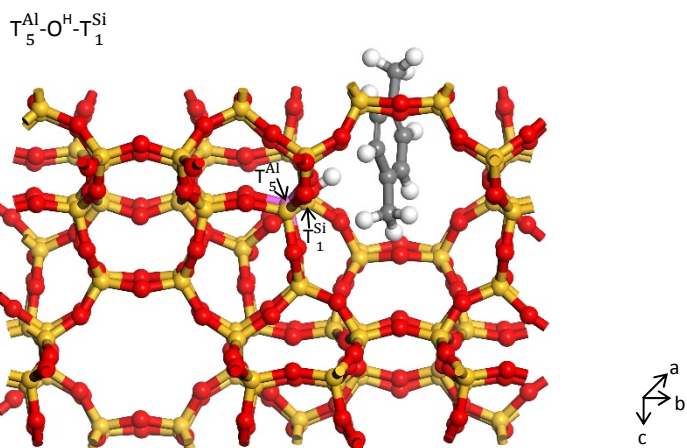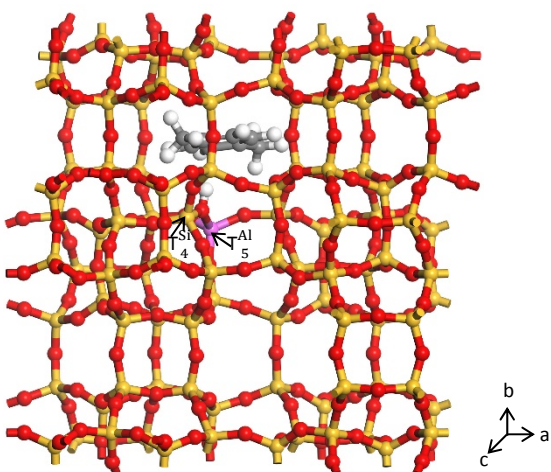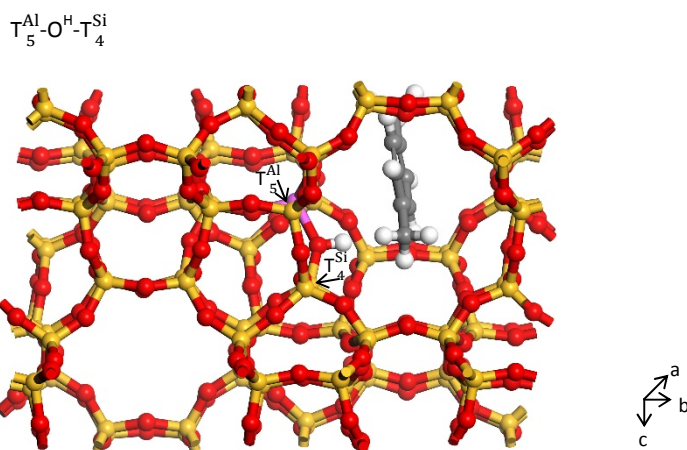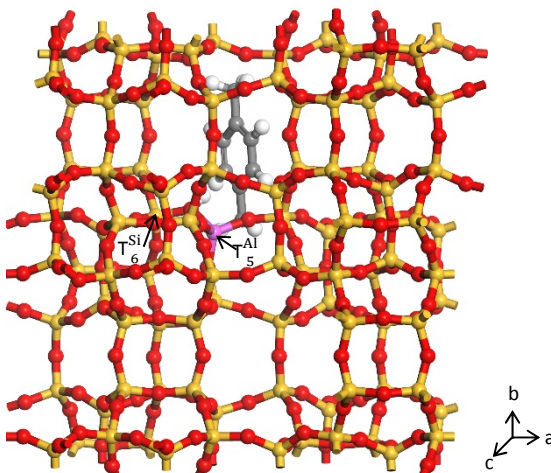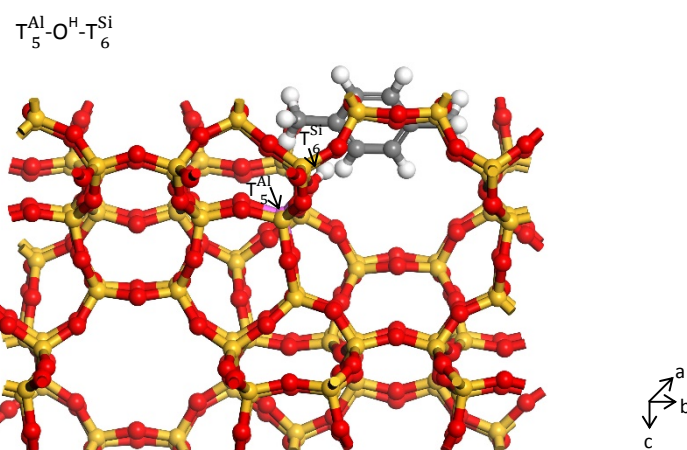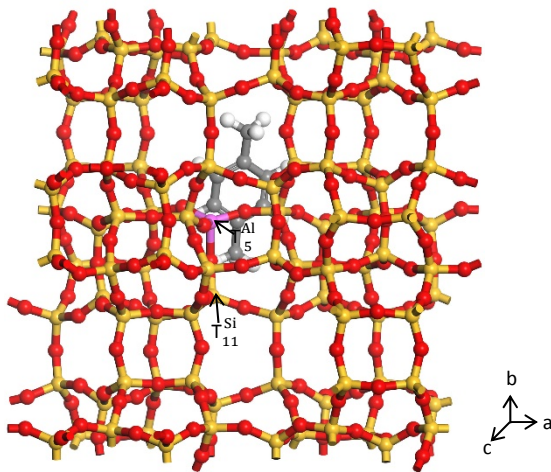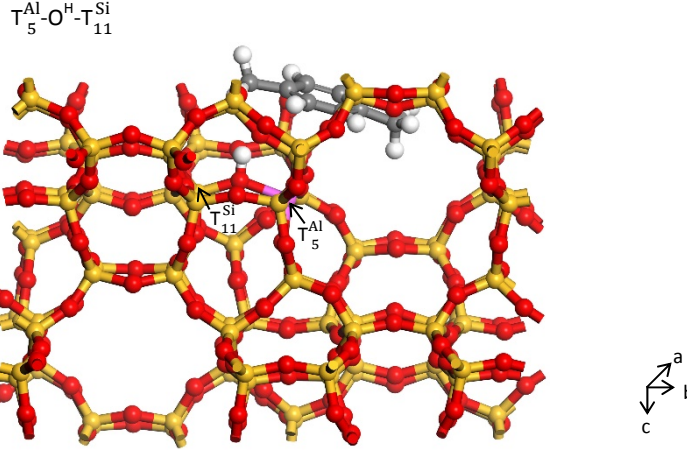

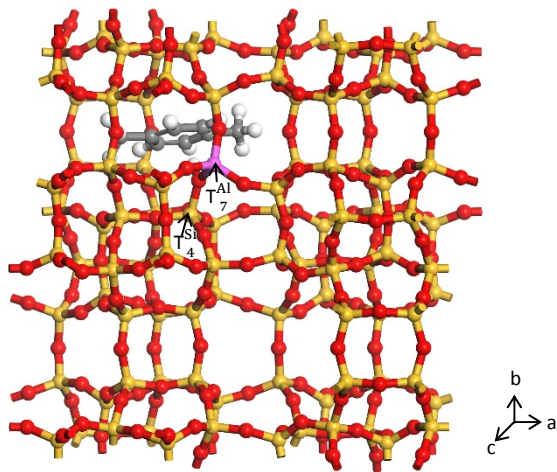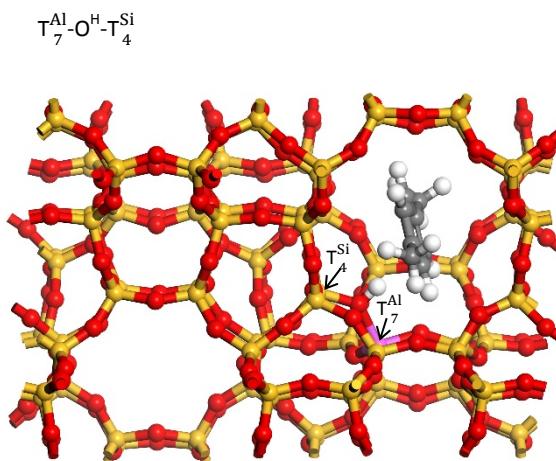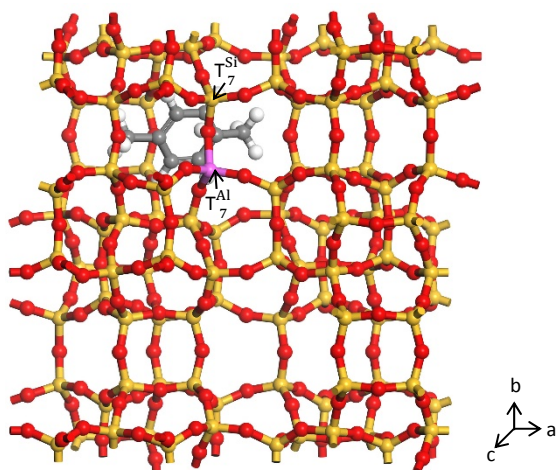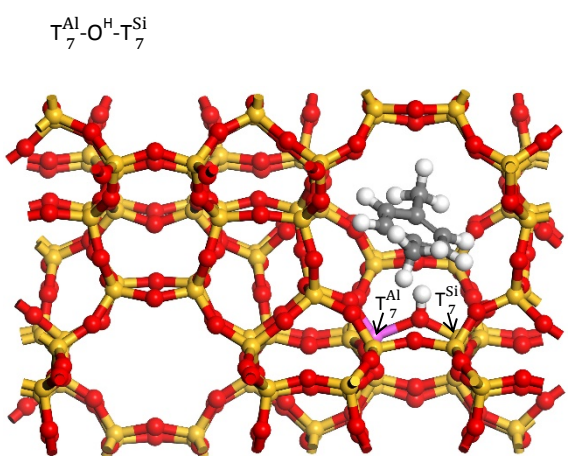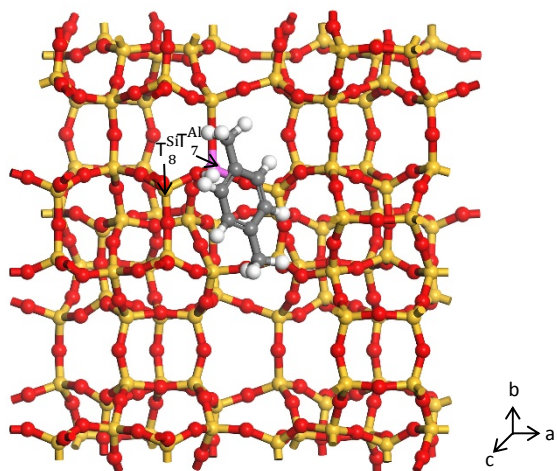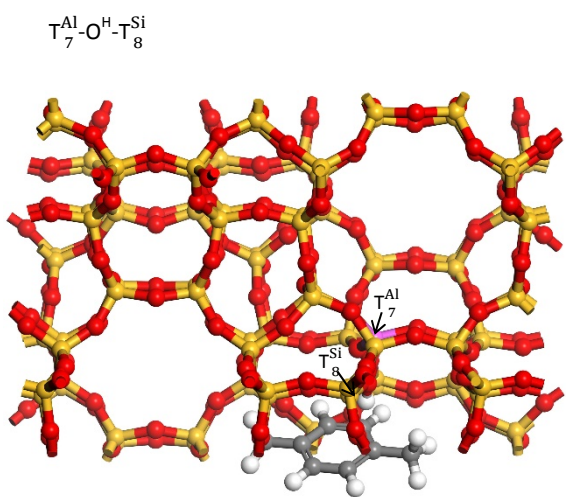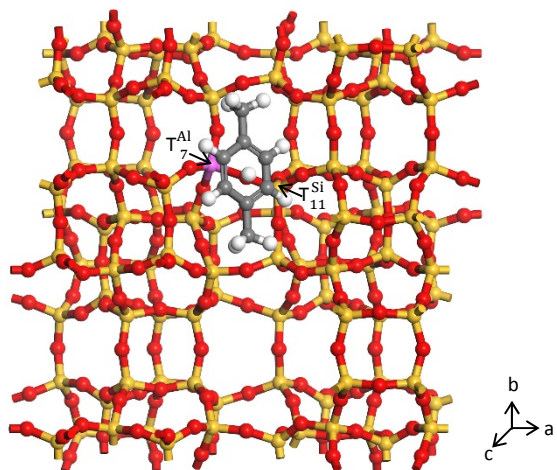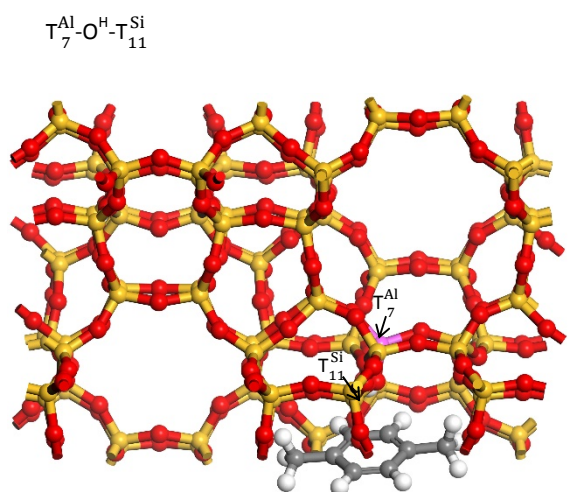

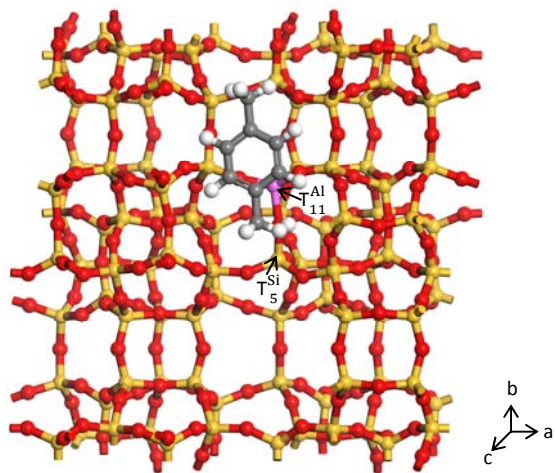

$T_{11}^{Al}-O^H-T_5^{Si}$

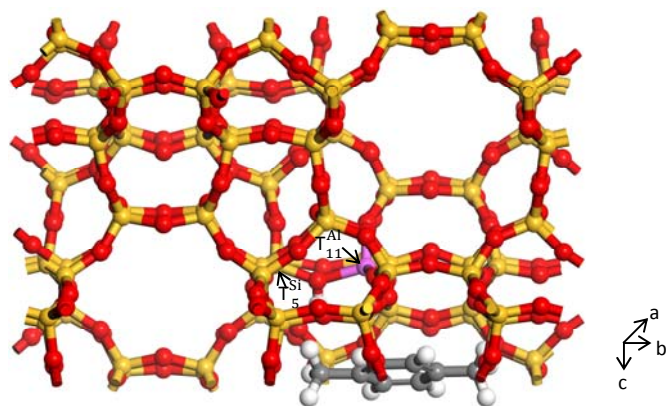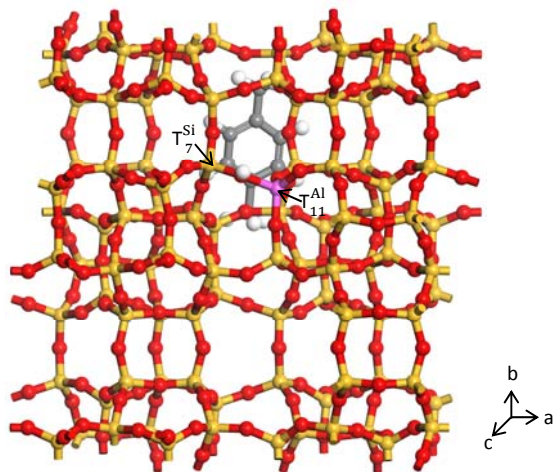

$T_{11}^{Al}-O^H-T_7^{Si}$

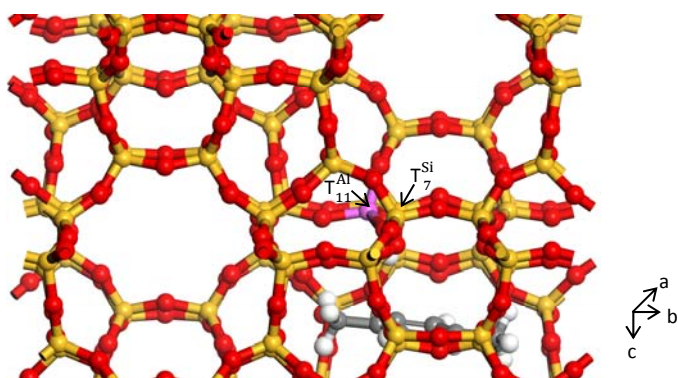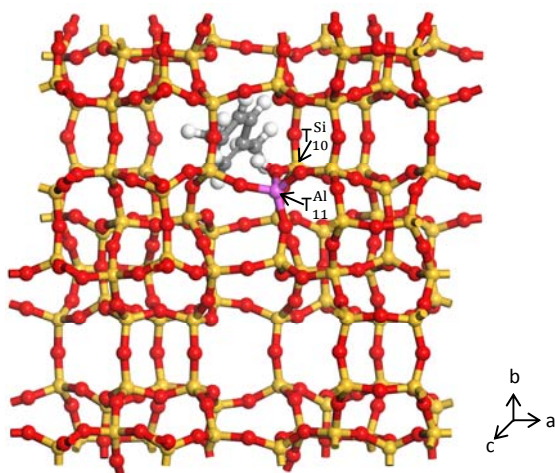

$T_{11}^{Al}-O^H-T_{10}^{Si}$

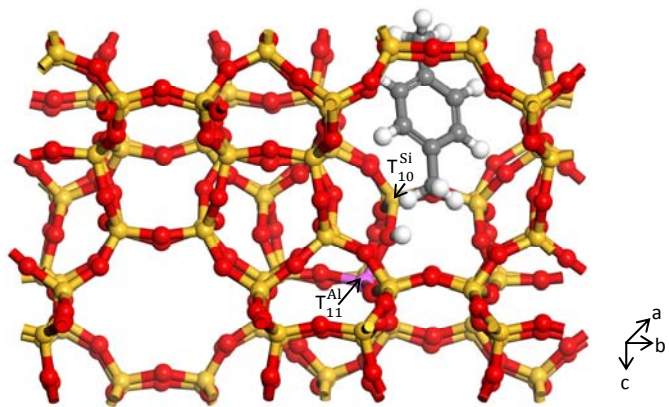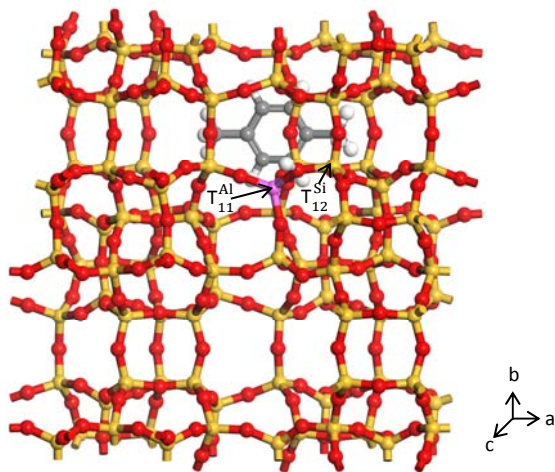

$T_{11}^{Al}-O^H-T_{12}^{Si}$

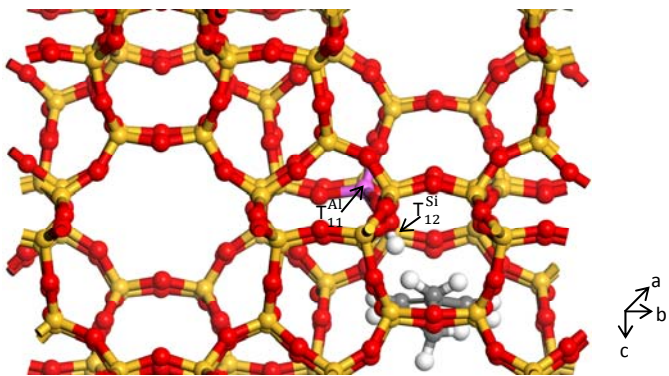



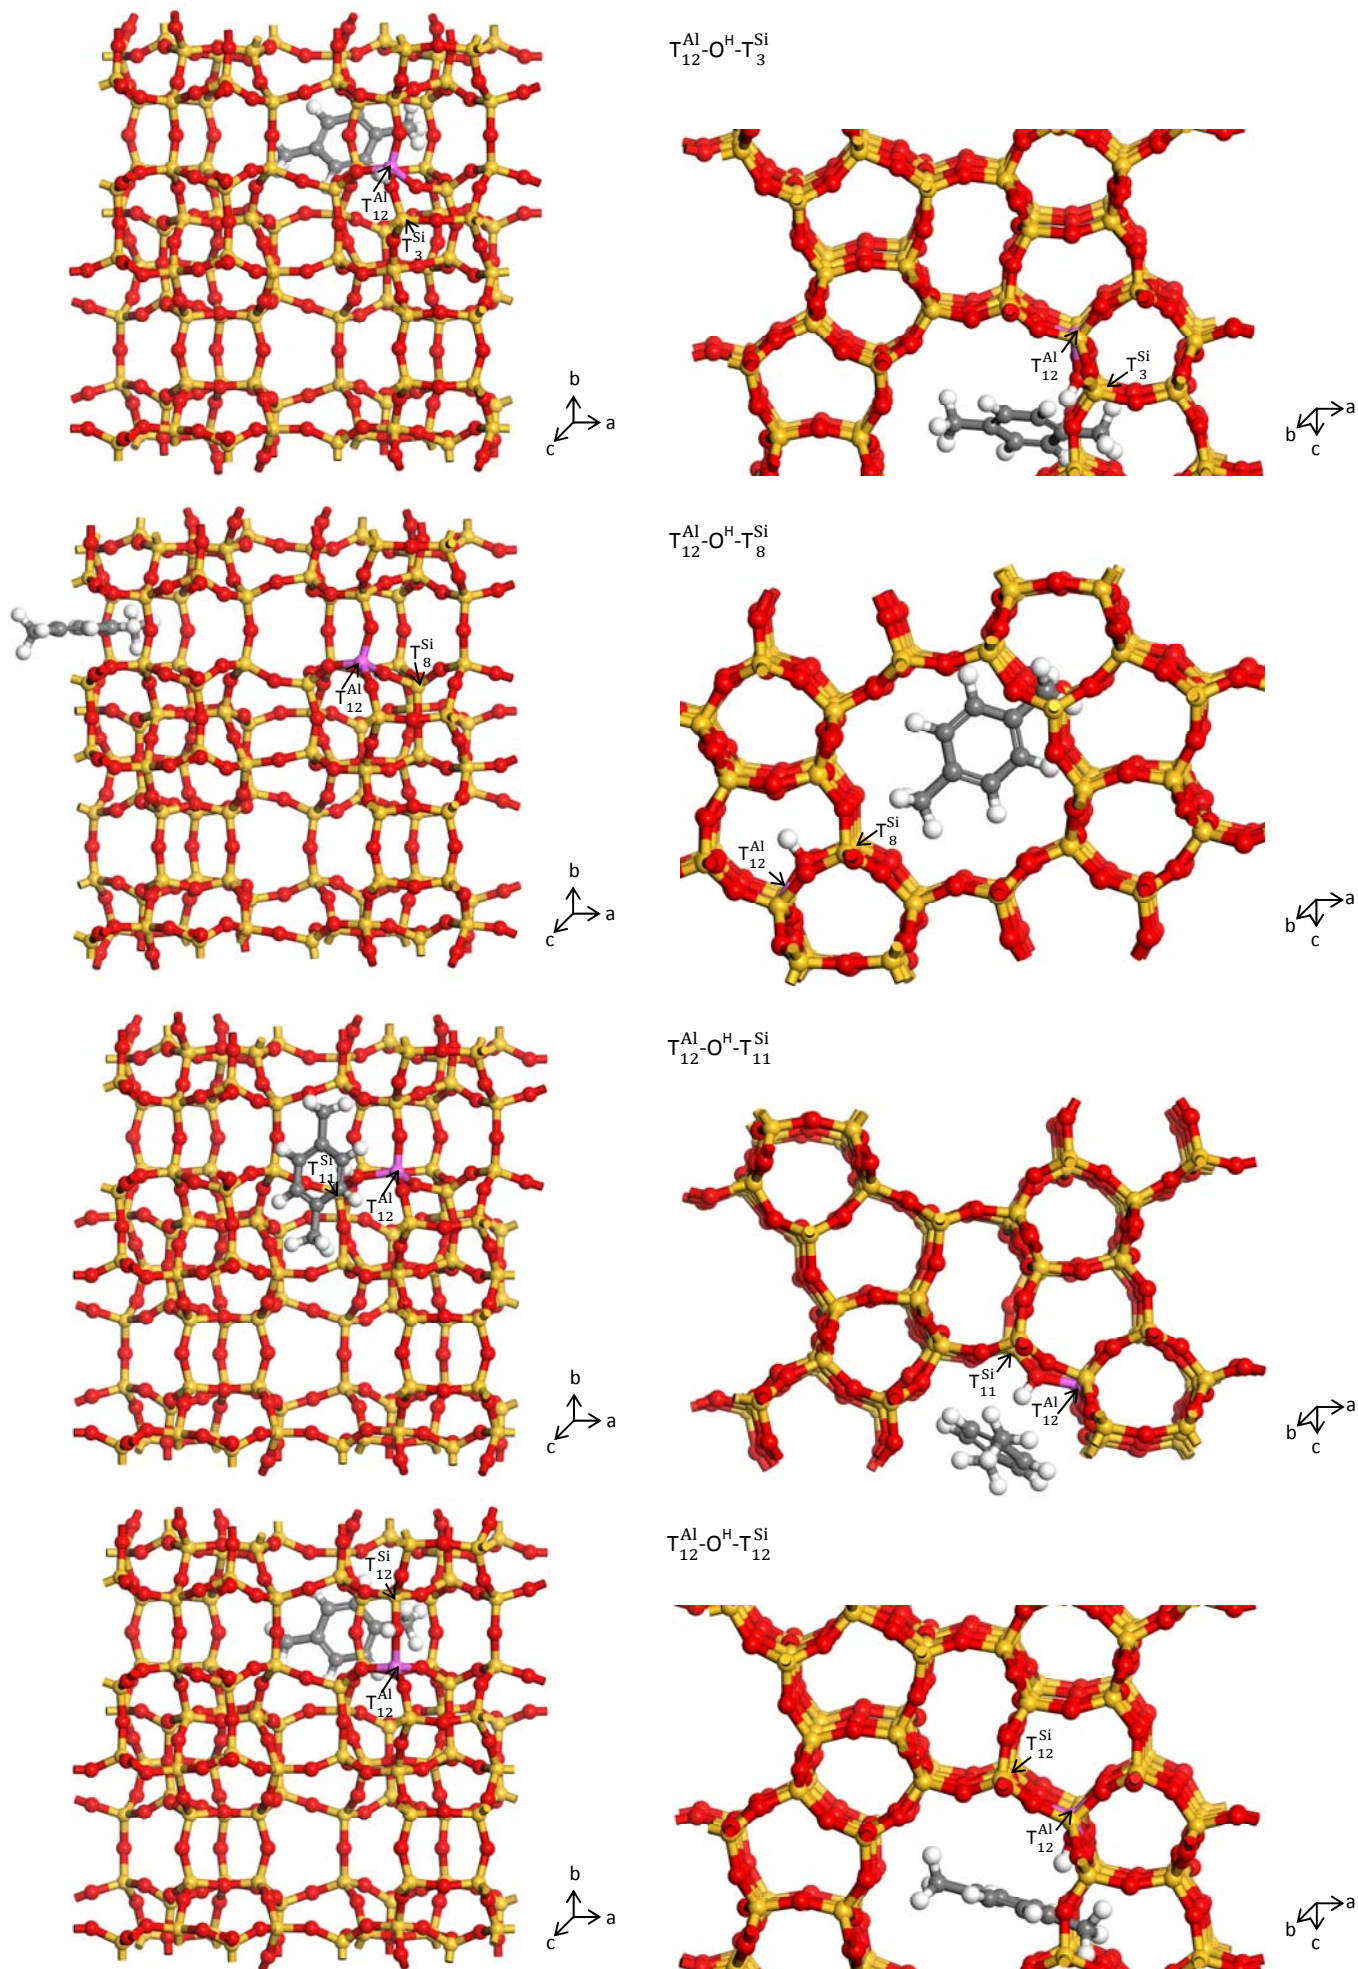

Figure S10 The optimized configurations of p-xylene adsorption at the acidic sites of the Al substituted T1, T3, T5, T7, T11 and T12 sites in the framework
